# Supplementary material for: mTORC2/Rac1 Pathway Predisposes Cancer Aggressiveness in IDH1-Mutated Glioma
Source: MDPI journal article supplement (doi:10.3390/cancers12040787), 2020-03-26
Supplement: s1 [file s1]

**Supplementary Table 3. List of differentially expressed genes in U251 IDH1 R132C compared with U251 IDH1 WT**

| <b>Gene Symbol</b> | <b>Entrez Gene Name</b>                                    | <b>Fold Change</b> | <b>FDR</b>  |
|--------------------|------------------------------------------------------------|--------------------|-------------|
| <b>A2M</b>         | alpha-2-macroglobulin                                      | 3.563              | 6.56E-133   |
| <b>ABCA1</b>       | ATP binding cassette subfamily A member 1                  | 1.722              | 2.68E-27    |
| <b>ABCA4</b>       | ATP binding cassette subfamily A member 4                  | 2.997              | 0.000469    |
| <b>ABCB11</b>      | ATP binding cassette subfamily B member 11                 | -3.243             | 0.000775    |
| <b>ABCB4</b>       | ATP binding cassette subfamily B member 4                  | -21.743            | 1.71E-09    |
| <b>ABHD8</b>       | abhydrolase domain containing 8                            | -1.596             | 0.0000909   |
| <b>ABI3BP</b>      | ABI family member 3 binding protein                        | -3.192             | 2E-109      |
| <b>ABTB2</b>       | ankyrin repeat and BTB domain containing 2                 | 1.685              | 6.03E-14    |
| <b>AC0030921</b>   |                                                            | 18.291             | 6.38E-16    |
| <b>AC0041583</b>   |                                                            | -3.434             | 0.000428    |
| <b>AC0051501</b>   |                                                            | -85.896            | 2.42E-80    |
| <b>AC0057867</b>   |                                                            | 2.821              | 0.000346    |
| <b>AC0936277</b>   |                                                            | 1.939              | 0.00102     |
| <b>AC0937871</b>   |                                                            | -2.743             | 1.19E-13    |
| <b>ACKR3</b>       | atypical chemokine receptor 3                              | 9.625              | 5.48E-16    |
| <b>ACP6</b>        | acid phosphatase 6, lysophosphatidic                       | -2.005             | 9.48E-23    |
| <b>ACSL5</b>       | acyl-CoA synthetase long chain family member 5             | 4.721              | 3.93E-19    |
| <b>ACSS3</b>       | acyl-CoA synthetase short chain family member 3            | -1.628             | 0.00000828  |
| <b>ACTA2</b>       | actin alpha 2, smooth muscle                               | 1.784              | 9.07E-13    |
| <b>ACTG1P19</b>    | actin gamma 1 pseudogene 19                                | -2.781             | 0.0000283   |
| <b>ACTG2</b>       | actin gamma 2, smooth muscle                               | -7.959             | 1.86E-14    |
| <b>ADAM22</b>      | ADAM metalloproteinase domain 22                           | 1.902              | 0.000929    |
| <b>ADAMTS10</b>    | ADAM metalloproteinase with thrombospondin type 1 motif 10 | 2.726              | 0.0000112   |
| <b>ADAMTS12</b>    | ADAM metalloproteinase with thrombospondin type 1 motif 12 | 2.111              | 7.73E-21    |
| <b>ADAMTS14</b>    | ADAM metalloproteinase with thrombospondin type 1 motif 14 | 7.924              | 2.08E-16    |
| <b>ADAMTS17</b>    | ADAM metalloproteinase with thrombospondin type 1 motif 17 | 6.937              | 0.000000166 |
| <b>ADAMTS2</b>     | ADAM metalloproteinase with thrombospondin type 1 motif 2  | 55.763             | 5.74E-47    |
| <b>ADCY1</b>       | adenylate cyclase 1                                        | 4.659              | 0.00000345  |
| <b>ADGRG1</b>      | adhesion G protein-coupled receptor G1                     | 1.776              | 1.13E-27    |
| <b>ADGRG6</b>      | adhesion G protein-coupled receptor G6                     | 1.614              | 0.0000069   |
| <b>ADRA1B</b>      | adrenoceptor alpha 1B                                      | -2.075             | 2.16E-19    |
| <b>ADRA1D</b>      | adrenoceptor alpha 1D                                      | -3.194             | 5.93E-29    |
| <b>ADRB2</b>       | adrenoceptor beta 2                                        | 3.608              | 2.78E-11    |
| <b>AFAP1L2</b>     | actin filament associated protein 1 like 2                 | 4.946              | 4.21E-34    |
| <b>AFF3</b>        | AF4/FMR2 family member 3                                   | 3.108              | 2.2E-21     |

|                      |                                                             |         |             |
|----------------------|-------------------------------------------------------------|---------|-------------|
| <b>AGMAT</b>         | agmatinase                                                  | -6.154  | 0.0000249   |
| <b>AGTRAP</b>        | angiotensin II receptor associated protein                  | 2.354   | 4.42E-28    |
| <b>AHNAK</b>         | AHNAK nucleoprotein                                         | 1.597   | 2.68E-14    |
| <b>AHNAK2</b>        | AHNAK nucleoprotein 2                                       | 1.983   | 2.3E-29     |
| <b>AHRR</b>          | aryl-hydrocarbon receptor repressor                         | 1.81    | 0.000214    |
| <b>AJAP1</b>         | adherens junctions associated protein 1                     | -1.892  | 0.000267    |
| <b>AK5</b>           | adenylate kinase 5                                          | -3.62   | 1.28E-50    |
| <b>AKAP6</b>         | A-kinase anchoring protein 6                                | -4.078  | 2.49E-90    |
| <b>AKR1C1/AKR1C2</b> | aldo-keto reductase family 1 member C2                      | 5.096   | 0.0000729   |
| <b>AKR1C1/AKR1C2</b> | aldo-keto reductase family 1 member C2                      | 4.024   | 7.95E-49    |
| <b>AKR1C3</b>        | aldo-keto reductase family 1 member C3                      | 1.801   | 4.2E-10     |
| <b>ALDH1A3</b>       | aldehyde dehydrogenase 1 family member A3                   | -2.212  | 2.04E-73    |
| <b>ALDH1L2</b>       | aldehyde dehydrogenase 1 family member L2                   | -2.141  | 0.000399    |
| <b>ALK</b>           | ALK receptor tyrosine kinase                                | -3.611  | 7.55E-17    |
| <b>ALX4</b>          | ALX homeobox 4                                              | 10.918  | 1.07E-30    |
| <b>AMOT</b>          | angiomotin                                                  | -1.883  | 1.14E-27    |
| <b>AMOTL2</b>        | angiomotin like 2                                           | -2.151  | 7.65E-40    |
| <b>ANGPTL4</b>       | angiopoietin like 4                                         | 6.849   | 1.41E-21    |
| <b>ANK1</b>          | ankyrin 1                                                   | -4.228  | 1.76E-39    |
| <b>ANKRD1</b>        | ankyrin repeat domain 1                                     | -1.892  | 5.94E-17    |
| <b>ANKRD18DP</b>     | ankyrin repeat domain 18D, pseudogene                       | -10.186 | 0.000109    |
| <b>ANKRD30B</b>      | ankyrin repeat domain 30B                                   | -3.413  | 0.00000791  |
| <b>ANKS1B</b>        | ankyrin repeat and sterile alpha motif domain containing 1B | -5.821  | 1.21E-29    |
| <b>ANTXR2</b>        | ANTXR cell adhesion molecule 2                              | 1.735   | 1.61E-23    |
| <b>AOC2</b>          | amine oxidase copper containing 2                           | 1.822   | 0.00000216  |
| <b>AOX1</b>          | aldehyde oxidase 1                                          | 2.29    | 1.66E-19    |
| <b>AP3B2</b>         | adaptor related protein complex 3 subunit beta 2            | 2.574   | 3.58E-10    |
| <b>APCDD1</b>        | APC down-regulated 1                                        | -1.981  | 9.45E-11    |
| <b>APCDD1L</b>       | APC down-regulated 1 like                                   | 3.046   | 8.92E-91    |
| <b>APLN</b>          | apelin                                                      | -1.897  | 0.000000293 |
| <b>APOBEC3F</b>      | apolipoprotein B mRNA editing enzyme catalytic subunit 3F   | 1.831   | 0.0000216   |
| <b>APOL1</b>         | apolipoprotein L1                                           | 1.932   | 4.98E-18    |
| <b>APOL6</b>         | apolipoprotein L6                                           | 2.056   | 8.18E-31    |
| <b>ARAP2</b>         | ArfGAP with RhoGAP domain, ankyrin repeat and PH domain 2   | 2.024   | 0.000469    |
| <b>ARG2</b>          | arginase 2                                                  | 2.982   | 1.1E-17     |
| <b>ARHGAP24</b>      | Rho GTPase activating protein 24                            | 24.153  | 6.13E-36    |
| <b>ARHGAP25</b>      | Rho GTPase activating protein 25                            | 1.913   | 0.000237    |

|                    |                                                                           |        |            |
|--------------------|---------------------------------------------------------------------------|--------|------------|
| <b>ARHGAP36</b>    | Rho GTPase activating protein 36                                          | -5.717 | 9E-11      |
| <b>ARHGAP4</b>     | Rho GTPase activating protein 4                                           | 2.338  | 0.00107    |
| <b>ARHGAP42</b>    | Rho GTPase activating protein 42                                          | 1.756  | 4.4E-10    |
| <b>ARHGAP44</b>    | Rho GTPase activating protein 44                                          | 6.028  | 0.00000046 |
| <b>ARHGAP45</b>    | Rho GTPase activating protein 45                                          | -4.917 | 1.02E-13   |
| <b>ARHGAP5-AS1</b> | ARHGAP5 antisense RNA 1 (head to head)                                    | -2.443 | 3.1E-10    |
| <b>ARNT2</b>       | aryl hydrocarbon receptor nuclear translocator 2                          | -2.201 | 4.78E-46   |
| <b>ARRB1</b>       | arrestin beta 1                                                           | 2.74   | 3.02E-17   |
| <b>ASIC1</b>       | acid sensing ion channel subunit 1                                        | 1.884  | 4.82E-10   |
| <b>ASIC3</b>       | acid sensing ion channel subunit 3                                        | 2.278  | 7.88E-10   |
| <b>ASPHD1</b>      | aspartate beta-hydroxylase domain containing 1                            | 2.566  | 5.5E-09    |
| <b>ASS1</b>        | argininosuccinate synthase 1                                              | 2.585  | 3.66E-10   |
| <b>ATOH8</b>       | atonal bHLH transcription factor 8                                        | -3.426 | 2.2E-10    |
| <b>ATP10A</b>      | ATPase phospholipid transporting 10A (putative)                           | 3.379  | 1.69E-24   |
| <b>ATP11A</b>      | ATPase phospholipid transporting 11A                                      | 2.026  | 4.98E-32   |
| <b>ATP2A1</b>      | ATPase sarcoplasmic/endoplasmic reticulum Ca <sup>2+</sup> transporting 1 | 1.984  | 0.000999   |
| <b>ATP2B1</b>      | ATPase plasma membrane Ca <sup>2+</sup> transporting 1                    | 1.599  | 1.43E-17   |
| <b>ATP6V1C2</b>    | ATPase H <sup>+</sup> transporting V1 subunit C2                          | -2.653 | 3.93E-10   |
| <b>ATP8A1</b>      | ATPase phospholipid transporting 8A1                                      | 4.495  | 0.00000661 |
| <b>ATRNL1</b>      | attractin like 1                                                          | 1.647  | 0.0000071  |
| <b>AZGP1</b>       | alpha-2-glycoprotein 1, zinc-binding                                      | -7.972 | 7.84E-140  |
| <b>B3GALT5</b>     | beta-1,3-galactosyltransferase 5                                          | 3.147  | 7.43E-09   |
| <b>B4GALNT3</b>    | beta-1,4-N-acetyl-galactosaminyltransferase 3                             | -1.977 | 7.8E-23    |
| <b>BASP1</b>       | brain abundant membrane attached signal protein 1                         | 35.633 | 8.34E-142  |
| <b>BATF3</b>       | basic leucine zipper ATF-like transcription factor 3                      | -1.889 | 0.00000313 |
| <b>BBOX1-AS1</b>   | BBOX1 antisense RNA 1                                                     | 3.258  | 0.000132   |
| <b>BCAR3</b>       | BCAR3 adaptor protein, NSP family member                                  | 1.87   | 4.25E-34   |
| <b>BCAT1</b>       | branched chain amino acid transaminase 1                                  | -1.565 | 1.62E-14   |
| <b>BCHE</b>        | butyrylcholinesterase                                                     | 2.344  | 0.000122   |
| <b>BCL2L11</b>     | BCL2 like 11                                                              | 2.262  | 2.49E-34   |
| <b>BDH1</b>        | 3-hydroxybutyrate dehydrogenase 1                                         | -1.635 | 2.91E-09   |
| <b>BDH2</b>        | 3-hydroxybutyrate dehydrogenase 2                                         | 1.993  | 0.000161   |
| <b>BEND4</b>       | BEN domain containing 4                                                   | 6.744  | 2.75E-18   |
| <b>BEND5</b>       | BEN domain containing 5                                                   | -3.789 | 0.000369   |
| <b>BEX1</b>        | brain expressed X-linked 1                                                | -2.499 | 0.014      |
| <b>BHLHE40</b>     | basic helix-loop-helix family member e40                                  | 1.798  | 3.36E-31   |
| <b>BHLHE41</b>     | basic helix-loop-helix family member e41                                  | 2.204  | 2.43E-33   |

|                  |                                                               |         |             |
|------------------|---------------------------------------------------------------|---------|-------------|
| <b>BMP4</b>      | bone morphogenetic protein 4                                  | 13.466  | 2.1E-16     |
| <b>BNIP3L</b>    | BCL2 interacting protein 3 like                               | 1.575   | 3.03E-15    |
| <b>BOC</b>       | BOC cell adhesion associated, oncogene regulated              | 1.582   | 7.94E-12    |
| <b>BRINP1</b>    | BMP/retinoic acid inducible neural specific 1                 | 122.851 | 1.73E-115   |
| <b>BRSK2</b>     | BR serine/threonine kinase 2                                  | 4.742   | 1.3E-09     |
| <b>BST2</b>      | bone marrow stromal cell antigen 2                            | 3.008   | 0.000132    |
| <b>BTBD11</b>    | BTB domain containing 11                                      | 19.687  | 2.12E-42    |
| <b>BTBD19</b>    | BTB domain containing 19                                      | 1.641   | 9.37E-08    |
| <b>BTN3A1</b>    | butyrophilin subfamily 3 member A1                            | 1.934   | 1.78E-15    |
| <b>BTN3A3</b>    | butyrophilin subfamily 3 member A3                            | 1.796   | 6.28E-09    |
| <b>BTNL8</b>     | butyrophilin like 8                                           | 5.792   | 1.21E-08    |
| <b>C10orf90</b>  | chromosome 10 open reading frame 90                           | 2.127   | 1.12E-09    |
| <b>C11orf80</b>  | chromosome 11 open reading frame 80                           | 1.775   | 4.02E-09    |
| <b>C11orf87</b>  | chromosome 11 open reading frame 87                           | -6.448  | 0.000000851 |
| <b>C16orf74</b>  | chromosome 16 open reading frame 74                           | 1.96    | 2.7E-09     |
| <b>C19orf71</b>  | chromosome 19 open reading frame 71                           | 2.888   | 0.00993     |
| <b>C1QTNF6</b>   | C1q and TNF related 6                                         | 1.822   | 0.000155    |
| <b>C1R</b>       | complement C1r                                                | 2.349   | 8.7E-18     |
| <b>C1RL</b>      | complement C1r subcomponent like                              | 2.109   | 3.68E-11    |
| <b>C1S</b>       | complement C1s                                                | 4.187   | 5.35E-39    |
| <b>C20orf204</b> | chromosome 20 open reading frame 204                          | 1.785   | 0.000187    |
| <b>C3</b>        | complement C3                                                 | 8.149   | 9.18E-33    |
| <b>C3AR1</b>     | complement C3a receptor 1                                     | 2.708   | 0.00015     |
| <b>C3orf14</b>   | chromosome 3 open reading frame 14                            | -1.576  | 2.49E-10    |
| <b>C3orf70</b>   | chromosome 3 open reading frame 70                            | 5.441   | 9.12E-13    |
| <b>C4orf19</b>   | chromosome 4 open reading frame 19                            | 2.523   | 6.08E-26    |
| <b>C5orf46</b>   | chromosome 5 open reading frame 46                            | -3.031  | 2.41E-63    |
| <b>CA11</b>      | carbonic anhydrase 11                                         | 2.021   | 0.000000021 |
| <b>CA12</b>      | carbonic anhydrase 12                                         | 1.858   | 0.000000114 |
| <b>CA8</b>       | carbonic anhydrase 8                                          | 18.419  | 3.47E-34    |
| <b>CACNA1A</b>   | calcium voltage-gated channel subunit alpha1 A                | 8.839   | 2.67E-08    |
| <b>CACNA1E</b>   | calcium voltage-gated channel subunit alpha1 E                | 5.434   | 0.000000298 |
| <b>CACNA2D3</b>  | calcium voltage-gated channel auxiliary subunit alpha2delta 3 | 2.594   | 0.000000943 |
| <b>CACNG4</b>    | calcium voltage-gated channel auxiliary subunit gamma 4       | 2.74    | 1.18E-36    |
| <b>CALB1</b>     | calbindin 1                                                   | 12.998  | 8.21E-08    |
| <b>CALCRL</b>    | calcitonin receptor like receptor                             | 1.813   | 0.000799    |
| <b>CALHM5</b>    | calcium homeostasis modulator family member 5                 | 1.947   | 7.53E-10    |

|                 |                                                            |        |             |
|-----------------|------------------------------------------------------------|--------|-------------|
| <b>CAMK2N1</b>  | calcium/calmodulin dependent protein kinase II inhibitor 1 | 2.287  | 1.89E-24    |
| <b>CAND2</b>    | cullin associated and neddylation dissociated 2 (putative) | -7.143 | 3.63E-16    |
| <b>CARD6</b>    | caspase recruitment domain family member 6                 | 1.836  | 1.52E-14    |
| <b>CASP1</b>    | caspase 1                                                  | 1.686  | 0.000112    |
| <b>CBS/CBSL</b> | cystathionine beta-synthase                                | -1.611 | 0.00000209  |
| <b>CC2D2A</b>   | coiled-coil and C2 domain containing 2A                    | -1.702 | 6.11E-16    |
| <b>CCDC102B</b> | coiled-coil domain containing 102B                         | -2.558 | 9.03E-10    |
| <b>CCDC106</b>  | coiled-coil domain containing 106                          | -2.377 | 5.27E-15    |
| <b>CCDC13</b>   | coiled-coil domain containing 13                           | -4.96  | 0.0000587   |
| <b>CCDC144A</b> | coiled-coil domain containing 144A                         | -3.939 | 1.25E-14    |
| <b>CCDC148</b>  | coiled-coil domain containing 148                          | -2.86  | 0.0015      |
| <b>CCDC160</b>  | coiled-coil domain containing 160                          | -2.429 | 0.000428    |
| <b>CCDC184</b>  | coiled-coil domain containing 184                          | -2.426 | 5.89E-10    |
| <b>CCDC61</b>   | coiled-coil domain containing 61                           | -1.726 | 5.33E-09    |
| <b>CCDC80</b>   | coiled-coil domain containing 80                           | 1.6    | 5.01E-23    |
| <b>CCN2</b>     | cellular communication network factor 2                    | -1.719 | 1.31E-41    |
| <b>CCN3</b>     | cellular communication network factor 3                    | 8.762  | 0.000000414 |
| <b>CD101</b>    | CD101 molecule                                             | 2.039  | 0.000742    |
| <b>CD180</b>    | CD180 molecule                                             | 6.58   | 3.56E-131   |
| <b>CD200</b>    | CD200 molecule                                             | -3.566 | 4.24E-24    |
| <b>CD274</b>    | CD274 molecule                                             | -1.775 | 4.28E-21    |
| <b>CD300C</b>   | CD300c molecule                                            | 85.504 | 2.01E-16    |
| <b>CD33</b>     | CD33 molecule                                              | 31.807 | 4.48E-182   |
| <b>CD55</b>     | CD55 molecule (Cromer blood group)                         | 6.505  | 7.89E-34    |
| <b>CD82</b>     | CD82 molecule                                              | 3.469  | 5.08E-106   |
| <b>CD93</b>     | CD93 molecule                                              | 5.317  | 4.73E-13    |
| <b>CDH6</b>     | cadherin 6                                                 | -5.879 | 4.13E-90    |
| <b>CDKN1A</b>   | cyclin dependent kinase inhibitor 1A                       | 2.463  | 1.04E-50    |
| <b>CDON</b>     | cell adhesion associated, oncogene regulated               | 1.796  | 7.47E-29    |
| <b>CDYL2</b>    | chromodomain Y like 2                                      | 7.753  | 5.36E-81    |
| <b>CEBPD</b>    | CCAAT enhancer binding protein delta                       | 1.822  | 0.0016      |
| <b>CECR2</b>    | CECR2 histone acetyl-lysine reader                         | 16.564 | 1.45E-10    |
| <b>CECR7</b>    | cat eye syndrome chromosome region, candidate 7            | 2.208  | 0.0000015   |
| <b>CELSR2</b>   | cadherin EGF LAG seven-pass G-type receptor 2              | -1.773 | 6.12E-21    |
| <b>CEMIP</b>    | cell migration inducing hyaluronidase 1                    | 2.056  | 3.7E-15     |
| <b>CEP41</b>    | centrosomal protein 41                                     | -1.565 | 8.76E-12    |
| <b>CERS1</b>    | ceramide synthase 1                                        | 2.928  | 0.00041     |

|                |                                                    |         |             |
|----------------|----------------------------------------------------|---------|-------------|
| <b>CERS4</b>   | ceramide synthase 4                                | -1.613  | 0.0000456   |
| <b>CES1P1</b>  | carboxylesterase 1 pseudogene 1                    | 80.492  | 5.08E-26    |
| <b>CES1P2</b>  | carboxylesterase 1 pseudogene 2                    | 135.627 | 2.91E-42    |
| <b>CFAP45</b>  | cilia and flagella associated protein 45           | 1.909   | 0.0000193   |
| <b>CFI</b>     | complement factor I                                | 1.559   | 2.36E-16    |
| <b>CGA</b>     | glycoprotein hormones, alpha polypeptide           | -4.097  | 6.74E-10    |
| <b>CGNL1</b>   | cingulin like 1                                    | -1.576  | 5.76E-21    |
| <b>CHAF1A</b>  | chromatin assembly factor 1 subunit A              | -1.544  | 2.21E-16    |
| <b>CHFR</b>    | checkpoint with forkhead and ring finger domains   | -2.15   | 8.44E-14    |
| <b>CHI3L1</b>  | chitinase 3 like 1                                 | 106.661 | 0           |
| <b>CHI3L2</b>  | chitinase 3 like 2                                 | 2.813   | 2.79E-11    |
| <b>CHST1</b>   | carbohydrate sulfotransferase 1                    | 1.606   | 0.0000284   |
| <b>CHST11</b>  | carbohydrate sulfotransferase 11                   | 2.246   | 9.43E-38    |
| <b>CHST15</b>  | carbohydrate sulfotransferase 15                   | 12.731  | 7.37E-123   |
| <b>CHSY3</b>   | chondroitin sulfate synthase 3                     | -5.651  | 9.74E-20    |
| <b>CIART</b>   | circadian associated repressor of transcription    | 2.369   | 4.99E-18    |
| <b>CIB2</b>    | calcium and integrin binding family member 2       | -1.707  | 0.0000362   |
| <b>CKB</b>     | creatine kinase B                                  | -2.291  | 1.64E-13    |
| <b>CLCA2</b>   | chloride channel accessory 2                       | 7.544   | 8.21E-17    |
| <b>CLDN1</b>   | claudin 1                                          | 2.41    | 3E-19       |
| <b>CLDN15</b>  | claudin 15                                         | 1.571   | 8.86E-08    |
| <b>CLU</b>     | clusterin                                          | 2.3     | 3.06E-31    |
| <b>CMPK2</b>   | cytidine/uridine monophosphate kinase 2            | 4.407   | 0.000000933 |
| <b>CMTM8</b>   | CKLF like MARVEL transmembrane domain containing 8 | -2.096  | 1.11E-17    |
| <b>CNIH2</b>   | cornichon family AMPA receptor auxiliary protein 2 | -2.894  | 0.00000892  |
| <b>CNR1</b>    | cannabinoid receptor 1                             | -4.256  | 4.75E-127   |
| <b>CNTNAP2</b> | contactin associated protein like 2                | 4.58    | 5.84E-22    |
| <b>COBL</b>    | cordons-bleu WH2 repeat protein                    | 16.452  | 2.48E-21    |
| <b>COBLL1</b>  | cordons-bleu WH2 repeat protein like 1             | 1.938   | 3.96E-30    |
| <b>COL11A1</b> | collagen type XI alpha 1 chain                     | -1.771  | 3.56E-30    |
| <b>COL13A1</b> | collagen type XIII alpha 1 chain                   | 1.631   | 8.38E-10    |
| <b>COL17A1</b> | collagen type XVII alpha 1 chain                   | 3.338   | 2.25E-76    |
| <b>COL25A1</b> | collagen type XXV alpha 1 chain                    | -2.458  | 0.000249    |
| <b>COL8A1</b>  | collagen type VIII alpha 1 chain                   | -1.802  | 9.58E-16    |
| <b>COL8A2</b>  | collagen type VIII alpha 2 chain                   | 2.848   | 0.00000237  |
| <b>COL9A2</b>  | collagen type IX alpha 2 chain                     | -1.965  | 0.000000012 |
| <b>COL9A3</b>  | collagen type IX alpha 3 chain                     | -5.761  | 5.53E-20    |

|                     |                                                          |         |             |
|---------------------|----------------------------------------------------------|---------|-------------|
| <b>COLEC12</b>      | collectin subfamily member 12                            | 9.503   | 1.63E-18    |
| <b>CORO2B</b>       | coronin 2B                                               | -1.782  | 8.28E-15    |
| <b>CP</b>           | ceruloplasmin                                            | 3.285   | 5.87E-105   |
| <b>CPA4</b>         | carboxypeptidase A4                                      | 1.705   | 9.84E-28    |
| <b>CPA6</b>         | carboxypeptidase A6                                      | -1.541  | 3.39E-08    |
| <b>CPE</b>          | carboxypeptidase E                                       | 5.737   | 0.0000189   |
| <b>CPEB1</b>        | cytoplasmic polyadenylation element binding protein 1    | 2.093   | 2.03E-09    |
| <b>CPM</b>          | carboxypeptidase M                                       | -3.12   | 0.0000149   |
| <b>CPT1C</b>        | carnitine palmitoyltransferase 1C                        | -2.2    | 6.14E-18    |
| <b>CPVL</b>         | carboxypeptidase vitellogenic like                       | 2.028   | 0.000101    |
| <b>CRACD</b>        | capping protein inhibiting regulator of actin dynamics   | -1.858  | 4.96E-09    |
| <b>CRISPLD1</b>     | cysteine rich secretory protein LCCL domain containing 1 | 2.745   | 1.95E-28    |
| <b>CRLF1</b>        | cytokine receptor like factor 1                          | 3.335   | 0.00000259  |
| <b>CRMP1</b>        | collapsin response mediator protein 1                    | 2.615   | 0.00000184  |
| <b>CRY2</b>         | cryptochrome circadian regulator 2                       | 1.628   | 3.44E-11    |
| <b>CRYAB</b>        | crystallin alpha B                                       | -3.99   | 2.82E-91    |
| <b>CSAG1</b>        | chondrosarcoma associated gene 1                         | 3.737   | 0.000000263 |
| <b>CSF1</b>         | colony stimulating factor 1                              | 1.911   | 2.78E-32    |
| <b>CSF2</b>         | colony stimulating factor 2                              | 3.184   | 3.28E-09    |
| <b>CSGALNACT1</b>   | chondroitin sulfate N-acetylgalactosaminyltransferase 1  | 2.787   | 1.25E-08    |
| <b>CSPG4P11</b>     | chondroitin sulfate proteoglycan 4 pseudogene 11         | -1.831  | 0.000948    |
| <b>CSRNP3</b>       | cysteine and serine rich nuclear protein 3               | 3.155   | 0.0000504   |
| <b>CTA_384D836</b>  |                                                          | -1.653  | 0.000162    |
| <b>CTA_390C1010</b> |                                                          | 2.389   | 0.0000384   |
| <b>CTB_78F12</b>    |                                                          | 1.696   | 0.0000592   |
| <b>CTBS</b>         | chitinase                                                | 1.815   | 5.49E-16    |
| <b>CTC_353G131</b>  |                                                          | -11.197 | 0.0000077   |
| <b>CTD_2017D111</b> |                                                          | 1.793   | 0.0000183   |
| <b>CTD_2611O126</b> |                                                          | 3.748   | 0.00017     |
| <b>CTNNA2</b>       | catenin alpha 2                                          | -3.887  | 1.07E-48    |
| <b>CTNND2</b>       | catenin delta 2                                          | -2.368  | 2.61E-26    |
| <b>CTSH</b>         | cathepsin H                                              | 1.948   | 7.06E-29    |
| <b>CTSS</b>         | cathepsin S                                              | 2.789   | 7.73E-22    |
| <b>CXADR</b>        | CXADR Ig-like cell adhesion molecule                     | 1.947   | 1.92E-19    |
| <b>CXCL12</b>       | C-X-C motif chemokine ligand 12                          | 6.535   | 1.97E-39    |
| <b>CYB5A</b>        | cytochrome b5 type A                                     | -1.577  | 1.09E-11    |
| <b>CYB5R2</b>       | cytochrome b5 reductase 2                                | -1.673  | 2.75E-09    |

|                 |                                                     |         |             |
|-----------------|-----------------------------------------------------|---------|-------------|
| <b>CYBRD1</b>   | cytochrome b reductase 1                            | 1.579   | 1.66E-20    |
| <b>CYP27C1</b>  | cytochrome P450 family 27 subfamily C member 1      | 2.644   | 7.21E-17    |
| <b>CYP2C8</b>   | cytochrome P450 family 2 subfamily C member 8       | 4.168   | 0.0000372   |
| <b>CYP2R1</b>   | cytochrome P450 family 2 subfamily R member 1       | 3.227   | 0.0000858   |
| <b>CYP46A1</b>  | cytochrome P450 family 46 subfamily A member 1      | -1.933  | 0.000000572 |
| <b>CYTL1</b>    | cytokine like 1                                     | -12.183 | 1.62E-17    |
| <b>DAAM2</b>    | dishevelled associated activator of morphogenesis 2 | 2.688   | 0.000144    |
| <b>DAB1</b>     | DAB adaptor protein 1                               | -2.113  | 0.000701    |
| <b>DARS-AS1</b> | DARS antisense RNA 1                                | 2.602   | 0.00014     |
| <b>DBP</b>      | D-box binding PAR bZIP transcription factor         | 1.887   | 1.57E-08    |
| <b>DDIT4</b>    | DNA damage inducible transcript 4                   | 1.64    | 4.43E-09    |
| <b>DENND2D</b>  | DENN domain containing 2D                           | -3.804  | 0.000111    |
| <b>DEPP1</b>    | DEPP1 autophagy regulator                           | 2.264   | 1.51E-16    |
| <b>DGAT2</b>    | diacylglycerol O-acyltransferase 2                  | 2.068   | 2.15E-15    |
| <b>DGCR5</b>    | DiGeorge syndrome critical region gene 5            | 2.083   | 0.0000354   |
| <b>DGKE</b>     | diacylglycerol kinase epsilon                       | 1.736   | 0.0000241   |
| <b>DGKI</b>     | diacylglycerol kinase iota                          | 1.564   | 7.02E-08    |
| <b>DHODH</b>    | dihydroorotate dehydrogenase (quinone)              | -1.538  | 9.1E-13     |
| <b>DHRS2</b>    | dehydrogenase/reductase 2                           | 3.351   | 1.67E-17    |
| <b>DHRS9</b>    | dehydrogenase/reductase 9                           | -4.562  | 2.47E-14    |
| <b>DIO2</b>     | iodothyronine deiodinase 2                          | -2.407  | 1.51E-27    |
| <b>DIRAS1</b>   | DIRAS family GTPase 1                               | -5.899  | 4.58E-26    |
| <b>DIRAS3</b>   | DIRAS family GTPase 3                               | -1.689  | 2.33E-17    |
| <b>DISP2</b>    | dispatched RND transporter family member 2          | 1.897   | 0.000375    |
| <b>DLC1</b>     | DLC1 Rho GTPase activating protein                  | 2.454   | 5.33E-33    |
| <b>DLL1</b>     | delta like canonical Notch ligand 1                 | 3.502   | 1.33E-14    |
| <b>DMBT1</b>    | deleted in malignant brain tumors 1                 | 4.286   | 0.000000135 |
| <b>DMBX1</b>    | diencephalon/mesencephalon homeobox 1               | 3.814   | 3.43E-34    |
| <b>DMRTA1</b>   | DMRT like family A1                                 | 1.705   | 0.00000353  |
| <b>DNAJB9</b>   | DnaJ heat shock protein family (Hsp40) member B9    | 1.562   | 0.00000025  |
| <b>DNER</b>     | delta/notch like EGF repeat containing              | 1.602   | 2.83E-22    |
| <b>DNHD1</b>    | dynein heavy chain domain 1                         | 1.939   | 7.94E-09    |
| <b>DNM1</b>     | dynamamin 1                                         | 1.585   | 1.16E-17    |
| <b>DNM3</b>     | dynamamin 3                                         | -2.287  | 8.54E-26    |
| <b>DNPH1</b>    | 2'-deoxynucleoside 5'-phosphate N-hydrolase 1       | -1.659  | 0.000042    |
| <b>DOCK3</b>    | dedicator of cytokinesis 3                          | 1.69    | 0.000000233 |
| <b>DOCK4</b>    | dedicator of cytokinesis 4                          | 2.152   | 8.42E-37    |



|                 |                                                                                |        |             |
|-----------------|--------------------------------------------------------------------------------|--------|-------------|
| <b>DOK5</b>     | docking protein 5                                                              | -9.578 | 1.68E-54    |
| <b>DPYSL5</b>   | dihydropyrimidinase like 5                                                     | 8.562  | 1.5E-149    |
| <b>DRD2</b>     | dopamine receptor D2                                                           | 1.596  | 2.41E-17    |
| <b>DSE</b>      | dermatan sulfate epimerase                                                     | 2.15   | 1.46E-24    |
| <b>DSP</b>      | desmoplakin                                                                    | 4.858  | 6.88E-14    |
| <b>DTX3</b>     | deltex E3 ubiquitin ligase 3                                                   | -2.117 | 1.4E-20     |
| <b>DUSP1</b>    | dual specificity phosphatase 1                                                 | 1.538  | 7.83E-12    |
| <b>DUSP10</b>   | dual specificity phosphatase 10                                                | 1.904  | 5.14E-19    |
| <b>DUSP5</b>    | dual specificity phosphatase 5                                                 | 2.144  | 3.6E-28     |
| <b>DUXAP10</b>  | double homeobox A pseudogene 10                                                | 7      | 3.89E-24    |
| <b>DUXAP8</b>   | double homeobox A pseudogene 8                                                 | 14.656 | 3.15E-31    |
| <b>DUXAP9</b>   | double homeobox A pseudogene 9                                                 | 7.291  | 3.17E-16    |
| <b>DYRK3</b>    | dual specificity tyrosine phosphorylation regulated kinase 3                   | 1.856  | 0.00208     |
| <b>E2F8</b>     | E2F transcription factor 8                                                     | -1.612 | 8.19E-14    |
| <b>EBF1</b>     | EBF transcription factor 1                                                     | 1.756  | 0.0000748   |
| <b>ECSCR</b>    | endothelial cell surface expressed chemotaxis and apoptosis regulator          | 5.299  | 5.33E-13    |
| <b>EDIL3</b>    | EGF like repeats and discoidin domains 3                                       | 2.962  | 5.07E-58    |
| <b>EDIL3-DT</b> |                                                                                | 2.544  | 0.0000264   |
| <b>EDN1</b>     | endothelin 1                                                                   | -2.198 | 4.08E-37    |
| <b>EDNRB</b>    | endothelin receptor type B                                                     | -1.653 | 1.8E-10     |
| <b>EEF1A2</b>   | eukaryotic translation elongation factor 1 alpha 2                             | 2.135  | 1.18E-22    |
| <b>EEFSEC</b>   | eukaryotic elongation factor, selenocysteine-tRNA specific                     | -2.121 | 4.63E-17    |
| <b>EFEMP2</b>   | EGF containing fibulin extracellular matrix protein 2                          | -3.334 | 1.67E-21    |
| <b>EFNA1</b>    | ephrin A1                                                                      | 2.769  | 1.33E-12    |
| <b>EFNA4</b>    | ephrin A4                                                                      | 1.642  | 0.0000207   |
| <b>EHD3</b>     | EH domain containing 3                                                         | 2.26   | 3.85E-28    |
| <b>ELFN2</b>    | extracellular leucine rich repeat and fibronectin type III domain containing 2 | 2.166  | 4.57E-30    |
| <b>ELMO1</b>    | engulfment and cell motility 1                                                 | 1.675  | 1.11E-12    |
| <b>ELOVL2</b>   | ELOVL fatty acid elongase 2                                                    | -2.215 | 0.000000304 |
| <b>ELOVL7</b>   | ELOVL fatty acid elongase 7                                                    | 1.717  | 2.17E-08    |
| <b>EN1</b>      | engrailed homeobox 1                                                           | -1.664 | 4.09E-08    |
| <b>ENPP2</b>    | ectonucleotide pyrophosphatase/phosphodiesterase 2                             | 8.436  | 9.52E-10    |
| <b>ENPP5</b>    | ectonucleotide pyrophosphatase/phosphodiesterase family member 5               | 1.806  | 0.000997    |
| <b>EPAS1</b>    | endothelial PAS domain protein 1                                               | 2.353  | 4.19E-62    |
| <b>EPB41L4A</b> | erythrocyte membrane protein band 4.1 like 4A                                  | 2.263  | 2.06E-21    |
| <b>EPB41L4B</b> | erythrocyte membrane protein band 4.1 like 4B                                  | 2.883  | 4.79E-37    |
| <b>EPHA3</b>    | EPH receptor A3                                                                | -2.238 | 3.18E-61    |

|                   |                                                             |        |             |
|-------------------|-------------------------------------------------------------|--------|-------------|
| <b>EPHA4</b>      | EPH receptor A4                                             | -1.887 | 5E-10       |
| <b>EPHA5</b>      | EPH receptor A5                                             | 3.216  | 2.23E-41    |
| <b>EPHB2</b>      | EPH receptor B2                                             | 2.672  | 7.39E-82    |
| <b>EPHX1</b>      | epoxide hydrolase 1                                         | 1.816  | 2.84E-24    |
| <b>EPHX4</b>      | epoxide hydrolase 4                                         | 1.72   | 0.00000156  |
| <b>EPST11</b>     | epithelial stromal interaction 1                            | -1.775 | 0.00000341  |
| <b>ERAP1</b>      | endoplasmic reticulum aminopeptidase 1                      | 1.659  | 1.85E-22    |
| <b>ERAP2</b>      | endoplasmic reticulum aminopeptidase 2                      | 2.21   | 3.84E-54    |
| <b>ERCC2</b>      | ERCC excision repair 2, TFIIH core complex helicase subunit | -1.974 | 2.29E-29    |
| <b>ERFE</b>       | erythroferrone                                              | 2.313  | 2.14E-24    |
| <b>ERICH3</b>     | glutamate rich 3                                            | -8.581 | 1.45E-09    |
| <b>ERMP1</b>      | endoplasmic reticulum metalloproteinase 1                   | 1.988  | 2.38E-25    |
| <b>ERP29</b>      | endoplasmic reticulum protein 29                            | 1.608  | 3.1E-21     |
| <b>ETV1</b>       | ETS variant transcription factor 1                          | 1.885  | 1.44E-13    |
| <b>EVC</b>        | EvC ciliary complex subunit 1                               | -1.57  | 8.82E-15    |
| <b>EVI2A</b>      | ecotropic viral integration site 2A                         | 1.999  | 3.88E-10    |
| <b>EXTL1</b>      | exostosin like glycosyltransferase 1                        | -9.48  | 5.62E-16    |
| <b>EYA2</b>       | EYA transcriptional coactivator and phosphatase 2           | 2.641  | 0.000207    |
| <b>F11R</b>       | F11 receptor                                                | -2.053 | 6.97E-15    |
| <b>F2RL2</b>      | coagulation factor II thrombin receptor like 2              | 1.854  | 3.48E-13    |
| <b>F3</b>         | coagulation factor III, tissue factor                       | -1.814 | 6.8E-26     |
| <b>FABP7</b>      | fatty acid binding protein 7                                | -1.763 | 7.25E-25    |
| <b>FAM106C</b>    | family with sequence similarity 106 member C                | -3.448 | 0.000144    |
| <b>FAM131A</b>    | family with sequence similarity 131 member A                | -1.968 | 1.98E-15    |
| <b>FAM131B</b>    | family with sequence similarity 131 member B                | 1.994  | 0.0000479   |
| <b>FAM13A-AS1</b> | FAM13A antisense RNA 1                                      | 1.87   | 0.000559    |
| <b>FAM160A1</b>   | family with sequence similarity 160 member A1               | 1.65   | 0.000000769 |
| <b>FAM166C</b>    | family with sequence similarity 166 member C                | 2.653  | 0.000409    |
| <b>FAM167A</b>    | family with sequence similarity 167 member A                | 3.374  | 0.0000133   |
| <b>FAM171B</b>    | family with sequence similarity 171 member B                | 1.583  | 4.19E-08    |
| <b>FAM189A1</b>   | family with sequence similarity 189 member A1               | 16.445 | 1.06E-95    |
| <b>FAM20C</b>     | FAM20C golgi associated secretory pathway kinase            | 1.6    | 8.45E-12    |
| <b>FAM229B</b>    | family with sequence similarity 229 member B                | 2.006  | 0.000000011 |
| <b>FAM89A</b>     | family with sequence similarity 89 member A                 | 3.648  | 4.36E-24    |
| <b>FAP</b>        | fibroblast activation protein alpha                         | 3.139  | 1.05E-26    |
| <b>FAS</b>        | Fas cell surface death receptor                             | 1.58   | 1.88E-11    |
| <b>FAT2</b>       | FAT atypical cadherin 2                                     | 55.643 | 1.27E-52    |

|                  |                                                        |         |             |
|------------------|--------------------------------------------------------|---------|-------------|
| <b>FAT3</b>      | FAT atypical cadherin 3                                | -2.128  | 1.11E-29    |
| <b>FBLN1</b>     | fibulin 1                                              | 1.808   | 1.06E-19    |
| <b>FBLN5</b>     | fibulin 5                                              | 8.105   | 3.81E-10    |
| <b>FBN1</b>      | fibrillin 1                                            | 1.662   | 7.59E-24    |
| <b>FBXO2</b>     | F-box protein 2                                        | 4.151   | 0.000000687 |
| <b>FBXO4</b>     | F-box protein 4                                        | -1.595  | 2.18E-08    |
| <b>FCGRT</b>     | Fc fragment of IgG receptor and transporter            | -2.166  | 1.01E-11    |
| <b>FCRLA</b>     | Fc receptor like A                                     | 3.263   | 0.0000468   |
| <b>FENDRR</b>    | FOXF1 adjacent non-coding developmental regulatory RNA | 31.188  | 6.63E-08    |
| <b>FER</b>       | FER tyrosine kinase                                    | -1.906  | 1.42E-19    |
| <b>FER1L4</b>    | fer-1 like family member 4 (pseudogene)                | 3.348   | 4.31E-25    |
| <b>FERMT3</b>    | fermitin family member 3                               | -2.183  | 0.0000879   |
| <b>FEZF1</b>     | FEZ family zinc finger 1                               | -3.705  | 0.00000267  |
| <b>FEZF1-AS1</b> | FEZF1 antisense RNA 1                                  | -4.052  | 1.14E-19    |
| <b>FGD6</b>      | FYVE, RhoGEF and PH domain containing 6                | 2.125   | 1.33E-11    |
| <b>FGFBP2</b>    | fibroblast growth factor binding protein 2             | -18.816 | 0.000000114 |
| <b>FHL1</b>      | four and a half LIM domains 1                          | 1.569   | 2.12E-17    |
| <b>FIBCD1</b>    | fibrinogen C domain containing 1                       | 3       | 4.69E-15    |
| <b>FIGN</b>      | fidgetin, microtubule severing factor                  | -1.581  | 1.8E-13     |
| <b>FILIP1</b>    | filamin A interacting protein 1                        | -2      | 5.94E-08    |
| <b>FKBP10</b>    | FKBP prolyl isomerase 10                               | -1.61   | 1.28E-11    |
| <b>FKBP14</b>    | FKBP prolyl isomerase 14                               | 1.629   | 2.08E-15    |
| <b>FLJ22447</b>  | uncharacterized LOC400221                              | 4.887   | 3.58E-40    |
| <b>FLRT2</b>     | fibronectin leucine rich transmembrane protein 2       | 2.523   | 5.77E-47    |
| <b>FLRT3</b>     | fibronectin leucine rich transmembrane protein 3       | -2.591  | 4.48E-40    |
| <b>FMN2</b>      | formin 2                                               | -2.078  | 2.37E-36    |
| <b>FMNL1</b>     | formin like 1                                          | 3.06    | 2.09E-77    |
| <b>FN1</b>       | fibronectin 1                                          | 1.697   | 9.78E-28    |
| <b>FOSB</b>      | FosB proto-oncogene, AP-1 transcription factor subunit | 2.626   | 1.07E-08    |
| <b>FOXA1</b>     | forkhead box A1                                        | -1.943  | 1.24E-13    |
| <b>FOXF1</b>     | forkhead box F1                                        | 9.586   | 7.82E-33    |
| <b>FOXF2</b>     | forkhead box F2                                        | 2.32    | 2.83E-14    |
| <b>FOXG1</b>     | forkhead box G1                                        | -1.723  | 2.56E-10    |
| <b>FOXQ1</b>     | forkhead box Q1                                        | 3.167   | 1.43E-13    |
| <b>FOXRED2</b>   | FAD dependent oxidoreductase domain containing 2       | -1.55   | 6.58E-14    |
| <b>FOXS1</b>     | forkhead box S1                                        | 9.543   | 5.26E-08    |
| <b>FPR1</b>      | formyl peptide receptor 1                              | 9.942   | 2.2E-53     |

|                |                                                             |        |             |
|----------------|-------------------------------------------------------------|--------|-------------|
| <b>FRAS1</b>   | Fraser extracellular matrix complex subunit 1               | 2.04   | 0.000294    |
| <b>FRMD3</b>   | FERM domain containing 3                                    | -1.778 | 1.17E-19    |
| <b>FSCN1</b>   | fascin actin-bundling protein 1                             | 3.05   | 2.99E-26    |
| <b>FSCN1P1</b> | fascin actin-bundling protein 1 pseudogene 1                | 4.125  | 0.0000015   |
| <b>FSIP1</b>   | fibrous sheath interacting protein 1                        | -1.808 | 0.000116    |
| <b>GABBR2</b>  | gamma-aminobutyric acid type B receptor subunit 2           | -1.682 | 0.00000111  |
| <b>GABRA3</b>  | gamma-aminobutyric acid type A receptor alpha3 subunit      | 2.966  | 0.00000669  |
| <b>GABRE</b>   | gamma-aminobutyric acid type A receptor epsilon subunit     | 6.304  | 3.84E-63    |
| <b>GACAT2</b>  | gastric cancer associated transcript 2                      | -2.708 | 0.0000538   |
| <b>GAL3ST4</b> | galactose-3-O-sulfotransferase 4                            | -2.252 | 0.0000359   |
| <b>GALNT12</b> | polypeptide N-acetylgalactosaminyltransferase 12            | -2.864 | 0.00119     |
| <b>GALNT18</b> | polypeptide N-acetylgalactosaminyltransferase 18            | 11.63  | 1.76E-13    |
| <b>GALNT6</b>  | polypeptide N-acetylgalactosaminyltransferase 6             | -3.171 | 3.65E-08    |
| <b>GAP43</b>   | growth associated protein 43                                | -2.792 | 2.47E-37    |
| <b>GAREM2</b>  | GRB2 associated regulator of MAPK1 subtype 2                | -3.312 | 2.31E-14    |
| <b>GAS1</b>    | growth arrest specific 1                                    | 2.653  | 3.98E-16    |
| <b>GAS6-DT</b> | GAS6 divergent transcript                                   | 2.79   | 4.33E-09    |
| <b>GAS7</b>    | growth arrest specific 7                                    | 2.09   | 5.69E-34    |
| <b>GATA2</b>   | GATA binding protein 2                                      | -1.565 | 0.0000426   |
| <b>GATA3</b>   | GATA binding protein 3                                      | -1.869 | 3.06E-18    |
| <b>GBP4</b>    | guanylate binding protein 4                                 | 4.338  | 7.62E-26    |
| <b>GCNT1</b>   | glucosaminyl (N-acetyl) transferase 1                       | 1.863  | 1.68E-30    |
| <b>GDPD5</b>   | glycerophosphodiester phosphodiesterase domain containing 5 | 2.645  | 3.1E-17     |
| <b>GFPT2</b>   | glutamine-fructose-6-phosphate transaminase 2               | 1.89   | 8.84E-42    |
| <b>GGT5</b>    | gamma-glutamyltransferase 5                                 | 4.015  | 0.000145    |
| <b>GIMAP2</b>  | GTPase, IMAP family member 2                                | 2.521  | 6.06E-12    |
| <b>GIMAP5</b>  | GTPase, IMAP family member 5                                | 36.918 | 2.29E-12    |
| <b>GIMAP6</b>  | GTPase, IMAP family member 6                                | 16.724 | 1.1E-63     |
| <b>GJA1</b>    | gap junction protein alpha 1                                | 1.752  | 3.97E-37    |
| <b>GJA3</b>    | gap junction protein alpha 3                                | 2.378  | 1.97E-11    |
| <b>GJB2</b>    | gap junction protein beta 2                                 | 2.138  | 5.13E-51    |
| <b>GLDC</b>    | glycine decarboxylase                                       | 2.071  | 1.16E-17    |
| <b>GLDN</b>    | gliomedin                                                   | -6.874 | 8.27E-17    |
| <b>GLIS1</b>   | GLIS family zinc finger 1                                   | -2.254 | 6.55E-08    |
| <b>GLP2R</b>   | glucagon like peptide 2 receptor                            | 12.327 | 2.63E-09    |
| <b>GLT8D2</b>  | glycosyltransferase 8 domain containing 2                   | 1.597  | 0.000000135 |
| <b>GLYATL1</b> | glycine-N-acyltransferase like 1                            | 2.351  | 0.000962    |

|                 |                                                                                    |        |             |
|-----------------|------------------------------------------------------------------------------------|--------|-------------|
| <b>GNAL</b>     | G protein subunit alpha L                                                          | 5.46   | 2.26E-25    |
| <b>GNAO1</b>    | G protein subunit alpha o1                                                         | 2.712  | 1.68E-24    |
| <b>GNG7</b>     | G protein subunit gamma 7                                                          | -3.954 | 5.1E-09     |
| <b>GOPC</b>     | golgi associated PDZ and coiled-coil motif containing                              | 1.625  | 2.46E-19    |
| <b>GPC4</b>     | glypican 4                                                                         | -1.591 | 6.39E-20    |
| <b>GPM6A</b>    | glycoprotein M6A                                                                   | -6.968 | 2.93E-213   |
| <b>GPM6B</b>    | glycoprotein M6B                                                                   | -1.915 | 2.23E-26    |
| <b>GPR1</b>     | G protein-coupled receptor 1                                                       | 3.746  | 0.00000465  |
| <b>GPR156</b>   | G protein-coupled receptor 156                                                     | -2.638 | 2.02E-08    |
| <b>GPR160</b>   | G protein-coupled receptor 160                                                     | 1.923  | 0.00000297  |
| <b>GPR63</b>    | G protein-coupled receptor 63                                                      | 2.205  | 5.08E-11    |
| <b>GPRC5B</b>   | G protein-coupled receptor class C group 5 member B                                | -1.988 | 1.22E-17    |
| <b>GPRC5C</b>   | G protein-coupled receptor class C group 5 member C                                | 15.858 | 0.000000102 |
| <b>GPX3</b>     | glutathione peroxidase 3                                                           | -2.987 | 9.17E-12    |
| <b>GRAMD1B</b>  | GRAM domain containing 1B                                                          | 1.758  | 0.000000263 |
| <b>GRIK4</b>    | glutamate ionotropic receptor kainate type subunit 4                               | 2.258  | 2.41E-11    |
| <b>GRIN2A</b>   | glutamate ionotropic receptor NMDA type subunit 2A                                 | 3.569  | 1.16E-12    |
| <b>GRIP1</b>    | glutamate receptor interacting protein 1                                           | 1.73   | 0.000000472 |
| <b>GRK5</b>     | G protein-coupled receptor kinase 5                                                | 1.568  | 2.1E-11     |
| <b>GRPR</b>     | gastrin releasing peptide receptor                                                 | -3.668 | 9.52E-25    |
| <b>GSDMC</b>    | gasdermin C                                                                        | 5.254  | 4.43E-11    |
| <b>GSN</b>      | gelsolin                                                                           | -1.654 | 1.25E-13    |
| <b>GULP1</b>    | GULP PTB domain containing engulfment adaptor 1                                    | -3.132 | 2.59E-56    |
| <b>GYG2</b>     | glycogenin 2                                                                       | -3.188 | 5.56E-13    |
| <b>H1-2</b>     | H1.2 linker histone, cluster member                                                | -1.618 | 2.57E-08    |
| <b>H1FX-AS1</b> | H1FX antisense RNA 1                                                               | -1.786 | 0.000147    |
| <b>H2AC6</b>    | H2A clustered histone 6                                                            | -1.967 | 3.62E-12    |
| <b>H3C4</b>     | H3 clustered histone 4                                                             | -2.702 | 0.00501     |
| <b>HAS3</b>     | hyaluronan synthase 3                                                              | 3.73   | 4.34E-100   |
| <b>HBEGF</b>    | heparin binding EGF like growth factor                                             | 1.54   | 1.97E-13    |
| <b>HCFC1R1</b>  | host cell factor C1 regulator 1                                                    | 1.604  | 1.67E-10    |
| <b>HCN2</b>     | hyperpolarization activated cyclic nucleotide gated potassium and sodium channel 2 | 2.797  | 3.76E-19    |
| <b>HDAC9</b>    | histone deacetylase 9                                                              | -1.874 | 1.02E-30    |
| <b>HEPH</b>     | hephaestin                                                                         | 1.657  | 1.78E-10    |
| <b>HERC5</b>    | HECT and RLD domain containing E3 ubiquitin protein ligase 5                       | 1.907  | 3.14E-19    |
| <b>HERC6</b>    | HECT and RLD domain containing E3 ubiquitin protein ligase family member 6         | 1.754  | 0.000000399 |
| <b>HES4</b>     | hes family bHLH transcription factor 4                                             | -2.308 | 0.000202    |

|                            |                                                                |        |             |
|----------------------------|----------------------------------------------------------------|--------|-------------|
| <b>HEY2</b>                | hes related family bHLH transcription factor with YRPW motif 2 | 3.85   | 4.08E-09    |
| <b>HHIP</b>                | hedgehog interacting protein                                   | 26.124 | 0.000000186 |
| <b>HIP1R</b>               | huntingtin interacting protein 1 related                       | 1.554  | 1.73E-08    |
| <b>HIVEP2</b>              | HIVEP zinc finger 2                                            | 1.89   | 2.4E-26     |
| <b>HLA-DPA1</b>            | major histocompatibility complex, class II, DP alpha 1         | 11.46  | 3E-21       |
| <b>HMGN5</b>               | high mobility group nucleosome binding domain 5                | 8.616  | 2.14E-53    |
| <b>HMOX1</b>               | heme oxygenase 1                                               | 2.063  | 8.58E-43    |
| <b>HOPX</b>                | HOP homeobox                                                   | -1.747 | 0.00014     |
| <b>HOXA7</b>               | homeobox A7                                                    | -2.562 | 0.0000462   |
| <b>HPS1</b>                | HPS1 biogenesis of lysosomal organelles complex 3 subunit 1    | -1.67  | 1.66E-10    |
| <b>HRAT17</b>              | heart tissue-associated transcript 17                          | -4.25  | 7.52E-09    |
| <b>HRH2</b>                | histamine receptor H2                                          | 22.904 | 2.61E-11    |
| <b>HS3ST1</b>              | heparan sulfate-glucosamine 3-sulfotransferase 1               | -2.187 | 0.000477    |
| <b>HS3ST3B1</b>            | heparan sulfate-glucosamine 3-sulfotransferase 3B1             | 1.699  | 7.8E-16     |
| <b>HSPA6</b>               | heat shock protein family A (Hsp70) member 6                   | 1.858  | 0.000000367 |
| <b>HTRA1</b>               | HtrA serine peptidase 1                                        | 1.637  | 1.22E-20    |
| <b>ICOSLG/LOC102723996</b> | inducible T cell costimulator ligand                           | 2.463  | 2.05E-36    |
| <b>ID3</b>                 | inhibitor of DNA binding 3, HLH protein                        | -1.602 | 1.42E-09    |
| <b>ID4</b>                 | inhibitor of DNA binding 4, HLH protein                        | 1.543  | 9.97E-11    |
| <b>IDO1</b>                | indoleamine 2,3-dioxygenase 1                                  | 5.39   | 2.38E-16    |
| <b>IFI44L</b>              | interferon induced protein 44 like                             | -1.643 | 7.91E-11    |
| <b>IFIT1</b>               | interferon induced protein with tetratricopeptide repeats 1    | 1.868  | 0.000000132 |
| <b>IFIT3</b>               | interferon induced protein with tetratricopeptide repeats 3    | 1.629  | 3.6E-10     |
| <b>IFITM10</b>             | interferon induced transmembrane protein 10                    | 1.919  | 8.72E-21    |
| <b>IFRD2</b>               | interferon related developmental regulator 2                   | -1.574 | 6.25E-09    |
| <b>IGFBP2</b>              | insulin like growth factor binding protein 2                   | -1.651 | 1.1E-12     |
| <b>IGFBP3</b>              | insulin like growth factor binding protein 3                   | 3.696  | 3.52E-125   |
| <b>IGFBP4</b>              | insulin like growth factor binding protein 4                   | 11.214 | 0           |
| <b>IGFBP5</b>              | insulin like growth factor binding protein 5                   | -2.43  | 1.78E-64    |
| <b>IGFBP6</b>              | insulin like growth factor binding protein 6                   | 1.699  | 3.04E-08    |
| <b>IGSF10</b>              | immunoglobulin superfamily member 10                           | 2.182  | 0.0000729   |
| <b>IKBIP</b>               | IKBKB interacting protein                                      | 1.589  | 2.89E-14    |
| <b>IKZF2</b>               | IKAROS family zinc finger 2                                    | 2.064  | 0.0000183   |
| <b>IL11</b>                | interleukin 11                                                 | 2.713  | 1.05E-38    |
| <b>IL13RA2</b>             | interleukin 13 receptor subunit alpha 2                        | 2.714  | 1.73E-60    |
| <b>IL15</b>                | interleukin 15                                                 | 1.911  | 0.00000469  |
| <b>IL15RA</b>              | interleukin 15 receptor subunit alpha                          | 2.697  | 4.51E-12    |

|                  |                                                                       |        |             |
|------------------|-----------------------------------------------------------------------|--------|-------------|
| <b>IL24</b>      | interleukin 24                                                        | 11.493 | 0.000000015 |
| <b>IL27RA</b>    | interleukin 27 receptor subunit alpha                                 | 1.964  | 1.95E-15    |
| <b>IL4R</b>      | interleukin 4 receptor                                                | 5.355  | 2.26E-51    |
| <b>IL7</b>       | interleukin 7                                                         | 2.553  | 5.47E-10    |
| <b>IMPDH1P10</b> | inosine monophosphate dehydrogenase 1 pseudogene 10                   | -2.311 | 0.000641    |
| <b>INAVA</b>     | innate immunity activator                                             | -2.805 | 0.000121    |
| <b>INPP1</b>     | inositol polyphosphate-1-phosphatase                                  | -1.551 | 4.03E-10    |
| <b>INPP5J</b>    | inositol polyphosphate-5-phosphatase J                                | -2.114 | 0.000592    |
| <b>IQGAP2</b>    | IQ motif containing GTPase activating protein 2                       | -2.482 | 2.78E-08    |
| <b>IRF1</b>      | interferon regulatory factor 1                                        | 2.014  | 6.06E-22    |
| <b>IRX1</b>      | iroquois homeobox 1                                                   | -1.913 | 0.00000314  |
| <b>ITGA1</b>     | integrin subunit alpha 1                                              | 2.22   | 6.49E-24    |
| <b>ITGA11</b>    | integrin subunit alpha 11                                             | 1.932  | 0.00000194  |
| <b>ITGA2</b>     | integrin subunit alpha 2                                              | 2.636  | 3.65E-71    |
| <b>ITGA9</b>     | integrin subunit alpha 9                                              | -1.728 | 1.47E-10    |
| <b>ITGB2</b>     | integrin subunit beta 2                                               | 2.405  | 0.00000294  |
| <b>ITGB3</b>     | integrin subunit beta 3                                               | 1.576  | 6.47E-13    |
| <b>ITGB4</b>     | integrin subunit beta 4                                               | 1.548  | 3.65E-10    |
| <b>ITGB6</b>     | integrin subunit beta 6                                               | 3.69   | 0.000102    |
| <b>ITGB8</b>     | integrin subunit beta 8                                               | -1.584 | 1.01E-15    |
| <b>ITGBL1</b>    | integrin subunit beta like 1                                          | -2.171 | 1.12E-21    |
| <b>JAG2</b>      | jagged canonical Notch ligand 2                                       | 5.436  | 3.04E-17    |
| <b>JAKMIP3</b>   | Janus kinase and microtubule interacting protein 3                    | 1.586  | 1.81E-08    |
| <b>JDP2</b>      | Jun dimerization protein 2                                            | 2.568  | 0.000000059 |
| <b>JMJD8</b>     | jumonji domain containing 8                                           | -1.64  | 5.28E-09    |
| <b>JUP</b>       | junction plakoglobin                                                  | -2.291 | 5.02E-09    |
| <b>KALRN</b>     | kalirin RhoGEF kinase                                                 | 1.784  | 3.52E-12    |
| <b>KCNAB2</b>    | potassium voltage-gated channel subfamily A regulatory beta subunit 2 | 3.027  | 1.04E-48    |
| <b>KCNB1</b>     | potassium voltage-gated channel subfamily B member 1                  | 18.182 | 1.5E-31     |
| <b>KCND3</b>     | potassium voltage-gated channel subfamily D member 3                  | -9.741 | 4.78E-26    |
| <b>KCNH5</b>     | potassium voltage-gated channel subfamily H member 5                  | -5.17  | 0.00000209  |
| <b>KCNIP3</b>    | potassium voltage-gated channel interacting protein 3                 | 2.718  | 4.02E-19    |
| <b>KCNIP4</b>    | potassium voltage-gated channel interacting protein 4                 | -2.48  | 1.04E-08    |
| <b>KCNJ2</b>     | potassium inwardly rectifying channel subfamily J member 2            | 1.66   | 8.81E-10    |
| <b>KCNK3</b>     | potassium two pore domain channel subfamily K member 3                | 3.288  | 0.00000167  |
| <b>KCNK5</b>     | potassium two pore domain channel subfamily K member 5                | 78.236 | 7.63E-40    |
| <b>KCNMA1</b>    | potassium calcium-activated channel subfamily M alpha 1               | 2.784  | 8.59E-119   |

|                  |                                                             |        |             |
|------------------|-------------------------------------------------------------|--------|-------------|
| <b>KCNN4</b>     | potassium calcium-activated channel subfamily N member 4    | 2.002  | 3.57E-29    |
| <b>KCTD12</b>    | potassium channel tetramerization domain containing 12      | -1.591 | 8.17E-17    |
| <b>KCTD15</b>    | potassium channel tetramerization domain containing 15      | -2.164 | 2.66E-44    |
| <b>KDEL3</b>     | KDEL endoplasmic reticulum protein retention receptor 3     | 2.249  | 6.64E-40    |
| <b>KDM5B</b>     | lysine demethylase 5B                                       | 1.675  | 2.3E-22     |
| <b>KIAA0319</b>  | KIAA0319                                                    | 1.699  | 0.0000179   |
| <b>KIF17</b>     | kinesin family member 17                                    | -2.513 | 0.000101    |
| <b>KIF7</b>      | kinesin family member 7                                     | -1.6   | 0.000000174 |
| <b>KIRREL3</b>   | kirre like nephrin family adhesion molecule 3               | -1.586 | 0.000000167 |
| <b>KITLG</b>     | KIT ligand                                                  | 2.171  | 2.84E-29    |
| <b>KLF17</b>     | Kruppel like factor 17                                      | 5.808  | 1.86E-18    |
| <b>KLHDC7A</b>   | kelch domain containing 7A                                  | 7.596  | 0.0000237   |
| <b>KLHL13</b>    | kelch like family member 13                                 | -1.612 | 5.86E-14    |
| <b>KRT13</b>     | keratin 13                                                  | -3.086 | 0.00169     |
| <b>KRT18</b>     | keratin 18                                                  | -1.756 | 1.48E-11    |
| <b>KRT81</b>     | keratin 81                                                  | -1.78  | 1.36E-11    |
| <b>KSR1</b>      | kinase suppressor of ras 1                                  | 1.763  | 1.55E-21    |
| <b>L1CAM</b>     | L1 cell adhesion molecule                                   | 4.844  | 1.93E-99    |
| <b>LAIR1</b>     | leukocyte associated immunoglobulin like receptor 1         | 14.254 | 3.1E-21     |
| <b>LAMA1</b>     | laminin subunit alpha 1                                     | 2.639  | 0.000093    |
| <b>LAMA2</b>     | laminin subunit alpha 2                                     | 2.611  | 1.1E-14     |
| <b>LAMC2</b>     | laminin subunit gamma 2                                     | 2.977  | 2.54E-21    |
| <b>LAPTM5</b>    | lysosomal protein transmembrane 5                           | 1.929  | 9.31E-16    |
| <b>LBH</b>       | LBH regulator of WNT signaling pathway                      | 2.17   | 0.000000162 |
| <b>LCP1</b>      | lymphocyte cytosolic protein 1                              | 1.71   | 7.12E-15    |
| <b>LDHA</b>      | lactate dehydrogenase A                                     | 1.667  | 2.89E-13    |
| <b>LGR4</b>      | leucine rich repeat containing G protein-coupled receptor 4 | 3.779  | 8.68E-63    |
| <b>LGR5</b>      | leucine rich repeat containing G protein-coupled receptor 5 | -3.714 | 3.42E-23    |
| <b>LHFPL4</b>    | LHFPL tetraspan subfamily member 4                          | 3.295  | 0.0000641   |
| <b>LIN7A</b>     | lin-7 homolog A, crumbs cell polarity complex component     | -2.969 | 0.00149     |
| <b>LINC00327</b> | long intergenic non-protein coding RNA 327                  | -1.893 | 0.000236    |
| <b>LINC00460</b> | long intergenic non-protein coding RNA 460                  | -1.81  | 0.00000666  |
| <b>LINC00461</b> | long intergenic non-protein coding RNA 461                  | -2.049 | 1.01E-36    |
| <b>LINC00565</b> | long intergenic non-protein coding RNA 565                  | 3.33   | 0.0000132   |
| <b>LINC00632</b> | long intergenic non-protein coding RNA 632                  | -2.134 | 0.00000176  |
| <b>LINC00639</b> | long intergenic non-protein coding RNA 639                  | -3.302 | 2.41E-25    |
| <b>LINC00707</b> | long intergenic non-protein coding RNA 707                  | -1.53  | 8.08E-13    |



|                     |                                                          |        |             |
|---------------------|----------------------------------------------------------|--------|-------------|
| <b>LINC00963</b>    | long intergenic non-protein coding RNA 963               | 1.633  | 3.63E-15    |
| <b>LINC01111</b>    | long intergenic non-protein coding RNA 1111              | -3.11  | 3.18E-10    |
| <b>LINC01303</b>    | long intergenic non-protein coding RNA 1303              | 2.979  | 9.37E-08    |
| <b>LINC01503</b>    | long intergenic non-protein coding RNA 1503              | 2.152  | 0.00000788  |
| <b>LINC01551</b>    | long intergenic non-protein coding RNA 1551              | -1.748 | 0.000000147 |
| <b>LINC02454</b>    | long intergenic non-protein coding RNA 2454              | 2.163  | 0.000235    |
| <b>LINC02535</b>    | long intergenic non-protein coding RNA 2535              | 1.913  | 0.0000379   |
| <b>LINC02547</b>    | long intergenic non-protein coding RNA 2547              | 2.387  | 0.000648    |
| <b>LINC02582</b>    | long intergenic non-protein coding RNA 2582              | 10.845 | 0.0000069   |
| <b>LINC02732</b>    |                                                          | -3.118 | 8.02E-17    |
| <b>LINGO2</b>       | leucine rich repeat and Ig domain containing 2           | -4.671 | 6.03E-08    |
| <b>LIPE</b>         | lipase E, hormone sensitive type                         | -2.664 | 4.79E-11    |
| <b>LIPG</b>         | lipase G, endothelial type                               | 2.63   | 0.0000533   |
| <b>LLGL2</b>        | LLGL scribble cell polarity complex component 2          | -3.339 | 2.3E-15     |
| <b>LMCD1</b>        | LIM and cysteine rich domains 1                          | -2.107 | 1.33E-22    |
| <b>LMO3</b>         | LIM domain only 3                                        | -2.687 | 4.14E-45    |
| <b>LNCAROD</b>      | lncRNA activating regulator of DKK1                      | -1.769 | 2.05E-18    |
| <b>LNCOG</b>        | lncRNA osteogenesis associated                           | 5.653  | 0.00000919  |
| <b>LOC100129534</b> | small nuclear ribonucleoprotein polypeptide N pseudogene | 3.424  | 3.51E-08    |
| <b>LOC100130283</b> | uncharacterized LOC100130283                             | 2.185  | 0.0000899   |
| <b>LOC100507516</b> | uncharacterized LOC100507516                             | -5.124 | 4.29E-48    |
| <b>LOC101927533</b> | uncharacterized LOC101927533                             | 5.909  | 0.000000504 |
| <b>LOC101928663</b> | uncharacterized LOC101928663                             | 2.373  | 3.44E-20    |
| <b>LOC102723834</b> | uncharacterized LOC102723834                             | 1.916  | 0.000043    |
| <b>LOC102724814</b> | uncharacterized LOC102724814                             | 1.671  | 0.000000487 |
| <b>LOC105369203</b> |                                                          | -2.467 | 2.98E-28    |
| <b>LOC105371795</b> |                                                          | 2.256  | 0.000000856 |
| <b>LOC107984895</b> | uncharacterized LOC107984895                             | 2.228  | 0.000645    |
| <b>LOC107984948</b> |                                                          | 2.913  | 2.1E-14     |
| <b>LOC283335</b>    | uncharacterized LOC283335                                | 1.856  | 0.0000729   |
| <b>LOC339192</b>    | uncharacterized LOC339192                                | 3.409  | 6.47E-10    |
| <b>LOC643201</b>    | centrosomal protein 192kDa pseudogene                    | 3.523  | 1.53E-44    |
| <b>LOX</b>          | lysyl oxidase                                            | 9.077  | 1.32E-160   |
| <b>LOXL1</b>        | lysyl oxidase like 1                                     | 2.736  | 2.92E-17    |
| <b>LOXL1-AS1</b>    | LOXL1 antisense RNA 1                                    | 4.089  | 4.66E-27    |
| <b>LOXL4</b>        | lysyl oxidase like 4                                     | -1.776 | 1.09E-15    |
| <b>LPAL2</b>        | lipoprotein(a) like 2, pseudogene                        | 10.188 | 6.68E-09    |

|                 |                                                                      |        |             |
|-----------------|----------------------------------------------------------------------|--------|-------------|
| <b>LPL</b>      | lipoprotein lipase                                                   | -2.39  | 3.25E-20    |
| <b>LPXN</b>     | leupaxin                                                             | 2.047  | 2.71E-36    |
| <b>LRAT</b>     | lecithin retinol acyltransferase                                     | -3.106 | 1.9E-33     |
| <b>LRATD2</b>   | LRAT domain containing 2                                             | -1.809 | 6.1E-23     |
| <b>LRP1</b>     | LDL receptor related protein 1                                       | 1.567  | 1.15E-11    |
| <b>LRP4-AS1</b> | LRP4 antisense RNA 1                                                 | 3.621  | 0.0000407   |
| <b>LRRC17</b>   | leucine rich repeat containing 17                                    | 6.193  | 1.96E-60    |
| <b>LRRC2</b>    | leucine rich repeat containing 2                                     | -2.526 | 2.34E-21    |
| <b>LRRC45</b>   | leucine rich repeat containing 45                                    | -1.941 | 0.000000315 |
| <b>LRRC8B</b>   | leucine rich repeat containing 8 VRAC subunit B                      | -2.349 | 2.9E-36     |
| <b>LSAMP</b>    | limbic system associated membrane protein                            | -1.89  | 0.000000359 |
| <b>LSMEM1</b>   | leucine rich single-pass membrane protein 1                          | 1.869  | 0.000379    |
| <b>LSP1</b>     | lymphocyte specific protein 1                                        | 5.478  | 0.000000169 |
| <b>LTBP1</b>    | latent transforming growth factor beta binding protein 1             | 2.53   | 6.61E-52    |
| <b>LTBP2</b>    | latent transforming growth factor beta binding protein 2             | 1.662  | 2.59E-08    |
| <b>LYPD1</b>    | LY6/PLAUR domain containing 1                                        | -1.737 | 2.93E-37    |
| <b>MAFB</b>     | MAF bZIP transcription factor B                                      | 2.972  | 0.000243    |
| <b>MAGEA12</b>  | MAGE family member A12                                               | 3.893  | 0.0000242   |
| <b>MAGEB6</b>   | MAGE family member B6                                                | 8.736  | 0.00000148  |
| <b>MAGEH1</b>   | MAGE family member H1                                                | 7.705  | 1.44E-66    |
| <b>MAGI2</b>    | membrane associated guanylate kinase, WW and PDZ domain containing 2 | -1.734 | 1.11E-12    |
| <b>MAMDC2</b>   | MAM domain containing 2                                              | 2.101  | 4.41E-50    |
| <b>MAN1A1</b>   | mannosidase alpha class 1A member 1                                  | 1.757  | 2.05E-23    |
| <b>MAOA</b>     | monoamine oxidase A                                                  | 4.884  | 0.00000178  |
| <b>MAP1A</b>    | microtubule associated protein 1A                                    | 1.568  | 1.37E-18    |
| <b>MAP3K7CL</b> | MAP3K7 C-terminal like                                               | 2.061  | 0.000273    |
| <b>MAP6</b>     | microtubule associated protein 6                                     | -2.76  | 0.0001      |
| <b>MARCHF1</b>  | membrane associated ring-CH-type finger 1                            | -2.174 | 8.82E-18    |
| <b>MARCHF10</b> | membrane associated ring-CH-type finger 10                           | -2.905 | 0.00000788  |
| <b>MAST4</b>    | microtubule associated serine/threonine kinase family member 4       | 2.215  | 7.04E-27    |
| <b>MATN2</b>    | matrilin 2                                                           | 3.153  | 6.26E-108   |
| <b>MATN3</b>    | matrilin 3                                                           | -2.846 | 0.00000142  |
| <b>MBL1P</b>    | mannose binding lectin 1, pseudogene                                 | 5.46   | 0.00000131  |
| <b>MBNL3</b>    | muscleblind like splicing regulator 3                                | -1.572 | 0.00000665  |
| <b>MC1R</b>     | melanocortin 1 receptor                                              | 2.066  | 2.06E-08    |
| <b>MCF2</b>     | MCF.2 cell line derived transforming sequence                        | -5.678 | 0.0000211   |
| <b>MCM5</b>     | minichromosome maintenance complex component 5                       | -1.858 | 2.79E-28    |

|                   |                                                                     |        |             |
|-------------------|---------------------------------------------------------------------|--------|-------------|
| <b>MCTP1</b>      | multiple C2 and transmembrane domain containing 1                   | 2.688  | 6.78E-27    |
| <b>MDGA1</b>      | MAM domain containing glycosylphosphatidylinositol anchor 1         | 2.486  | 3.48E-48    |
| <b>MDK</b>        | midkine                                                             | -4.537 | 3.19E-33    |
| <b>MEF2C</b>      | myocyte enhancer factor 2C                                          | -1.722 | 2.54E-10    |
| <b>MEG3</b>       | maternally expressed 3                                              | 1.899  | 4.77E-11    |
| <b>MEIS2</b>      | Meis homeobox 2                                                     | -1.623 | 2.27E-16    |
| <b>MEIS3P1</b>    | Meis homeobox 3 pseudogene 1                                        | -4.505 | 1.19E-21    |
| <b>MEIS3P2</b>    | Meis homeobox 3 pseudogene 2                                        | -2.907 | 0.000167    |
| <b>MELTF</b>      | melanotransferrin                                                   | -1.943 | 1.67E-08    |
| <b>MEST</b>       | mesoderm specific transcript                                        | 2.089  | 6.43E-47    |
| <b>MEX3B</b>      | mex-3 RNA binding family member B                                   | 1.696  | 0.000000166 |
| <b>MGC12916</b>   | uncharacterized protein MGC12916                                    | 2.336  | 9.33E-08    |
| <b>MGLL</b>       | monoglyceride lipase                                                | 2.107  | 4.07E-53    |
| <b>MGP</b>        | matrix Gla protein                                                  | 2.171  | 3.23E-39    |
| <b>MGST1</b>      | microsomal glutathione S-transferase 1                              | 1.541  | 1.79E-21    |
| <b>MIR100HG</b>   | mir-100-let-7a-2-mir-125b-1 cluster host gene                       | 2.035  | 4.77E-29    |
| <b>MIR503HG</b>   | MIR503 host gene                                                    | 1.963  | 1.15E-08    |
| <b>MIRLET7BHG</b> | MIRLET7B host gene                                                  | -1.588 | 6.55E-08    |
| <b>MKLN1-AS</b>   | MKLN1 antisense RNA                                                 | 1.84   | 0.00034     |
| <b>MME</b>        | membrane metalloendopeptidase                                       | 4.053  | 1.72E-72    |
| <b>MMP1</b>       | matrix metallopeptidase 1                                           | 9.258  | 1.88E-08    |
| <b>MMP14</b>      | matrix metallopeptidase 14                                          | 2.842  | 2.19E-100   |
| <b>MMP17</b>      | matrix metallopeptidase 17                                          | -3.875 | 1.58E-09    |
| <b>MMP2</b>       | matrix metallopeptidase 2                                           | 1.663  | 7.65E-23    |
| <b>MMP3</b>       | matrix metallopeptidase 3                                           | 6.528  | 6.1E-21     |
| <b>MMP7</b>       | matrix metallopeptidase 7                                           | 2.754  | 6.64E-38    |
| <b>MOXD1</b>      | monooxygenase DBH like 1                                            | -2.299 | 9.44E-71    |
| <b>MPP2</b>       | membrane palmitoylated protein 2                                    | -2.045 | 2.89E-16    |
| <b>MPP4</b>       | membrane palmitoylated protein 4                                    | 1.933  | 1.63E-08    |
| <b>MPP7</b>       | membrane palmitoylated protein 7                                    | 2.112  | 0.000011    |
| <b>MROCK1</b>     | MARCKS cis regulating lncRNA promoter of cytokines and inflammation | -3.483 | 3.81E-31    |
| <b>MSANTD2</b>    | Myb/SANT DNA binding domain containing 2                            | -1.692 | 2.13E-15    |
| <b>MSX2</b>       | msh homeobox 2                                                      | 1.804  | 0.000000333 |
| <b>MT-ND5</b>     | NADH dehydrogenase, subunit 5 (complex I)                           | 1.533  | 5.74E-17    |
| <b>MT-RNR1</b>    | s-rRNA                                                              | 2.141  | 7.48E-32    |
| <b>MT-RNR2</b>    | l-rRNA                                                              | 2.438  | 3.38E-90    |
| <b>MT-TT</b>      | tRNA                                                                | 2.442  | 0.000000839 |

|                  |                                                                   |        |             |
|------------------|-------------------------------------------------------------------|--------|-------------|
| <b>MT1E</b>      | metallothionein 1E                                                | -2.018 | 3.57E-16    |
| <b>MTCL1</b>     | microtubule crosslinking factor 1                                 | -1.794 | 5.13E-31    |
| <b>MTMR1</b>     | myotubularin related protein 1                                    | -2.111 | 1.39E-30    |
| <b>MTRNR2L1</b>  | MT-RNR2 like 1                                                    | 2.725  | 3.41E-15    |
| <b>MTRNR2L10</b> | MT-RNR2 like 10                                                   | 3.155  | 5.89E-17    |
| <b>MTRNR2L12</b> | MT-RNR2 like 12                                                   | 2.419  | 5.64E-37    |
| <b>MTRNR2L2</b>  | MT-RNR2 like 2                                                    | 2.107  | 1.31E-18    |
| <b>MTRNR2L8</b>  | MT-RNR2 like 8                                                    | 2.166  | 6.05E-15    |
| <b>MTSS1</b>     | MTSS I-BAR domain containing 1                                    | 12.624 | 9.27E-67    |
| <b>MTUS1</b>     | microtubule associated scaffold protein 1                         | 6.961  | 0.000000487 |
| <b>MUC1</b>      | mucin 1, cell surface associated                                  | 1.92   | 0.0000115   |
| <b>MYBL2</b>     | MYB proto-oncogene like 2                                         | -1.58  | 4.97E-15    |
| <b>MYD88</b>     | MYD88 innate immune signal transduction adaptor                   | -1.525 | 3.33E-14    |
| <b>MYEOV</b>     | myeloma overexpressed                                             | -2.16  | 1.42E-23    |
| <b>MYH15</b>     | myosin heavy chain 15                                             | 2.364  | 3.76E-10    |
| <b>MYH16</b>     | myosin heavy chain 16 pseudogene                                  | 3.412  | 0.000175    |
| <b>MYH3</b>      | myosin heavy chain 3                                              | 2.483  | 0.000000769 |
| <b>MYLK2</b>     | myosin light chain kinase 2                                       | 2.415  | 9.16E-13    |
| <b>MYO1D</b>     | myosin ID                                                         | 1.646  | 8.93E-10    |
| <b>MYO5C</b>     | myosin VC                                                         | -2.038 | 1.6E-14     |
| <b>MYOM1</b>     | myomesin 1                                                        | -3.455 | 0.0000616   |
| <b>MYOSLID</b>   |                                                                   | 1.815  | 0.000181    |
| <b>MYRF</b>      | myelin regulatory factor                                          | 1.792  | 1.52E-18    |
| <b>MZF1-AS1</b>  | MZF1 antisense RNA 1                                              | 2.525  | 7.41E-09    |
| <b>NACAD</b>     | NAC alpha domain containing                                       | -1.793 | 0.000000152 |
| <b>NALCN</b>     | sodium leak channel, non-selective                                | -2.354 | 6.78E-10    |
| <b>NANOS1</b>    | nanos C2HC-type zinc finger 1                                     | 4.114  | 0.000151    |
| <b>NAP1L2</b>    | nucleosome assembly protein 1 like 2                              | 4.014  | 1.3E-20     |
| <b>NAT8L</b>     | N-acetyltransferase 8 like                                        | 2.338  | 0.002       |
| <b>NCEH1</b>     | neutral cholesterol ester hydrolase 1                             | 1.592  | 1.17E-25    |
| <b>NDRG1</b>     | N-myc downstream regulated 1                                      | 1.766  | 9.39E-22    |
| <b>NDUFV2</b>    | NADH:ubiquinone oxidoreductase core subunit V2                    | 2.969  | 8.38E-09    |
| <b>NEDD4</b>     | NEDD4 E3 ubiquitin protein ligase                                 | -1.565 | 3.45E-19    |
| <b>NEDD9</b>     | neural precursor cell expressed, developmentally down-regulated 9 | -1.63  | 3.14E-19    |
| <b>NEGR1</b>     | neuronal growth regulator 1                                       | -1.797 | 8.82E-13    |
| <b>NEO1</b>      | neogenin 1                                                        | 2.588  | 5.02E-55    |
| <b>NES</b>       | nestin                                                            | -3.165 | 1.02E-132   |

|                  |                                                    |         |             |
|------------------|----------------------------------------------------|---------|-------------|
| <b>NEUROG2</b>   | neurogenin 2                                       | -4.847  | 0.000000577 |
| <b>NFASC</b>     | neurofascin                                        | 2.207   | 9.76E-42    |
| <b>NHS</b>       | NHS actin remodeling regulator                     | -1.787  | 9.47E-09    |
| <b>NIPAL2</b>    | NIPA like domain containing 2                      | -1.941  | 0.000114    |
| <b>NIPSNAP1</b>  | nipsnap homolog 1                                  | -2.235  | 5.17E-25    |
| <b>NISCH</b>     | nischarin                                          | -1.712  | 4.62E-18    |
| <b>NKAIN3</b>    | sodium/potassium transporting ATPase interacting 3 | -6.854  | 6.71E-12    |
| <b>NME3</b>      | NME/NM23 nucleoside diphosphate kinase 3           | -2.837  | 0.00000532  |
| <b>NNMT</b>      | nicotinamide N-methyltransferase                   | 1.944   | 7.01E-26    |
| <b>NOG</b>       | noggin                                             | 5.035   | 0.000000414 |
| <b>NOL6</b>      | nucleolar protein 6                                | -1.549  | 6.97E-17    |
| <b>NOTCH1</b>    | notch receptor 1                                   | -1.972  | 0.00000429  |
| <b>NPAS1</b>     | neuronal PAS domain protein 1                      | 2.012   | 0.00664     |
| <b>NPAS2</b>     | neuronal PAS domain protein 2                      | 2.581   | 1.87E-37    |
| <b>NPTXR</b>     | neuronal pentraxin receptor                        | 3.57    | 7.34E-13    |
| <b>NPY1R</b>     | neuropeptide Y receptor Y1                         | -3.858  | 2.11E-22    |
| <b>NR1D1</b>     | nuclear receptor subfamily 1 group D member 1      | 1.54    | 2.64E-14    |
| <b>NR1H4</b>     | nuclear receptor subfamily 1 group H member 4      | -23.037 | 1.32E-49    |
| <b>NRG2</b>      | neuregulin 2                                       | -1.876  | 5.2E-14     |
| <b>NRIP3</b>     | nuclear receptor interacting protein 3             | 1.64    | 5.85E-15    |
| <b>NRSN2-AS1</b> | NRSN2 antisense RNA 1                              | 2.599   | 0.00000168  |
| <b>NRXN3</b>     | neurexin 3                                         | -2.553  | 3.14E-11    |
| <b>NSUN5</b>     | NOP2/Sun RNA methyltransferase 5                   | -1.648  | 0.00000189  |
| <b>NT5C</b>      | 5', 3'-nucleotidase, cytosolic                     | -1.705  | 3.28E-08    |
| <b>NT5DC2</b>    | 5'-nucleotidase domain containing 2                | -1.875  | 9.09E-30    |
| <b>NTN1</b>      | netrin 1                                           | 3.519   | 7.4E-35     |
| <b>NTN4</b>      | netrin 4                                           | 2.895   | 2.11E-59    |
| <b>NTNG1</b>     | netrin G1                                          | 4.845   | 6.59E-71    |
| <b>NTNG2</b>     | netrin G2                                          | 2.751   | 3.37E-09    |
| <b>NTRK2</b>     | neurotrophic receptor tyrosine kinase 2            | 1.889   | 0.000000121 |
| <b>NTRK3</b>     | neurotrophic receptor tyrosine kinase 3            | -3.101  | 1.15E-40    |
| <b>NUDT11</b>    | nudix hydrolase 11                                 | 3.194   | 1.02E-09    |
| <b>NUDT16</b>    | nudix hydrolase 16                                 | -1.559  | 1.06E-16    |
| <b>NUDT16L1</b>  | nudix hydrolase 16 like 1                          | -1.655  | 0.00000947  |
| <b>NUDT4</b>     | nudix hydrolase 4                                  | -1.546  | 5E-17       |
| <b>NUP210</b>    | nucleoporin 210                                    | -1.827  | 2.9E-36     |
| <b>NXPH4</b>     | neurexophilin 4                                    | 2.286   | 2.25E-11    |

|                   |                                                         |        |             |
|-------------------|---------------------------------------------------------|--------|-------------|
| <b>OLFM1</b>      | olfactomedin 1                                          | 3.971  | 0.000229    |
| <b>OLFML2B</b>    | olfactomedin like 2B                                    | 1.821  | 2.77E-19    |
| <b>ONECUT1</b>    | one cut homeobox 1                                      | -4.508 | 0.000161    |
| <b>OPLAH</b>      | 5-oxoprolinase, ATP-hydrolysing                         | -1.943 | 0.000318    |
| <b>OPN3</b>       | opsin 3                                                 | -1.607 | 0.000000451 |
| <b>OSBPL10</b>    | oxysterol binding protein like 10                       | -1.537 | 1.15E-17    |
| <b>OTOGL</b>      | otogelin like                                           | -2.51  | 2.95E-18    |
| <b>OTULINL</b>    | OTU deubiquitinase with linear linkage specificity like | 2.152  | 8.2E-11     |
| <b>P3H2</b>       | prolyl 3-hydroxylase 2                                  | 1.872  | 2.43E-35    |
| <b>P4HA1</b>      | prolyl 4-hydroxylase subunit alpha 1                    | 1.613  | 1.17E-19    |
| <b>P4HA2</b>      | prolyl 4-hydroxylase subunit alpha 2                    | 1.842  | 1.71E-29    |
| <b>P4HA3</b>      | prolyl 4-hydroxylase subunit alpha 3                    | 3.319  | 0.0000226   |
| <b>P4HTM</b>      | prolyl 4-hydroxylase, transmembrane                     | -1.746 | 5.83E-13    |
| <b>PADI2</b>      | peptidyl arginine deiminase 2                           | -3.142 | 0.00145     |
| <b>PALM2AKAP2</b> | PALM2 and AKAP2 fusion                                  | 1.637  | 4.96E-09    |
| <b>PAPPA</b>      | pappalysin 1                                            | 1.582  | 6.52E-11    |
| <b>PAQR6</b>      | progesterone and adipoQ receptor family member 6        | 1.757  | 0.00000128  |
| <b>PARM1</b>      | prostate androgen-regulated mucin-like protein 1        | 29.036 | 4.38E-154   |
| <b>PAWR</b>       | pro-apoptotic WT1 regulator                             | -1.615 | 1.46E-13    |
| <b>PAX8</b>       | paired box 8                                            | 3.03   | 1.07E-29    |
| <b>PAX8-AS1</b>   | PAX8 antisense RNA 1                                    | 6.171  | 3.22E-23    |
| <b>PBX4</b>       | PBX homeobox 4                                          | -2.588 | 4.27E-09    |
| <b>PBXIP1</b>     | PBX homeobox interacting protein 1                      | 1.822  | 2.91E-21    |
| <b>PCDH1</b>      | protocadherin 1                                         | 2.063  | 2.03E-12    |
| <b>PCDH10</b>     | protocadherin 10                                        | -2.038 | 2.25E-28    |
| <b>PCDH18</b>     | protocadherin 18                                        | -1.713 | 0.00000656  |
| <b>PCDH20</b>     | protocadherin 20                                        | -15.77 | 2.73E-265   |
| <b>PCDHGC3</b>    | protocadherin gamma subfamily C, 3                      | 2.026  | 7.14E-37    |
| <b>PCDHGC5</b>    | protocadherin gamma subfamily C, 5                      | 2.403  | 1.96E-17    |
| <b>PDE1C</b>      | phosphodiesterase 1C                                    | -1.636 | 3.07E-28    |
| <b>PDE2A</b>      | phosphodiesterase 2A                                    | 4.094  | 4.79E-11    |
| <b>PDE3A</b>      | phosphodiesterase 3A                                    | 4.803  | 0.000108    |
| <b>PDE4A</b>      | phosphodiesterase 4A                                    | -3.09  | 5.34E-41    |
| <b>PDE4D</b>      | phosphodiesterase 4D                                    | 1.666  | 2.5E-11     |
| <b>PDE5A</b>      | phosphodiesterase 5A                                    | 6.322  | 6.2E-10     |
| <b>PDGFD</b>      | platelet derived growth factor D                        | 1.913  | 1.48E-23    |
| <b>PDGFRL</b>     | platelet derived growth factor receptor like            | 12.268 | 3.72E-17    |

|                   |                                                                        |        |             |
|-------------------|------------------------------------------------------------------------|--------|-------------|
| <b>PDK4</b>       | pyruvate dehydrogenase kinase 4                                        | 6.046  | 3.77E-30    |
| <b>PDPN</b>       | podoplanin                                                             | -2.411 | 0.000481    |
| <b>PDZD4</b>      | PDZ domain containing 4                                                | 2.672  | 8.04E-17    |
| <b>PEG10</b>      | paternally expressed 10                                                | -2.047 | 1.61E-65    |
| <b>PEG3</b>       | paternally expressed 3                                                 | 14.946 | 3.46E-52    |
| <b>PER1</b>       | period circadian regulator 1                                           | 1.652  | 3.05E-13    |
| <b>PER3</b>       | period circadian regulator 3                                           | 1.701  | 2.18E-21    |
| <b>PGM5</b>       | phosphoglucomutase 5                                                   | -2.547 | 0.00000413  |
| <b>PI3</b>        | peptidase inhibitor 3                                                  | 14.175 | 0.00000337  |
| <b>PICK1</b>      | protein interacting with PRKCA 1                                       | -2.245 | 2.59E-24    |
| <b>PIEZO2</b>     | piezo type mechanosensitive ion channel component 2                    | -3.945 | 1.4E-25     |
| <b>PIGZ</b>       | phosphatidylinositol glycan anchor biosynthesis class Z                | 3.724  | 1.16E-13    |
| <b>PIK3CD-AS2</b> | PIK3CD antisense RNA 2                                                 | -3.207 | 0.000198    |
| <b>PIK3CG</b>     | phosphatidylinositol-4,5-bisphosphate 3-kinase catalytic subunit gamma | 6.096  | 7.61E-09    |
| <b>PINK1</b>      | PTEN induced kinase 1                                                  | 1.621  | 3.66E-12    |
| <b>PITPNM3</b>    | PITPNM family member 3                                                 | 1.937  | 1.02E-12    |
| <b>PKN1</b>       | protein kinase N1                                                      | -1.643 | 1.49E-13    |
| <b>PKP2</b>       | plakophilin 2                                                          | -1.845 | 1.47E-20    |
| <b>PKP3</b>       | plakophilin 3                                                          | -4.249 | 0.000000994 |
| <b>PLAAT4</b>     | phospholipase A and acyltransferase 4                                  | 1.843  | 0.00000234  |
| <b>PLAC8</b>      | placenta associated 8                                                  | -5.335 | 3.99E-08    |
| <b>PLAT</b>       | plasminogen activator, tissue type                                     | -2.06  | 4.11E-39    |
| <b>PLAUR</b>      | plasminogen activator, urokinase receptor                              | 1.826  | 4.73E-29    |
| <b>PLCB4</b>      | phospholipase C beta 4                                                 | 2.301  | 1.54E-16    |
| <b>PLEKHA7</b>    | pleckstrin homology domain containing A7                               | -2.138 | 1.31E-11    |
| <b>PLEKHG4B</b>   | pleckstrin homology and RhoGEF domain containing G4B                   | 3.545  | 2.51E-11    |
| <b>PLP1</b>       | proteolipid protein 1                                                  | -3.082 | 0.00005     |
| <b>PLPP4</b>      | phospholipid phosphatase 4                                             | -1.586 | 0.000000109 |
| <b>PLSCR1</b>     | phospholipid scramblase 1                                              | -1.537 | 8.56E-14    |
| <b>PLSCR4</b>     | phospholipid scramblase 4                                              | 1.673  | 0.00000789  |
| <b>PLXNA4</b>     | plexin A4                                                              | 3.621  | 5.71E-17    |
| <b>PLXND1</b>     | plexin D1                                                              | -1.575 | 2.03E-13    |
| <b>PNMA2</b>      | PNMA family member 2                                                   | 2.731  | 3.43E-09    |
| <b>PODXL</b>      | podocalyxin like                                                       | 1.662  | 2.52E-30    |
| <b>PODXL2</b>     | podocalyxin like 2                                                     | 2.079  | 7.8E-16     |
| <b>POLR2J4</b>    | RNA polymerase II subunit J4, pseudogene                               | 3.691  | 0.00000864  |
| <b>POM121L9P</b>  | POM121 transmembrane nucleoporin like 9, pseudogene                    | 12.677 | 0.00000296  |

|                  |                                                                          |         |             |
|------------------|--------------------------------------------------------------------------|---------|-------------|
| <b>POSTN</b>     | periostin                                                                | -31.228 | 4.96E-40    |
| <b>POU3F2</b>    | POU class 3 homeobox 2                                                   | -1.668  | 4.05E-20    |
| <b>PPFIA2</b>    | PTPRF interacting protein alpha 2                                        | -2.108  | 3.57E-09    |
| <b>PPM1H</b>     | protein phosphatase, Mg <sup>2+</sup> /Mn <sup>2+</sup> dependent 1H     | 8.865   | 5.95E-24    |
| <b>PPM1M</b>     | protein phosphatase, Mg <sup>2+</sup> /Mn <sup>2+</sup> dependent 1M     | -2.315  | 1.12E-15    |
| <b>PPP1R35</b>   | protein phosphatase 1 regulatory subunit 35                              | -1.584  | 0.00000506  |
| <b>PPP1R3B</b>   | protein phosphatase 1 regulatory subunit 3B                              | 1.815   | 3.88E-15    |
| <b>PPP1R9A</b>   | protein phosphatase 1 regulatory subunit 9A                              | -1.641  | 9.62E-13    |
| <b>PPP2R2B</b>   | protein phosphatase 2 regulatory subunit Bbeta                           | -2.134  | 1.04E-49    |
| <b>PPP2R2C</b>   | protein phosphatase 2 regulatory subunit Bgamma                          | 13.437  | 1.03E-40    |
| <b>PPP4R4</b>    | protein phosphatase 4 regulatory subunit 4                               | 5.002   | 4.21E-10    |
| <b>PREX1</b>     | phosphatidylinositol-3,4,5-trisphosphate dependent Rac exchange factor 1 | 1.946   | 6.53E-26    |
| <b>PRKCZ</b>     | protein kinase C zeta                                                    | 2.462   | 1.12E-23    |
| <b>PRKD1</b>     | protein kinase D1                                                        | -1.613  | 8.21E-13    |
| <b>PRKG1</b>     | protein kinase cGMP-dependent 1                                          | 6.935   | 1.61E-13    |
| <b>PRLR</b>      | prolactin receptor                                                       | -1.819  | 2.93E-08    |
| <b>PROM2</b>     | prominin 2                                                               | 5.333   | 1.53E-08    |
| <b>PROX1</b>     | prospero homeobox 1                                                      | -2.021  | 5.96E-12    |
| <b>PRR16</b>     | proline rich 16                                                          | 2.149   | 6.96E-15    |
| <b>PRSS23</b>    | serine protease 23                                                       | 1.863   | 5.64E-37    |
| <b>PRSS35</b>    | serine protease 35                                                       | -2.011  | 4.01E-27    |
| <b>PRTN3</b>     | proteinase 3                                                             | 8.726   | 0.000713    |
| <b>PRUNE2</b>    | prune homolog 2 with BCH domain                                          | -3.102  | 1.55E-27    |
| <b>PSD4</b>      | pleckstrin and Sec7 domain containing 4                                  | 2.519   | 2.16E-26    |
| <b>PSG5</b>      | pregnancy specific beta-1-glycoprotein 5                                 | -5.356  | 0.000000121 |
| <b>PSG9</b>      | pregnancy specific beta-1-glycoprotein 9                                 | -2.526  | 0.0000565   |
| <b>PSMA2</b>     | proteasome subunit alpha 2                                               | 1.601   | 0.00000489  |
| <b>PTCH1</b>     | patched 1                                                                | -2.251  | 1.47E-09    |
| <b>PTK7</b>      | protein tyrosine kinase 7 (inactive)                                     | -1.628  | 7.96E-13    |
| <b>PTN</b>       | pleiotrophin                                                             | -1.615  | 4.31E-16    |
| <b>PTPRB</b>     | protein tyrosine phosphatase receptor type B                             | -2.343  | 1.51E-48    |
| <b>PTPRD</b>     | protein tyrosine phosphatase receptor type D                             | -2.278  | 0.00000198  |
| <b>PTPRE</b>     | protein tyrosine phosphatase receptor type E                             | 2.33    | 1.4E-33     |
| <b>PTPRG-AS1</b> | PTPRG antisense RNA 1                                                    | -1.904  | 0.000000046 |
| <b>PTPRU</b>     | protein tyrosine phosphatase receptor type U                             | 4.707   | 5.61E-64    |
| <b>PTPRZ1</b>    | protein tyrosine phosphatase receptor type Z1                            | -2.066  | 3.21E-17    |
| <b>PTTG1IP</b>   | PTTG1 interacting protein                                                | 1.52    | 6.67E-23    |



|                  |                                                            |        |             |
|------------------|------------------------------------------------------------|--------|-------------|
| <b>PTX3</b>      | pentraxin 3                                                | 1.716  | 1.38E-17    |
| <b>PXMP4</b>     | peroxisomal membrane protein 4                             | -1.726 | 1.09E-10    |
| <b>PXYLP1</b>    | 2-phosphoxylose phosphatase 1                              | 1.675  | 0.000000181 |
| <b>PYCR1</b>     | pyrroline-5-carboxylate reductase 1                        | -1.792 | 2.75E-15    |
| <b>RAB11FIP1</b> | RAB11 family interacting protein 1                         | 3.243  | 0.000129    |
| <b>RAB11FIP4</b> | RAB11 family interacting protein 4                         | -2.026 | 0.0000712   |
| <b>RAB29</b>     | RAB29, member RAS oncogene family                          | 1.553  | 3.23E-14    |
| <b>RAB3IL1</b>   | RAB3A interacting protein like 1                           | 1.738  | 0.00000104  |
| <b>RAB42</b>     | RAB42, member RAS oncogene family                          | -2.78  | 0.000011    |
| <b>RAB9B</b>     | RAB9B, member RAS oncogene family                          | 1.74   | 0.00000273  |
| <b>RAC3</b>      | Rac family small GTPase 3                                  | -1.66  | 0.000057    |
| <b>RADIL</b>     | Rap associating with DIL domain                            | 4.819  | 0.0000861   |
| <b>RADX</b>      | RPA1 related single stranded DNA binding protein, X-linked | 1.978  | 0.000000385 |
| <b>RAET1G</b>    | retinoic acid early transcript 1G                          | 2.661  | 1.66E-09    |
| <b>RANGRF</b>    | RAN guanine nucleotide release factor                      | -2.267 | 3.79E-31    |
| <b>RAP1GAP2</b>  | RAP1 GTPase activating protein 2                           | 3.607  | 7.98E-39    |
| <b>RAPGEF3</b>   | Rap guanine nucleotide exchange factor 3                   | 1.897  | 0.000535    |
| <b>RAPGEF4</b>   | Rap guanine nucleotide exchange factor 4                   | -2.171 | 6.56E-08    |
| <b>RARB</b>      | retinoic acid receptor beta                                | -1.562 | 3.38E-11    |
| <b>RASGRP3</b>   | RAS guanyl releasing protein 3                             | -1.759 | 2.84E-15    |
| <b>RBM47</b>     | RNA binding motif protein 47                               | 1.615  | 0.00000142  |
| <b>RCAN1</b>     | regulator of calcineurin 1                                 | 1.76   | 5.64E-27    |
| <b>REEP1</b>     | receptor accessory protein 1                               | 2.165  | 0.000000235 |
| <b>RFTN1</b>     | raftlin, lipid raft linker 1                               | 2.015  | 1.35E-11    |
| <b>RFX8</b>      | RFX family member 8, lacking RFX DNA binding domain        | 2.273  | 5.99E-25    |
| <b>RGMA</b>      | repulsive guidance molecule BMP co-receptor a              | -3.467 | 6.98E-29    |
| <b>RGS20</b>     | regulator of G protein signaling 20                        | 2.161  | 6.93E-18    |
| <b>RGS3</b>      | regulator of G protein signaling 3                         | 1.604  | 1.92E-19    |
| <b>RGS7</b>      | regulator of G protein signaling 7                         | -2.269 | 6.01E-24    |
| <b>RHBDL2</b>    | rhomboid like 2                                            | 1.717  | 0.000233    |
| <b>RHOBTB1</b>   | Rho related BTB domain containing 1                        | -1.594 | 1.39E-12    |
| <b>RHOBTB3</b>   | Rho related BTB domain containing 3                        | -1.526 | 1.12E-14    |
| <b>RHOJ</b>      | ras homolog family member J                                | -2.328 | 7.48E-50    |
| <b>RHOU</b>      | ras homolog family member U                                | 1.91   | 6.94E-20    |
| <b>RHOV</b>      | ras homolog family member V                                | 3.036  | 1.88E-08    |
| <b>RIMBP2</b>    | RIMS binding protein 2                                     | 19.767 | 2.35E-97    |
| <b>RIMKLA</b>    | ribosomal modification protein rimK like family member A   | 1.814  | 0.000581    |

|                      |                                                      |        |             |
|----------------------|------------------------------------------------------|--------|-------------|
| <b>RIMS3</b>         | regulating synaptic membrane exocytosis 3            | -2.057 | 5.57E-15    |
| <b>RIN2</b>          | Ras and Rab interactor 2                             | 1.604  | 4.16E-19    |
| <b>RIPOR2</b>        | RHO family interacting cell polarization regulator 2 | -4.657 | 1.62E-118   |
| <b>RN7SL689P</b>     | RNA, 7SL, cytoplasmic 689, pseudogene                | 2.649  | 0.000257    |
| <b>RNF112</b>        | ring finger protein 112                              | -3.492 | 2.85E-11    |
| <b>RNF144A</b>       | ring finger protein 144A                             | 1.575  | 2.5E-11     |
| <b>RNF152</b>        | ring finger protein 152                              | 2.16   | 0.000000102 |
| <b>RNF157</b>        | ring finger protein 157                              | -2.092 | 5.96E-26    |
| <b>RNF24</b>         | ring finger protein 24                               | 2.335  | 4.89E-59    |
| <b>ROR1</b>          | receptor tyrosine kinase like orphan receptor 1      | 2.115  | 6.3E-17     |
| <b>RORA</b>          | RAR related orphan receptor A                        | 4.863  | 2.14E-08    |
| <b>ROS1</b>          | ROS proto-oncogene 1, receptor tyrosine kinase       | 9.621  | 2.31E-95    |
| <b>RP11_1246C191</b> |                                                      | 1.833  | 1.04E-08    |
| <b>RP11_134G810</b>  |                                                      | 1.976  | 0.0000147   |
| <b>RP11_159D122</b>  |                                                      | 1.82   | 6.91E-08    |
| <b>RP11_21L232</b>   |                                                      | 2.674  | 0.000046    |
| <b>RP11_284F2110</b> |                                                      | 4.138  | 2.04E-73    |
| <b>RP11_284F217</b>  |                                                      | 3.318  | 1.08E-11    |
| <b>RP11_284F219</b>  |                                                      | 5.106  | 5.46E-12    |
| <b>RP11_320M162</b>  |                                                      | -4.077 | 4.44E-08    |
| <b>RP11_364B143</b>  |                                                      | -1.951 | 0.00159     |
| <b>RP11_404J231</b>  |                                                      | -1.663 | 0.000000347 |
| <b>RP11_4C204</b>    |                                                      | 2.795  | 0.000606    |
| <b>RP11_541N103</b>  |                                                      | 1.873  | 0.000283    |
| <b>RP11_77H95</b>    |                                                      | 5.426  | 0.0000502   |
| <b>RP11_888D104</b>  |                                                      | 2.477  | 0.000768    |
| <b>RP1_140K85</b>    |                                                      | 2.846  | 0.000256    |
| <b>RP4_773N104</b>   |                                                      | 1.59   | 1.63E-08    |
| <b>RP4_791C191</b>   |                                                      | -2.379 | 0.000187    |
| <b>RPS6KA2</b>       | ribosomal protein S6 kinase A2                       | 3.774  | 9.82E-55    |
| <b>RRAS2</b>         | RAS related 2                                        | 1.552  | 5.77E-11    |
| <b>RRBP1</b>         | ribosome binding protein 1                           | 1.54   | 5.59E-14    |
| <b>RTL9</b>          | retrotransposon Gag like 9                           | 2.219  | 2.84E-23    |
| <b>RTN2</b>          | reticulum 2                                          | 2.505  | 9.4E-17     |
| <b>RTN4RL1</b>       | reticulum 4 receptor like 1                          | 6.044  | 0.000000329 |
| <b>RTN4RL2</b>       | reticulum 4 receptor like 2                          | 3.527  | 0.0000504   |
| <b>RUVBL1</b>        | RuvB like AAA ATPase 1                               | -1.766 | 7.89E-21    |

|                 |                                               |         |             |
|-----------------|-----------------------------------------------|---------|-------------|
| <b>S100A2</b>   | S100 calcium binding protein A2               | 3.807   | 4.46E-68    |
| <b>S100A3</b>   | S100 calcium binding protein A3               | 2.288   | 0.000000338 |
| <b>S100A4</b>   | S100 calcium binding protein A4               | 3.119   | 4.4E-26     |
| <b>S100B</b>    | S100 calcium binding protein B                | -3.54   | 6.36E-78    |
| <b>SAA1</b>     | serum amyloid A1                              | 9.709   | 6.01E-11    |
| <b>SALL4</b>    | spalt like transcription factor 4             | -17.198 | 0.0000015   |
| <b>SAMD10</b>   | sterile alpha motif domain containing 10      | -1.711  | 0.00000168  |
| <b>SAMD11</b>   | sterile alpha motif domain containing 11      | -1.862  | 0.00000126  |
| <b>SAMD5</b>    | sterile alpha motif domain containing 5       | -3.018  | 4.55E-32    |
| <b>SAMD9L</b>   | sterile alpha motif domain containing 9 like  | 1.728   | 3.58E-18    |
| <b>SCAP</b>     | SREBF chaperone                               | -1.624  | 3.7E-13     |
| <b>SCD</b>      | stearoyl-CoA desaturase                       | 1.643   | 1.63E-24    |
| <b>SCNN1A</b>   | sodium channel epithelial 1 alpha subunit     | 4.96    | 1.39E-27    |
| <b>SCNN1B</b>   | sodium channel epithelial 1 beta subunit      | 3.244   | 9.33E-08    |
| <b>SCPEP1</b>   | serine carboxypeptidase 1                     | 1.675   | 2.76E-26    |
| <b>SDC1</b>     | syndecan 1                                    | 1.705   | 1.49E-18    |
| <b>SEL1L3</b>   | SEL1L family member 3                         | 2.012   | 2.08E-41    |
| <b>SELENOP</b>  | selenoprotein P                               | 3.23    | 7.1E-11     |
| <b>SELL</b>     | selectin L                                    | 2.228   | 0.000827    |
| <b>SEMA3B</b>   | semaphorin 3B                                 | -5.284  | 1.92E-45    |
| <b>SEMA3C</b>   | semaphorin 3C                                 | 1.751   | 7.87E-30    |
| <b>SEMA3F</b>   | semaphorin 3F                                 | 15.338  | 2.24E-62    |
| <b>SEMA4B</b>   | semaphorin 4B                                 | 1.7     | 7.73E-21    |
| <b>SEMA7A</b>   | semaphorin 7A (John Milton Hagen blood group) | 2.073   | 2.46E-42    |
| <b>SEPTIN3</b>  | septin 3                                      | 1.808   | 1.42E-08    |
| <b>SEPTIN6</b>  | septin 6                                      | 2.095   | 1.84E-19    |
| <b>SERBP1P1</b> | SERPINE1 mRNA binding protein 1 pseudogene 1  | -1.705  | 0.000000138 |
| <b>SERINC2</b>  | serine incorporator 2                         | 8.826   | 1.28E-112   |
| <b>SERPINA1</b> | serpin family A member 1                      | 2.641   | 2.26E-18    |
| <b>SERPINA5</b> | serpin family A member 5                      | 3.492   | 2.07E-15    |
| <b>SERPINE1</b> | serpin family E member 1                      | 1.891   | 7.97E-34    |
| <b>SERPINE2</b> | serpin family E member 2                      | 1.944   | 2.14E-43    |
| <b>SERPINH1</b> | serpin family H member 1                      | -2.076  | 7.29E-23    |
| <b>SESN2</b>    | sestrin 2                                     | 1.631   | 9.92E-08    |
| <b>SETBP1</b>   | SET binding protein 1                         | 1.558   | 3.77E-10    |
| <b>SEZ6L2</b>   | seizure related 6 homolog like 2              | 2.524   | 1.64E-18    |
| <b>SFRP1</b>    | secreted frizzled related protein 1           | 1.72    | 1.57E-15    |

|                   |                                                   |         |             |
|-------------------|---------------------------------------------------|---------|-------------|
| <b>SFTA1P</b>     | surfactant associated 1, pseudogene               | 100.677 | 2.21E-08    |
| <b>SGSH</b>       | N-sulfoglucosamine sulfohydrolase                 | -2.181  | 1.42E-30    |
| <b>SH3BGRL2</b>   | SH3 domain binding glutamate rich protein like 2  | 2.066   | 2.15E-10    |
| <b>SH3D21</b>     | SH3 domain containing 21                          | -2.999  | 8.97E-37    |
| <b>SH3GL3</b>     | SH3 domain containing GRB2 like 3, endophilin A3  | 4.54    | 2.29E-08    |
| <b>SH3PXD2A</b>   | SH3 and PX domains 2A                             | 2.046   | 6.73E-42    |
| <b>SHC2</b>       | SHC adaptor protein 2                             | -3.209  | 0.000000399 |
| <b>SHISA2</b>     | shisa family member 2                             | 2.003   | 0.00000164  |
| <b>SHISAL1</b>    | shisa like 1                                      | 6.728   | 3.75E-16    |
| <b>SIAE</b>       | sialic acid acetyltransferase                     | 1.562   | 5.89E-12    |
| <b>SIGLEC22P</b>  | sialic acid binding Ig like lectin 22, pseudogene | 10.781  | 1.06E-10    |
| <b>SIK1/SIK1B</b> | salt inducible kinase 1                           | 1.721   | 5.58E-13    |
| <b>SIPA1</b>      | signal-induced proliferation-associated 1         | -2.071  | 0.000000153 |
| <b>SLAIN1</b>     | SLAIN motif family member 1                       | -1.562  | 3.86E-14    |
| <b>SLC12A7</b>    | solute carrier family 12 member 7                 | 4.334   | 5.59E-31    |
| <b>SLC12A8</b>    | solute carrier family 12 member 8                 | -2.565  | 4.65E-09    |
| <b>SLC15A2</b>    | solute carrier family 15 member 2                 | 2.545   | 0.0000289   |
| <b>SLC16A14</b>   | solute carrier family 16 member 14                | -2.293  | 0.00000167  |
| <b>SLC16A2</b>    | solute carrier family 16 member 2                 | 1.628   | 2.51E-23    |
| <b>SLC16A7</b>    | solute carrier family 16 member 7                 | -2.334  | 0.000309    |
| <b>SLC16A9</b>    | solute carrier family 16 member 9                 | -3.059  | 3.69E-68    |
| <b>SLC17A5</b>    | solute carrier family 17 member 5                 | 1.595   | 3.12E-08    |
| <b>SLC1A1</b>     | solute carrier family 1 member 1                  | 1.91    | 2.79E-10    |
| <b>SLC20A1</b>    | solute carrier family 20 member 1                 | 1.519   | 5.97E-22    |
| <b>SLC22A4</b>    | solute carrier family 22 member 4                 | 2.126   | 2.09E-13    |
| <b>SLC25A23</b>   | solute carrier family 25 member 23                | 2.019   | 4.32E-35    |
| <b>SLC25A27</b>   | solute carrier family 25 member 27                | 7.436   | 2.27E-12    |
| <b>SLC25A28</b>   | solute carrier family 25 member 28                | -1.667  | 7.94E-15    |
| <b>SLC25A29</b>   | solute carrier family 25 member 29                | 1.731   | 2.86E-15    |
| <b>SLC26A11</b>   | solute carrier family 26 member 11                | -2.256  | 1.2E-16     |
| <b>SLC27A6</b>    | solute carrier family 27 member 6                 | -3.04   | 0.000208    |
| <b>SLC29A4</b>    | solute carrier family 29 member 4                 | 1.723   | 0.000791    |
| <b>SLC2A12</b>    | solute carrier family 2 member 12                 | 7       | 8.06E-51    |
| <b>SLC2A13</b>    | solute carrier family 2 member 13                 | 6.809   | 5.66E-27    |
| <b>SLC2A3</b>     | solute carrier family 2 member 3                  | 1.608   | 7.01E-12    |
| <b>SLC30A3</b>    | solute carrier family 30 member 3                 | 4.602   | 5.92E-10    |
| <b>SLC35F1</b>    | solute carrier family 35 member F1                | -1.837  | 0.00012     |

|                  |                                                                 |         |             |
|------------------|-----------------------------------------------------------------|---------|-------------|
| <b>SLC37A2</b>   | solute carrier family 37 member 2                               | 2.422   | 7.71E-09    |
| <b>SLC38A11</b>  | solute carrier family 38 member 11                              | 3.982   | 2.47E-28    |
| <b>SLC38A2</b>   | solute carrier family 38 member 2                               | 1.714   | 6.14E-22    |
| <b>SLC38A3</b>   | solute carrier family 38 member 3                               | 4.593   | 3.58E-29    |
| <b>SLC39A8</b>   | solute carrier family 39 member 8                               | 1.825   | 2.95E-18    |
| <b>SLC40A1</b>   | solute carrier family 40 member 1                               | -2.673  | 0.000000272 |
| <b>SLC43A1</b>   | solute carrier family 43 member 1                               | 1.772   | 0.00041     |
| <b>SLC44A3</b>   | solute carrier family 44 member 3                               | 2.381   | 0.00106     |
| <b>SLC44A5</b>   | solute carrier family 44 member 5                               | -7.144  | 1.28E-24    |
| <b>SLC7A11</b>   | solute carrier family 7 member 11                               | -2.003  | 2.7E-25     |
| <b>SLC8A1</b>    | solute carrier family 8 member A1                               | 4.034   | 3.02E-87    |
| <b>SLCO4A1</b>   | solute carrier organic anion transporter family member 4A1      | 5.766   | 7.93E-91    |
| <b>SLCO5A1</b>   | solute carrier organic anion transporter family member 5A1      | -2.195  | 9.25E-17    |
| <b>SLIT2</b>     | slit guidance ligand 2                                          | -1.801  | 1.23E-38    |
| <b>SLIT3</b>     | slit guidance ligand 3                                          | -1.789  | 2.3E-15     |
| <b>SLPI</b>      | secretory leukocyte peptidase inhibitor                         | 151.869 | 2.22E-154   |
| <b>SMAD1</b>     | SMAD family member 1                                            | -1.569  | 0.000000554 |
| <b>SMIM25</b>    | small integral membrane protein 25                              | 2.735   | 8.86E-10    |
| <b>SMPDL3B</b>   | sphingomyelin phosphodiesterase acid like 3B                    | 3.108   | 0.0000339   |
| <b>SMTN</b>      | smoothelin                                                      | -1.607  | 5.75E-08    |
| <b>SNHG19</b>    | small nucleolar RNA host gene 19                                | -1.706  | 0.00000245  |
| <b>SNHG25</b>    |                                                                 | -2.296  | 0.00000186  |
| <b>SNHG9</b>     | small nucleolar RNA host gene 9                                 | -1.671  | 0.000048    |
| <b>SOCS2</b>     | suppressor of cytokine signaling 2                              | -2.038  | 1.84E-31    |
| <b>SOCS2-AS1</b> | SOCS2 antisense RNA 1                                           | -1.882  | 2.54E-10    |
| <b>SOCS5</b>     | suppressor of cytokine signaling 5                              | 1.565   | 4.54E-16    |
| <b>SORBS2</b>    | sorbin and SH3 domain containing 2                              | -1.556  | 5.96E-10    |
| <b>SORBS3</b>    | sorbin and SH3 domain containing 3                              | -1.589  | 2.27E-16    |
| <b>SORCS2</b>    | sortilin related VPS10 domain containing receptor 2             | 12.847  | 4.26E-94    |
| <b>SOX13</b>     | SRY-box transcription factor 13                                 | -1.897  | 2.16E-32    |
| <b>SOX2</b>      | SRY-box transcription factor 2                                  | -1.684  | 2.25E-16    |
| <b>SOX2-OT</b>   | SOX2 overlapping transcript                                     | -5.92   | 1.18E-191   |
| <b>SPAG17</b>    | sperm associated antigen 17                                     | -2.195  | 2.2E-22     |
| <b>SPATC1L</b>   | spermatogenesis and centriole associated 1 like                 | -2.395  | 6.71E-10    |
| <b>SPINT1</b>    | serine peptidase inhibitor, Kunitz type 1                       | -1.966  | 0.000272    |
| <b>SPOCK1</b>    | SPARC (osteonectin), cwcv and kazal like domains proteoglycan 1 | -1.736  | 3.34E-30    |
| <b>SPP1</b>      | secreted phosphoprotein 1                                       | -2.283  | 4.95E-61    |

|                 |                                                               |        |             |
|-----------------|---------------------------------------------------------------|--------|-------------|
| <b>SPSB1</b>    | splA/ryanodine receptor domain and SOCS box containing 1      | 3.28   | 1.33E-51    |
| <b>SPTB</b>     | spectrin beta, erythrocytic                                   | 1.621  | 0.000000256 |
| <b>SPTBN4</b>   | spectrin beta, non-erythrocytic 4                             | -3.629 | 0.000141    |
| <b>SQOR</b>     | sulfide quinone oxidoreductase                                | 1.871  | 1.33E-14    |
| <b>SRSF12</b>   | serine and arginine rich splicing factor 12                   | -3.288 | 6.53E-08    |
| <b>SSBP3</b>    | single stranded DNA binding protein 3                         | 1.551  | 1.91E-13    |
| <b>SSC5D</b>    | scavenger receptor cysteine rich family member with 5 domains | 3.656  | 3.28E-16    |
| <b>SSH3</b>     | slingshot protein phosphatase 3                               | -1.571 | 1.58E-08    |
| <b>ST8SIA1</b>  | ST8 alpha-N-acetyl-neuraminide alpha-2,8-sialyltransferase 1  | 2.597  | 0.000362    |
| <b>ST8SIA4</b>  | ST8 alpha-N-acetyl-neuraminide alpha-2,8-sialyltransferase 4  | 2.396  | 0.000125    |
| <b>STAC</b>     | SH3 and cysteine rich domain                                  | -1.687 | 7.87E-23    |
| <b>STAMBPL1</b> | STAM binding protein like 1                                   | -1.612 | 2.52E-13    |
| <b>STARD4</b>   | StAR related lipid transfer domain containing 4               | 1.764  | 0.000000331 |
| <b>STC1</b>     | stanniocalcin 1                                               | 1.966  | 1.43E-40    |
| <b>STEAP1</b>   | STEAP family member 1                                         | 4.484  | 1.5E-20     |
| <b>STEAP2</b>   | STEAP2 metalloredutase                                        | 2.513  | 0.00000971  |
| <b>STK17A</b>   | serine/threonine kinase 17a                                   | 1.798  | 1.21E-29    |
| <b>STK32B</b>   | serine/threonine kinase 32B                                   | -1.905 | 1.88E-11    |
| <b>STMN3</b>    | stathmin 3                                                    | 2.641  | 1.76E-25    |
| <b>STOM</b>     | stomatin                                                      | -1.907 | 1.26E-34    |
| <b>STON2</b>    | stonin 2                                                      | 1.753  | 3.78E-12    |
| <b>STRA6</b>    | stimulated by retinoic acid 6                                 | -2.502 | 2.43E-25    |
| <b>STX1A</b>    | syntaxin 1A                                                   | 1.555  | 4.99E-09    |
| <b>STXBP6</b>   | syntaxin binding protein 6                                    | 1.755  | 0.0000001   |
| <b>SULF1</b>    | sulfatase 1                                                   | -6.024 | 7.78E-106   |
| <b>SULF2</b>    | sulfatase 2                                                   | 1.628  | 3.75E-21    |
| <b>SURF2</b>    | surfeit 2                                                     | -1.647 | 0.00195     |
| <b>SUSD1</b>    | sushi domain containing 1                                     | -2.177 | 7.78E-09    |
| <b>SUSD2</b>    | sushi domain containing 2                                     | 4.342  | 5.75E-16    |
| <b>SUSD4</b>    | sushi domain containing 4                                     | 2.333  | 0.00000178  |
| <b>SUSD6</b>    | sushi domain containing 6                                     | 1.553  | 1.31E-09    |
| <b>SV2A</b>     | synaptic vesicle glycoprotein 2A                              | -1.557 | 2.88E-11    |
| <b>SYNC</b>     | syncoilin, intermediate filament protein                      | 1.591  | 4.69E-14    |
| <b>SYNE3</b>    | spectrin repeat containing nuclear envelope family member 3   | -2.172 | 0.000118    |
| <b>SYNGR1</b>   | synaptogyrin 1                                                | -2.895 | 2.01E-11    |
| <b>SYNPO</b>    | synaptopodin                                                  | 2.261  | 3.17E-47    |
| <b>SYTL2</b>    | synaptotagmin like 2                                          | 2.276  | 5.05E-19    |

|                |                                                      |        |             |
|----------------|------------------------------------------------------|--------|-------------|
| <b>TACR1</b>   | tachykinin receptor 1                                | 1.902  | 4.9E-14     |
| <b>TAGLN</b>   | transgelin                                           | -1.707 | 0.00000949  |
| <b>TBC1D4</b>  | TBC1 domain family member 4                          | 2.196  | 3.21E-35    |
| <b>TBC1D8</b>  | TBC1 domain family member 8                          | 1.693  | 8.46E-10    |
| <b>TBC1D8B</b> | TBC1 domain family member 8B                         | 1.988  | 1.71E-09    |
| <b>TCHH</b>    | trichohyalin                                         | 2.622  | 0.000124    |
| <b>TCN1</b>    | transcobalamin 1                                     | 2.896  | 4.33E-23    |
| <b>TDP1</b>    | tyrosyl-DNA phosphodiesterase 1                      | -1.652 | 1.41E-15    |
| <b>TDRP</b>    | testis development related protein                   | 1.634  | 0.0000115   |
| <b>TEF</b>     | TEF transcription factor, PAR bZIP family member     | 2.278  | 3.33E-38    |
| <b>TENM2</b>   | teneurin transmembrane protein 2                     | 1.597  | 3.26E-23    |
| <b>TENM4</b>   | teneurin transmembrane protein 4                     | 1.556  | 1.97E-13    |
| <b>TESK2</b>   | testis associated actin remodelling kinase 2         | 1.863  | 0.000000481 |
| <b>TEX15</b>   | testis expressed 15, meiosis and synapsis associated | 3.867  | 0.00000574  |
| <b>TEX9</b>    | testis expressed 9                                   | 1.614  | 0.00000617  |
| <b>TFAP2B</b>  | transcription factor AP-2 beta                       | -2.351 | 0.000808    |
| <b>TFAP2C</b>  | transcription factor AP-2 gamma                      | -1.655 | 7.95E-28    |
| <b>TFB1M</b>   | transcription factor B1, mitochondrial               | -1.576 | 9.48E-11    |
| <b>TFCP2L1</b> | transcription factor CP2 like 1                      | 2.958  | 8.95E-10    |
| <b>TFEB</b>    | transcription factor EB                              | 2.023  | 8.39E-15    |
| <b>TFPI</b>    | tissue factor pathway inhibitor                      | 1.613  | 3.24E-13    |
| <b>TGFB2</b>   | transforming growth factor beta 2                    | 1.642  | 2.78E-14    |
| <b>TGFB3</b>   | transforming growth factor beta 3                    | 2.487  | 3E-27       |
| <b>TGFBR3</b>  | transforming growth factor beta receptor 3           | 2.115  | 0.00228     |
| <b>TGM2</b>    | transglutaminase 2                                   | -1.531 | 9.53E-13    |
| <b>THEMIS2</b> | thymocyte selection associated family member 2       | -4.431 | 0.000000736 |
| <b>THNSL2</b>  | threonine synthase like 2                            | -5.221 | 1.42E-14    |
| <b>THSD1</b>   | thrombospondin type 1 domain containing 1            | 2.725  | 6.68E-40    |
| <b>TIAM1</b>   | T cell lymphoma invasion and metastasis 1            | 1.752  | 3.87E-16    |
| <b>TIMP3</b>   | TIMP metalloproteinase inhibitor 3                   | 1.564  | 1.79E-11    |
| <b>TIMP4</b>   | TIMP metalloproteinase inhibitor 4                   | 1.767  | 0.000000222 |
| <b>TKTL1</b>   | transketolase like 1                                 | 4.137  | 2.4E-41     |
| <b>TLR1</b>    | toll like receptor 1                                 | 2.275  | 3.33E-09    |
| <b>TLR3</b>    | toll like receptor 3                                 | 2.388  | 0.000318    |
| <b>TLR4</b>    | toll like receptor 4                                 | -1.777 | 9.19E-29    |
| <b>TLR6</b>    | toll like receptor 6                                 | 1.794  | 1.24E-14    |
| <b>TM4SF18</b> | transmembrane 4 L six family member 18               | 2.881  | 7.03E-25    |

|                  |                                                                        |         |             |
|------------------|------------------------------------------------------------------------|---------|-------------|
| <b>TMC7</b>      | transmembrane channel like 7                                           | 1.924   | 0.00000016  |
| <b>TMEFF2</b>    | transmembrane protein with EGF like and two follistatin like domains 2 | 1.873   | 8.99E-08    |
| <b>TMEM100</b>   | transmembrane protein 100                                              | -4.2    | 1.13E-10    |
| <b>TMEM143</b>   | transmembrane protein 143                                              | 1.773   | 0.000000305 |
| <b>TMEM158</b>   | transmembrane protein 158 (gene/pseudogene)                            | 3.944   | 7.84E-121   |
| <b>TMEM171</b>   | transmembrane protein 171                                              | -3.871  | 1.06E-09    |
| <b>TMEM173</b>   | transmembrane protein 173                                              | 1.702   | 3.7E-09     |
| <b>TMEM179</b>   | transmembrane protein 179                                              | 4.897   | 3.82E-15    |
| <b>TMEM200A</b>  | transmembrane protein 200A                                             | -2.303  | 0.000799    |
| <b>TMEM200C</b>  | transmembrane protein 200C                                             | -2.099  | 1.28E-22    |
| <b>TMEM205</b>   | transmembrane protein 205                                              | -1.701  | 1.46E-13    |
| <b>TMEM220</b>   | transmembrane protein 220                                              | -2.363  | 0.000000766 |
| <b>TMEM229B</b>  | transmembrane protein 229B                                             | -3.001  | 0.00000127  |
| <b>TMEM25</b>    | transmembrane protein 25                                               | -3.12   | 1.18E-13    |
| <b>TMEM255A</b>  | transmembrane protein 255A                                             | 2.295   | 8.73E-08    |
| <b>TMEM255B</b>  | transmembrane protein 255B                                             | 9.693   | 9.56E-27    |
| <b>TMEM26</b>    | transmembrane protein 26                                               | -2.605  | 0.00015     |
| <b>TMEM38A</b>   | transmembrane protein 38A                                              | 1.694   | 0.00000191  |
| <b>TMEM45A</b>   | transmembrane protein 45A                                              | -1.532  | 1.14E-14    |
| <b>TMEM51</b>    | transmembrane protein 51                                               | 1.553   | 1.38E-09    |
| <b>TMEM63C</b>   | transmembrane protein 63C                                              | -6.501  | 7.19E-08    |
| <b>TMEM71</b>    | transmembrane protein 71                                               | 2.699   | 5.45E-22    |
| <b>TMSB15A</b>   | thymosin beta 15a                                                      | 4.421   | 2.51E-18    |
| <b>TMTC1</b>     | transmembrane O-mannosyltransferase targeting cadherins 1              | 2.138   | 8.45E-35    |
| <b>TMTC4</b>     | transmembrane O-mannosyltransferase targeting cadherins 4              | -1.9    | 6.69E-24    |
| <b>TNC</b>       | tenascin C                                                             | 1.697   | 6.6E-25     |
| <b>TNFAIP3</b>   | TNF alpha induced protein 3                                            | 1.55    | 5.86E-10    |
| <b>TNFAIP6</b>   | TNF alpha induced protein 6                                            | 3.289   | 0.000000937 |
| <b>TNFRSF11B</b> | TNF receptor superfamily member 11b                                    | 222.216 | 5.42E-18    |
| <b>TNFRSF21</b>  | TNF receptor superfamily member 21                                     | 3.604   | 2.06E-118   |
| <b>TNFSF10</b>   | TNF superfamily member 10                                              | 3.24    | 2.4E-41     |
| <b>TNFSF4</b>    | TNF superfamily member 4                                               | -11.65  | 3.61E-140   |
| <b>TNNT1</b>     | troponin T1, slow skeletal type                                        | 2.432   | 1.62E-16    |
| <b>TOX</b>       | thymocyte selection associated high mobility group box                 | 2.204   | 1.1E-13     |
| <b>TP53I11</b>   | tumor protein p53 inducible protein 11                                 | 3.572   | 1.11E-82    |
| <b>TPPP</b>      | tubulin polymerization promoting protein                               | 4.229   | 9.65E-22    |
| <b>TPRG1</b>     | tumor protein p63 regulated 1                                          | 3.311   | 4.12E-10    |



|                  |                                                                  |         |             |
|------------------|------------------------------------------------------------------|---------|-------------|
| <b>TRABD2A</b>   | TraB domain containing 2A                                        | 4.818   | 3.55E-57    |
| <b>TRAPPC9</b>   | trafficking protein particle complex 9                           | -1.818  | 2.01E-18    |
| <b>TRERF1</b>    | transcriptional regulating factor 1                              | 1.58    | 2.58E-13    |
| <b>TRIM24</b>    | tripartite motif containing 24                                   | -1.534  | 5.75E-18    |
| <b>TRIM29</b>    | tripartite motif containing 29                                   | 57.105  | 3.16E-17    |
| <b>TRIM38</b>    | tripartite motif containing 38                                   | -1.82   | 1.85E-09    |
| <b>TRIM6</b>     | tripartite motif containing 6                                    | 3.217   | 6.42E-13    |
| <b>TRNP1</b>     | TMF1 regulated nuclear protein 1                                 | 1.853   | 1.16E-12    |
| <b>TRPM3</b>     | transient receptor potential cation channel subfamily M member 3 | -4.248  | 2.79E-27    |
| <b>TSHZ2</b>     | teashirt zinc finger homeobox 2                                  | 6.009   | 3.59E-15    |
| <b>TSKU</b>      | tsukushi, small leucine rich proteoglycan                        | 1.908   | 1.98E-15    |
| <b>TSPAN1</b>    | tetraspanin 1                                                    | 3.103   | 2.66E-08    |
| <b>TSPAN12</b>   | tetraspanin 12                                                   | 8.052   | 3.53E-13    |
| <b>TSPAN13</b>   | tetraspanin 13                                                   | 1.602   | 4.77E-16    |
| <b>TSPAN15</b>   | tetraspanin 15                                                   | -1.618  | 1.19E-14    |
| <b>TSPAN2</b>    | tetraspanin 2                                                    | -1.736  | 3.54E-13    |
| <b>TSPAN9</b>    | tetraspanin 9                                                    | 1.594   | 8.68E-18    |
| <b>TSTD1</b>     | thiosulfate sulfurtransferase like domain containing 1           | -2.546  | 3.29E-15    |
| <b>TTBK1</b>     | tau tubulin kinase 1                                             | -4.513  | 4.79E-29    |
| <b>TTC39A</b>    | tetratricopeptide repeat domain 39A                              | -2.705  | 0.000397    |
| <b>TTC3P1</b>    | tetratricopeptide repeat domain 3 pseudogene 1                   | 2.416   | 6.44E-34    |
| <b>TTC6</b>      | tetratricopeptide repeat domain 6                                | -5.327  | 1.66E-09    |
| <b>TTYH2</b>     | tweety family member 2                                           | 1.961   | 0.000311    |
| <b>TUBB2B</b>    | tubulin beta 2B class IIb                                        | -2.6    | 4.38E-27    |
| <b>TUBB4A</b>    | tubulin beta 4A class IVa                                        | 2.371   | 5.68E-09    |
| <b>TXK</b>       | TXK tyrosine kinase                                              | -3.695  | 6.4E-16     |
| <b>TYMSOS</b>    | TYMS opposite strand                                             | -2.258  | 0.00000234  |
| <b>UBE2L6</b>    | ubiquitin conjugating enzyme E2 L6                               | 1.581   | 0.000000032 |
| <b>UCA1</b>      | urothelial cancer associated 1                                   | 161.643 | 6.16E-47    |
| <b>UCP2</b>      | uncoupling protein 2                                             | 1.622   | 2.21E-11    |
| <b>UNC5B</b>     | unc-5 netrin receptor B                                          | 2.1     | 0.000144    |
| <b>USP43</b>     | ubiquitin specific peptidase 43                                  | 3.451   | 0.0000197   |
| <b>VAC14-AS1</b> | VAC14 antisense RNA 1                                            | 3.813   | 0.0000133   |
| <b>VAT1L</b>     | vesicle amine transport 1 like                                   | -6.721  | 2.55E-21    |
| <b>VCAM1</b>     | vascular cell adhesion molecule 1                                | -2.68   | 9.51E-08    |
| <b>VCAN</b>      | versican                                                         | -1.625  | 1.96E-19    |
| <b>VDR</b>       | vitamin D receptor                                               | 2.198   | 1.79E-21    |

|                  |                                                                    |        |             |
|------------------|--------------------------------------------------------------------|--------|-------------|
| <b>VEGFA</b>     | vascular endothelial growth factor A                               | 2.153  | 9.84E-61    |
| <b>VEGFC</b>     | vascular endothelial growth factor C                               | 1.619  | 1.88E-17    |
| <b>VEPH1</b>     | ventricular zone expressed PH domain containing 1                  | 1.862  | 5.55E-13    |
| <b>VGLL3</b>     | vestigial like family member 3                                     | -1.815 | 0.0000268   |
| <b>VIT</b>       | vitrin                                                             | -3.433 | 3.5E-33     |
| <b>VMAC</b>      | vimentin type intermediate filament associated coiled-coil protein | -1.648 | 1.92E-09    |
| <b>VPS35L</b>    | VPS35 endosomal protein sorting factor like                        | -2.131 | 4.57E-19    |
| <b>VSIG10L</b>   | V-set and immunoglobulin domain containing 10 like                 | 2.263  | 0.0000763   |
| <b>VSNL1</b>     | visinin like 1                                                     | -1.793 | 3.62E-12    |
| <b>VSTM4</b>     | V-set and transmembrane domain containing 4                        | 4.545  | 0.0000423   |
| <b>VWA5A</b>     | von Willebrand factor A domain containing 5A                       | 2.46   | 8.12E-11    |
| <b>VWCE</b>      | von Willebrand factor C and EGF domains                            | 3.982  | 2.19E-08    |
| <b>VWDE</b>      | von Willebrand factor D and EGF domains                            | -2.023 | 6.44E-16    |
| <b>WIPI1</b>     | WD repeat domain, phosphoinositide interacting 1                   | 1.774  | 1.87E-11    |
| <b>WNT5B</b>     | Wnt family member 5B                                               | 2.005  | 8.21E-23    |
| <b>WNT7B</b>     | Wnt family member 7B                                               | 2.028  | 0.0000648   |
| <b>WWC3</b>      | WWC family member 3                                                | -1.529 | 2E-14       |
| <b>XAF1</b>      | XIAP associated factor 1                                           | 2.54   | 0.000000137 |
| <b>XBP1</b>      | X-box binding protein 1                                            | 1.565  | 9.34E-15    |
| <b>XDH</b>       | xanthine dehydrogenase                                             | 4.296  | 3.26E-65    |
| <b>XKR4</b>      | XK related 4                                                       | -2.449 | 1.9E-14     |
| <b>XPC</b>       | XPC complex subunit, DNA damage recognition and repair factor      | -1.529 | 3.52E-10    |
| <b>YPEL3</b>     | yippee like 3                                                      | -2.222 | 0.00000198  |
| <b>ZBTB20</b>    | zinc finger and BTB domain containing 20                           | -1.786 | 0.000229    |
| <b>ZBTB46</b>    | zinc finger and BTB domain containing 46                           | 1.746  | 0.000716    |
| <b>ZBTB47</b>    | zinc finger and BTB domain containing 47                           | -1.599 | 0.0000187   |
| <b>ZC3H12B</b>   | zinc finger CCCH-type containing 12B                               | 2.843  | 1.51E-08    |
| <b>ZCWPW1</b>    | zinc finger CW-type and PWWP domain containing 1                   | 1.905  | 0.00000949  |
| <b>ZDHHC23</b>   | zinc finger DHHC-type containing 23                                | -1.554 | 1.06E-10    |
| <b>ZEB1</b>      | zinc finger E-box binding homeobox 1                               | 1.534  | 1.12E-14    |
| <b>ZFHX4-AS1</b> | ZFHX4 antisense RNA 1                                              | -3.914 | 7.41E-26    |
| <b>ZFPM2-AS1</b> | ZFPM2 antisense RNA 1                                              | -1.913 | 0.00000706  |
| <b>ZFYVE28</b>   | zinc finger FYVE-type containing 28                                | 2.372  | 0.000000808 |
| <b>ZIC2</b>      | Zic family member 2                                                | 8.119  | 1.08E-11    |
| <b>ZIC5</b>      | Zic family member 5                                                | 4.072  | 0.000000228 |
| <b>ZMAT1</b>     | zinc finger matrin-type 1                                          | 9.174  | 0.000000246 |
| <b>ZMIZ1</b>     | zinc finger MIZ-type containing 1                                  | 1.556  | 1.42E-15    |

|                  |                                           |        |             |
|------------------|-------------------------------------------|--------|-------------|
| <b>ZMIZ1-AS1</b> | ZMIZ1 antisense RNA 1                     | 2.293  | 4.25E-11    |
| <b>ZNF239</b>    | zinc finger protein 239                   | -1.603 | 0.000019    |
| <b>ZNF467</b>    | zinc finger protein 467                   | 10.496 | 0.00000151  |
| <b>ZNF506</b>    | zinc finger protein 506                   | -2.025 | 1.9E-12     |
| <b>ZNF512</b>    | zinc finger protein 512                   | 2.105  | 1.97E-26    |
| <b>ZNF536</b>    | zinc finger protein 536                   | 3.378  | 0.000000185 |
| <b>ZNF620</b>    | zinc finger protein 620                   | -1.966 | 1.41E-10    |
| <b>ZNF660</b>    | zinc finger protein 660                   | -5.464 | 1.3E-09     |
| <b>ZNF665</b>    | zinc finger protein 665                   | -2.087 | 0.000482    |
| <b>ZNF702P</b>   | zinc finger protein 702, pseudogene       | -2.699 | 3.03E-09    |
| <b>ZNF793</b>    | zinc finger protein 793                   | -2.513 | 2.09E-10    |
| <b>ZNF853</b>    | zinc finger protein 853                   | -3.612 | 2.92E-29    |
| <b>ZNF879</b>    | zinc finger protein 879                   | 1.973  | 0.0000116   |
| <b>ZP1</b>       | zona pellucida glycoprotein 1             | 3.13   | 0.00000888  |
| <b>ZSCAN5A</b>   | zinc finger and SCAN domain containing 5A | 1.955  | 0.000000373 |
| <b>ZSWIM4</b>    | zinc finger SWIM-type containing 4        | 1.774  | 6.64E-14    |
| <b>ZSWIM5</b>    | zinc finger SWIM-type containing 5        | -1.744 | 1.32E-09    |
