# Supplementary material for: mTORC2/Rac1 Pathway Predisposes Cancer Aggressiveness in IDH1-Mutated Glioma
Source: MDPI journal article supplement (doi:10.3390/cancers12040787), 2020-03-26
Supplement: s1 [file s1]

Supplementary Table 4. List of differentially expressed cell movement related genes in U251 IDH1 R132C compared with U251 IDH1 WT

| Gene Symbol | Entrez Gene Name                               | Fold Change | FDR         |
|-------------|------------------------------------------------|-------------|-------------|
| A2M         | alpha-2-macroglobulin                          | 3.563       | 6.56E-133   |
| ABCA1       | ATP binding cassette subfamily A member 1      | 1.722       | 2.68E-27    |
| ABCB4       | ATP binding cassette subfamily B member 4      | -21.743     | 1.71E-09    |
| ACKR3       | atypical chemokine receptor 3                  | 9.625       | 5.48E-16    |
| ACTA2       | actin alpha 2, smooth muscle                   | 1.784       | 9.07E-13    |
| ADGRG1      | adhesion G protein-coupled receptor G1         | 1.776       | 1.13E-27    |
| ADRB2       | adrenoceptor beta 2                            | 3.608       | 2.78E-11    |
| AHNAK       | AHNAK nucleoprotein                            | 1.597       | 2.68E-14    |
| AJAP1       | adherens junctions associated protein 1        | -1.892      | 0.000267    |
| ALK         | ALK receptor tyrosine kinase                   | -3.611      | 7.55E-17    |
| AMOT        | angiomin                                       | -1.883      | 1.14E-27    |
| ANGPTL4     | angiopoietin like 4                            | 6.849       | 1.41E-21    |
| APLN        | apelin                                         | -1.897      | 0.000000293 |
| ARHGAP4     | Rho GTPase activating protein 4                | 2.338       | 0.00107     |
| ARHGAP24    | Rho GTPase activating protein 24               | 24.153      | 6.13E-36    |
| ARRB1       | arrestin beta 1                                | 2.74        | 3.02E-17    |
| ASIC1       | acid sensing ion channel subunit 1             | 1.884       | 4.82E-10    |
| ATOH8       | atonal bHLH transcription factor 8             | -3.426      | 2.2E-10     |
| ATP8A1      | ATPase phospholipid transporting 8A1           | 4.495       | 0.00000661  |
| BCAN        | brevican                                       | 4.138       | 2.04E-73    |
| BCAR3       | BCAR3 adaptor protein, NSP family member       | 1.87        | 4.25E-34    |
| BCAT1       | branched chain amino acid transaminase 1       | -1.565      | 1.62E-14    |
| BHLHE40     | basic helix-loop-helix family member e40       | 1.798       | 3.36E-31    |
| BHLHE41     | basic helix-loop-helix family member e41       | 2.204       | 2.43E-33    |
| BMP4        | bone morphogenetic protein 4                   | 13.466      | 2.1E-16     |
| BST2        | bone marrow stromal cell antigen 2             | 3.008       | 0.000132    |
| C3          | complement C3                                  | 8.149       | 9.18E-33    |
| C3AR1       | complement C3a receptor 1                      | 2.708       | 0.00015     |
| CACNA1E     | calcium voltage-gated channel subunit alpha1 E | 5.434       | 0.000000298 |
| CALCRL      | calcitonin receptor like receptor              | 1.813       | 0.000799    |
| CASP1       | caspase 1                                      | 1.686       | 0.000112    |
| CBS/CBSL    | cystathionine beta-synthase                    | -1.611      | 0.00000209  |
| CCN2        | cellular communication network factor 2        | -1.719      | 1.31E-41    |
| CCN3        | cellular communication network factor 3        | 8.762       | 0.000000414 |
| CD55        | CD55 molecule (Cromer blood group)             | 6.505       | 7.89E-34    |

|         |                                                       |         |            |
|---------|-------------------------------------------------------|---------|------------|
| CD82    | CD82 molecule                                         | 3.469   | 5.08E-106  |
| CD93    | CD93 molecule                                         | 5.317   | 4.73E-13   |
| CD200   | CD200 molecule                                        | -3.566  | 4.24E-24   |
| CD274   | CD274 molecule                                        | -1.775  | 4.28E-21   |
| CDKN1A  | cyclin dependent kinase inhibitor 1A                  | 2.463   | 1.04E-50   |
| CEBPD   | CCAAT enhancer binding protein delta                  | 1.822   | 0.0016     |
| CELSR2  | cadherin EGF LAG seven-pass G-type receptor 2         | -1.773  | 6.12E-21   |
| CEMIP   | cell migration inducing hyaluronidase 1               | 2.056   | 3.7E-15    |
| CGA     | glycoprotein hormones, alpha polypeptide              | -4.097  | 6.74E-10   |
| CHFR    | checkpoint with forkhead and ring finger domains      | -2.15   | 8.44E-14   |
| CHI3L1  | chitinase 3 like 1                                    | 106.661 | 0          |
| CHST1   | carbohydrate sulfotransferase 1                       | 1.606   | 0.0000284  |
| CLCA2   | chloride channel accessory 2                          | 7.544   | 8.21E-17   |
| CLU     | clusterin                                             | 2.3     | 3.06E-31   |
| CMTM8   | CKLF like MARVEL transmembrane domain containing 8    | -2.096  | 1.11E-17   |
| CNR1    | cannabinoid receptor 1                                | -4.256  | 4.75E-127  |
| CNTNAP2 | contactin associated protein like 2                   | 4.58    | 5.84E-22   |
| COL11A1 | collagen type XI alpha 1 chain                        | -1.771  | 3.56E-30   |
| COL17A1 | collagen type XVII alpha 1 chain                      | 3.338   | 2.25E-76   |
| CPEB1   | cytoplasmic polyadenylation element binding protein 1 | 2.093   | 2.03E-09   |
| CRMP1   | collapsin response mediator protein 1                 | 2.615   | 0.00000184 |
| CRYAB   | crystallin alpha B                                    | -3.99   | 2.82E-91   |
| CSF1    | colony stimulating factor 1                           | 1.911   | 2.78E-32   |
| CSF2    | colony stimulating factor 2                           | 3.184   | 3.28E-09   |
| CTNNA2  | catenin alpha 2                                       | -3.887  | 1.07E-48   |
| CTNND2  | catenin delta 2                                       | -2.368  | 2.61E-26   |
| CTSH    | cathepsin H                                           | 1.948   | 7.06E-29   |
| CTSS    | cathepsin S                                           | 2.789   | 7.73E-22   |
| CXADR   | CXADR Ig-like cell adhesion molecule                  | 1.947   | 1.92E-19   |
| CXCL12  | C-X-C motif chemokine ligand 12                       | 6.535   | 1.97E-39   |
| CYP2C8  | cytochrome P450 family 2 subfamily C member 8         | 4.168   | 0.0000372  |
| DAB1    | DAB adaptor protein 1                                 | -2.113  | 0.000701   |
| DDIT4   | DNA damage inducible transcript 4                     | 1.64    | 4.43E-09   |
| DGKE    | diacylglycerol kinase epsilon                         | 1.736   | 0.0000241  |
| DIO2    | iodothyronine deiodinase 2                            | -2.407  | 1.51E-27   |
| DLC1    | DLC1 Rho GTPase activating protein                    | 2.454   | 5.33E-33   |
| DLL1    | delta like canonical Notch ligand 1                   | 3.502   | 1.33E-14   |

|          |                                                                       |        |             |
|----------|-----------------------------------------------------------------------|--------|-------------|
| DMBT1    | deleted in malignant brain tumors 1                                   | 4.286  | 0.000000135 |
| DNM1     | dynamin 1                                                             | 1.585  | 1.16E-17    |
| DOCK3    | dedicator of cytokinesis 3                                            | 1.69   | 0.000000233 |
| DOCK4    | dedicator of cytokinesis 4                                            | 2.152  | 8.42E-37    |
| DRD2     | dopamine receptor D2                                                  | 1.596  | 2.41E-17    |
| DSE      | dermatan sulfate epimerase                                            | 2.15   | 1.46E-24    |
| DUSP1    | dual specificity phosphatase 1                                        | 1.538  | 7.83E-12    |
| DUSP10   | dual specificity phosphatase 10                                       | 1.904  | 5.14E-19    |
| EBF1     | EBF transcription factor 1                                            | 1.756  | 0.0000748   |
| ECSCR    | endothelial cell surface expressed chemotaxis and apoptosis regulator | 5.299  | 5.33E-13    |
| EDIL3    | EGF like repeats and discoidin domains 3                              | 2.962  | 5.07E-58    |
| EDN1     | endothelin 1                                                          | -2.198 | 4.08E-37    |
| EDNRB    | endothelin receptor type B                                            | -1.653 | 1.8E-10     |
| EEF1A2   | eukaryotic translation elongation factor 1 alpha 2                    | 2.135  | 1.18E-22    |
| EFNA1    | ephrin A1                                                             | 2.769  | 1.33E-12    |
| EFNA4    | ephrin A4                                                             | 1.642  | 0.0000207   |
| ELMO1    | engulfment and cell motility 1                                        | 1.675  | 1.11E-12    |
| EN1      | engrailed homeobox 1                                                  | -1.664 | 4.09E-08    |
| ENPP2    | ectonucleotide pyrophosphatase/phosphodiesterase 2                    | 8.436  | 9.52E-10    |
| EPAS1    | endothelial PAS domain protein 1                                      | 2.353  | 4.19E-62    |
| EPB41L4B | erythrocyte membrane protein band 4.1 like 4B                         | 2.883  | 4.79E-37    |
| EPHA3    | EPH receptor A3                                                       | -2.238 | 3.18E-61    |
| EPHA4    | EPH receptor A4                                                       | -1.887 | 5E-10       |
| EPHB2    | EPH receptor B2                                                       | 2.672  | 7.39E-82    |
| ERAP1    | endoplasmic reticulum aminopeptidase 1                                | 1.659  | 1.85E-22    |
| EYA2     | EYA transcriptional coactivator and phosphatase 2                     | 2.641  | 0.000207    |
| F3       | coagulation factor III, tissue factor                                 | -1.814 | 6.8E-26     |
| F11R     | F11 receptor                                                          | -2.053 | 6.97E-15    |
| FABP7    | fatty acid binding protein 7                                          | -1.763 | 7.25E-25    |
| FAP      | fibroblast activation protein alpha                                   | 3.139  | 1.05E-26    |
| FAS      | Fas cell surface death receptor                                       | 1.58   | 1.88E-11    |
| FAT3     | FAT atypical cadherin 3                                               | -2.128 | 1.11E-29    |
| FBLN5    | fibulin 5                                                             | 8.105  | 3.81E-10    |
| FBN1     | fibrillin 1                                                           | 1.662  | 7.59E-24    |
| FBXO4    | F-box protein 4                                                       | -1.595 | 2.18E-08    |
| FER      | FER tyrosine kinase                                                   | -1.906 | 1.42E-19    |
| FERMT3   | fermitin family member 3                                              | -2.183 | 0.0000879   |

|                     |                                                                |        |            |
|---------------------|----------------------------------------------------------------|--------|------------|
| FEZF1               | FEZ family zinc finger 1                                       | -3.705 | 0.00000267 |
| FHL1                | four and a half LIM domains 1                                  | 1.569  | 2.12E-17   |
| FLRT2               | fibronectin leucine rich transmembrane protein 2               | 2.523  | 5.77E-47   |
| FN1                 | fibronectin 1                                                  | 1.697  | 9.78E-28   |
| FOSB                | FosB proto-oncogene, AP-1 transcription factor subunit         | 2.626  | 1.07E-08   |
| FOXA1               | forkhead box A1                                                | -1.943 | 1.24E-13   |
| FOXF1               | forkhead box F1                                                | 9.586  | 7.82E-33   |
| FOXF2               | forkhead box F2                                                | 2.32   | 2.83E-14   |
| FOXG1               | forkhead box G1                                                | -1.723 | 2.56E-10   |
| FOXQ1               | forkhead box Q1                                                | 3.167  | 1.43E-13   |
| FPR1                | formyl peptide receptor 1                                      | 9.942  | 2.2E-53    |
| FSCN1               | fascin actin-bundling protein 1                                | 3.05   | 2.99E-26   |
| GATA2               | GATA binding protein 2                                         | -1.565 | 0.0000426  |
| GATA3               | GATA binding protein 3                                         | -1.869 | 3.06E-18   |
| GCNT1               | glucosaminyl (N-acetyl) transferase 1                          | 1.863  | 1.68E-30   |
| GGT5                | gamma-glutamyltransferase 5                                    | 4.015  | 0.000145   |
| GJA1                | gap junction protein alpha 1                                   | 1.752  | 3.97E-37   |
| GJB2                | gap junction protein beta 2                                    | 2.138  | 5.13E-51   |
| GNAO1               | G protein subunit alpha o1                                     | 2.712  | 1.68E-24   |
| GPM6A               | glycoprotein M6A                                               | -6.968 | 2.93E-213  |
| GSN                 | gelsolin                                                       | -1.654 | 1.25E-13   |
| HAS3                | hyaluronan synthase 3                                          | 3.73   | 4.34E-100  |
| HBEGF               | heparin binding EGF like growth factor                         | 1.54   | 1.97E-13   |
| HDAC9               | histone deacetylase 9                                          | -1.874 | 1.02E-30   |
| HEY2                | hes related family bHLH transcription factor with YRPW motif 2 | 3.85   | 4.08E-09   |
| HMOX1               | heme oxygenase 1                                               | 2.063  | 8.58E-43   |
| HOXA7               | homeobox A7                                                    | -2.562 | 0.0000462  |
| HRH2                | histamine receptor H2                                          | 22.904 | 2.61E-11   |
| HTRA1               | HtrA serine peptidase 1                                        | 1.637  | 1.22E-20   |
| ICOSLG/LOC102723996 | inducible T cell costimulator ligand                           | 2.463  | 2.05E-36   |
| ID3                 | inhibitor of DNA binding 3, HLH protein                        | -1.602 | 1.42E-09   |
| IDO1                | indoleamine 2,3-dioxygenase 1                                  | 5.39   | 2.38E-16   |
| IGFBP2              | insulin like growth factor binding protein 2                   | -1.651 | 1.1E-12    |
| IGFBP3              | insulin like growth factor binding protein 3                   | 3.696  | 3.52E-125  |
| IGFBP4              | insulin like growth factor binding protein 4                   | 11.214 | 0          |
| IGFBP5              | insulin like growth factor binding protein 5                   | -2.43  | 1.78E-64   |
| IGFBP6              | insulin like growth factor binding protein 6                   | 1.699  | 3.04E-08   |

|          |                                                             |        |             |
|----------|-------------------------------------------------------------|--------|-------------|
| IL7      | interleukin 7                                               | 2.553  | 5.47E-10    |
| IL11     | interleukin 11                                              | 2.713  | 1.05E-38    |
| IL15     | interleukin 15                                              | 1.911  | 0.00000469  |
| IL24     | interleukin 24                                              | 11.493 | 0.000000015 |
| IL13RA2  | interleukin 13 receptor subunit alpha 2                     | 2.714  | 1.73E-60    |
| IL15RA   | interleukin 15 receptor subunit alpha                       | 2.697  | 4.51E-12    |
| IL27RA   | interleukin 27 receptor subunit alpha                       | 1.964  | 1.95E-15    |
| IL4R     | interleukin 4 receptor                                      | 5.355  | 2.26E-51    |
| ITGA1    | integrin subunit alpha 1                                    | 2.22   | 6.49E-24    |
| ITGA2    | integrin subunit alpha 2                                    | 2.636  | 3.65E-71    |
| ITGA9    | integrin subunit alpha 9                                    | -1.728 | 1.47E-10    |
| ITGB2    | integrin subunit beta 2                                     | 2.405  | 0.00000294  |
| ITGB3    | integrin subunit beta 3                                     | 1.576  | 6.47E-13    |
| ITGB4    | integrin subunit beta 4                                     | 1.548  | 3.65E-10    |
| ITGB8    | integrin subunit beta 8                                     | -1.584 | 1.01E-15    |
| ITGBL1   | integrin subunit beta like 1                                | -2.171 | 1.12E-21    |
| JAG2     | jagged canonical Notch ligand 2                             | 5.436  | 3.04E-17    |
| JUP      | junction plakoglobin                                        | -2.291 | 5.02E-09    |
| KALRN    | kalirin RhoGEF kinase                                       | 1.784  | 3.52E-12    |
| KCNK5    | potassium two pore domain channel subfamily K member 5      | 78.236 | 7.63E-40    |
| KCNMA1   | potassium calcium-activated channel subfamily M alpha 1     | 2.784  | 8.59E-119   |
| KCNN4    | potassium calcium-activated channel subfamily N member 4    | 2.002  | 3.57E-29    |
| KDM5B    | lysine demethylase 5B                                       | 1.675  | 2.3E-22     |
| KIAA0319 | KIAA0319                                                    | 1.699  | 0.0000179   |
| KIRREL3  | kirre like nephrin family adhesion molecule 3               | -1.586 | 0.000000167 |
| KITLG    | KIT ligand                                                  | 2.171  | 2.84E-29    |
| KLF17    | Kruppel like factor 17                                      | 5.808  | 1.86E-18    |
| L1CAM    | L1 cell adhesion molecule                                   | 4.844  | 1.93E-99    |
| LAMA1    | laminin subunit alpha 1                                     | 2.639  | 0.000093    |
| LAMA2    | laminin subunit alpha 2                                     | 2.611  | 1.1E-14     |
| LAMC2    | laminin subunit gamma 2                                     | 2.977  | 2.54E-21    |
| LCP1     | lymphocyte cytosolic protein 1                              | 1.71   | 7.12E-15    |
| LDHA     | lactate dehydrogenase A                                     | 1.667  | 2.89E-13    |
| LGR4     | leucine rich repeat containing G protein-coupled receptor 4 | 3.779  | 8.68E-63    |
| LIPE     | lipase E, hormone sensitive type                            | -2.664 | 4.79E-11    |
| LMCD1    | LIM and cysteine rich domains 1                             | -2.107 | 1.33E-22    |
| LOX      | lysyl oxidase                                               | 9.077  | 1.32E-160   |

|         |                                                                      |         |             |
|---------|----------------------------------------------------------------------|---------|-------------|
| LRP1    | LDL receptor related protein 1                                       | 1.567   | 1.15E-11    |
| LSP1    | lymphocyte specific protein 1                                        | 5.478   | 0.000000169 |
| LTBP2   | latent transforming growth factor beta binding protein 2             | 1.662   | 2.59E-08    |
| MAFB    | MAF bZIP transcription factor B                                      | 2.972   | 0.000243    |
| MAGI2   | membrane associated guanylate kinase, WW and PDZ domain containing 2 | -1.734  | 1.11E-12    |
| MATN2   | matrilin 2                                                           | 3.153   | 6.26E-108   |
| MC1R    | melanocortin 1 receptor                                              | 2.066   | 2.06E-08    |
| MCF2    | MCF.2 cell line derived transforming sequence                        | -5.678  | 0.0000211   |
| MDGA1   | MAM domain containing glycosylphosphatidylinositol anchor 1          | 2.486   | 3.48E-48    |
| MDK     | midkine                                                              | -4.537  | 3.19E-33    |
| MEF2C   | myocyte enhancer factor 2C                                           | -1.722  | 2.54E-10    |
| MELTF   | melanotransferrin                                                    | -1.943  | 1.67E-08    |
| MGLL    | monoglyceride lipase                                                 | 2.107   | 4.07E-53    |
| MGP     | matrix Gla protein                                                   | 2.171   | 3.23E-39    |
| MME     | membrane metalloendopeptidase                                        | 4.053   | 1.72E-72    |
| MMP1    | matrix metallopeptidase 1                                            | 9.258   | 1.88E-08    |
| MMP2    | matrix metallopeptidase 2                                            | 1.663   | 7.65E-23    |
| MMP3    | matrix metallopeptidase 3                                            | 6.528   | 6.1E-21     |
| MMP7    | matrix metallopeptidase 7                                            | 2.754   | 6.64E-38    |
| MMP14   | matrix metallopeptidase 14                                           | 2.842   | 2.19E-100   |
| MSX2    | msh homeobox 2                                                       | 1.804   | 0.000000333 |
| MTSS1   | MTSS I-BAR domain containing 1                                       | 12.624  | 9.27E-67    |
| MTUS1   | microtubule associated scaffold protein 1                            | 6.961   | 0.000000487 |
| MUC1    | mucin 1, cell surface associated                                     | 1.92    | 0.0000115   |
| MYD88   | MYD88 innate immune signal transduction adaptor                      | -1.525  | 3.33E-14    |
| MYRF    | myelin regulatory factor                                             | 1.792   | 1.52E-18    |
| NDRG1   | N-myc downstream regulated 1                                         | 1.766   | 9.39E-22    |
| NEDD4   | NEDD4 E3 ubiquitin protein ligase                                    | -1.565  | 3.45E-19    |
| NEDD9   | neural precursor cell expressed, developmentally down-regulated 9    | -1.63   | 3.14E-19    |
| NEO1    | neogenin 1                                                           | 2.588   | 5.02E-55    |
| NES     | nestin                                                               | -3.165  | 1.02E-132   |
| NEUROG2 | neurogenin 2                                                         | -4.847  | 0.000000577 |
| NISCH   | nischarin                                                            | -1.712  | 4.62E-18    |
| NOG     | noggin                                                               | 5.035   | 0.000000414 |
| NOTCH1  | notch receptor 1                                                     | -1.972  | 0.00000429  |
| NR1D1   | nuclear receptor subfamily 1 group D member 1                        | 1.54    | 2.64E-14    |
| NR1H4   | nuclear receptor subfamily 1 group H member 4                        | -23.037 | 1.32E-49    |

|           |                                                                          |         |             |
|-----------|--------------------------------------------------------------------------|---------|-------------|
| NTN1      | netrin 1                                                                 | 3.519   | 7.4E-35     |
| NTN4      | netrin 4                                                                 | 2.895   | 2.11E-59    |
| NTRK2     | neurotrophic receptor tyrosine kinase 2                                  | 1.889   | 0.000000121 |
| NTRK3     | neurotrophic receptor tyrosine kinase 3                                  | -3.101  | 1.15E-40    |
| NUDT16L1  | nudix hydrolase 16 like 1                                                | -1.655  | 0.00000947  |
| ONECUT1   | one cut homeobox 1                                                       | -4.508  | 0.000161    |
| P4HA2     | prolyl 4-hydroxylase subunit alpha 2                                     | 1.842   | 1.71E-29    |
| PAPPA     | pappalysin 1                                                             | 1.582   | 6.52E-11    |
| PCDH10    | protocadherin 10                                                         | -2.038  | 2.25E-28    |
| PDE2A     | phosphodiesterase 2A                                                     | 4.094   | 4.79E-11    |
| PDGFD     | platelet derived growth factor D                                         | 1.913   | 1.48E-23    |
| PDPN      | podoplanin                                                               | -2.411  | 0.000481    |
| PER1      | period circadian regulator 1                                             | 1.652   | 3.05E-13    |
| PICK1     | protein interacting with PRKCA 1                                         | -2.245  | 2.59E-24    |
| PIK3CG    | phosphatidylinositol-4,5-bisphosphate 3-kinase catalytic subunit gamma   | 6.096   | 7.61E-09    |
| PKN1      | protein kinase N1                                                        | -1.643  | 1.49E-13    |
| PKP2      | plakophilin 2                                                            | -1.845  | 1.47E-20    |
| PLAT      | plasminogen activator, tissue type                                       | -2.06   | 4.11E-39    |
| PLAUR     | plasminogen activator, urokinase receptor                                | 1.826   | 4.73E-29    |
| PLP1      | proteolipid protein 1                                                    | -3.082  | 0.00005     |
| PLXND1    | plexin D1                                                                | -1.575  | 2.03E-13    |
| PODXL2    | podocalyxin like 2                                                       | 2.079   | 7.8E-16     |
| PODXL     | podocalyxin like                                                         | 1.662   | 2.52E-30    |
| POSTN     | periostin                                                                | -31.228 | 4.96E-40    |
| POU3F2    | POU class 3 homeobox 2                                                   | -1.668  | 4.05E-20    |
| PREX1     | phosphatidylinositol-3,4,5-trisphosphate dependent Rac exchange factor 1 | 1.946   | 6.53E-26    |
| PRKCZ     | protein kinase C zeta                                                    | 2.462   | 1.12E-23    |
| PRKD1     | protein kinase D1                                                        | -1.613  | 8.21E-13    |
| PRKG1     | protein kinase cGMP-dependent 1                                          | 6.935   | 1.61E-13    |
| PRLR      | prolactin receptor                                                       | -1.819  | 2.93E-08    |
| PROX1     | prospero homeobox 1                                                      | -2.021  | 5.96E-12    |
| PRTN3     | proteinase 3                                                             | 8.726   | 0.000713    |
| PTN       | pleiotrophin                                                             | -1.615  | 4.31E-16    |
| PTPRU     | protein tyrosine phosphatase receptor type U                             | 4.707   | 5.61E-64    |
| PTPRZ1    | protein tyrosine phosphatase receptor type Z1                            | -2.066  | 3.21E-17    |
| PTX3      | pentraxin 3                                                              | 1.716   | 1.38E-17    |
| RAB11FIP1 | RAB11 family interacting protein 1                                       | 3.243   | 0.000129    |

|          |                                                      |         |             |
|----------|------------------------------------------------------|---------|-------------|
| RAC3     | Rac family small GTPase 3                            | -1.66   | 0.000057    |
| RADIL    | Rap associating with DIL domain                      | 4.819   | 0.0000861   |
| RAPGEF3  | Rap guanine nucleotide exchange factor 3             | 1.897   | 0.000535    |
| RCAN1    | regulator of calcineurin 1                           | 1.76    | 5.64E-27    |
| RGS3     | regulator of G protein signaling 3                   | 1.604   | 1.92E-19    |
| RHOU     | ras homolog family member U                          | 1.91    | 6.94E-20    |
| RIPOR2   | RHO family interacting cell polarization regulator 2 | -4.657  | 1.62E-118   |
| ROR1     | receptor tyrosine kinase like orphan receptor 1      | 2.115   | 6.3E-17     |
| RRAS2    | RAS related 2                                        | 1.552   | 5.77E-11    |
| RUVBL1   | RuvB like AAA ATPase 1                               | -1.766  | 7.89E-21    |
| S100A2   | S100 calcium binding protein A2                      | 3.807   | 4.46E-68    |
| S100A4   | S100 calcium binding protein A4                      | 3.119   | 4.4E-26     |
| S100B    | S100 calcium binding protein B                       | -3.54   | 6.36E-78    |
| SAA1     | serum amyloid A1                                     | 9.709   | 6.01E-11    |
| SCNN1A   | sodium channel epithelial 1 alpha subunit            | 4.96    | 1.39E-27    |
| SCPEP1   | serine carboxypeptidase 1                            | 1.675   | 2.76E-26    |
| SDC1     | syndecan 1                                           | 1.705   | 1.49E-18    |
| SELL     | selectin L                                           | 2.228   | 0.000827    |
| SEMA3B   | semaphorin 3B                                        | -5.284  | 1.92E-45    |
| SEMA3C   | semaphorin 3C                                        | 1.751   | 7.87E-30    |
| SEMA3F   | semaphorin 3F                                        | 15.338  | 2.24E-62    |
| SERPINA1 | serpin family A member 1                             | 2.641   | 2.26E-18    |
| SERPINA5 | serpin family A member 5                             | 3.492   | 2.07E-15    |
| SERPINE1 | serpin family E member 1                             | 1.891   | 7.97E-34    |
| SERPINE2 | serpin family E member 2                             | 1.944   | 2.14E-43    |
| SERPINH1 | serpin family H member 1                             | -2.076  | 7.29E-23    |
| SFRP1    | secreted frizzled related protein 1                  | 1.72    | 1.57E-15    |
| SH3PXD2A | SH3 and PX domains 2A                                | 2.046   | 6.73E-42    |
| SLC8A1   | solute carrier family 8 member A1                    | 4.034   | 3.02E-87    |
| SLIT2    | slit guidance ligand 2                               | -1.801  | 1.23E-38    |
| SLIT3    | slit guidance ligand 3                               | -1.789  | 2.3E-15     |
| SLPI     | secretory leukocyte peptidase inhibitor              | 151.869 | 2.22E-154   |
| SMAD1    | SMAD family member 1                                 | -1.569  | 0.000000554 |
| SOCS2    | suppressor of cytokine signaling 2                   | -2.038  | 1.84E-31    |
| SORBS3   | sorbin and SH3 domain containing 3                   | -1.589  | 2.27E-16    |
| SOX2     | SRY-box transcription factor 2                       | -1.684  | 2.25E-16    |
| SPINT1   | serine peptidase inhibitor, Kunitz type 1            | -1.966  | 0.000272    |



|           |                                                                        |         |             |
|-----------|------------------------------------------------------------------------|---------|-------------|
| SPP1      | secreted phosphoprotein 1                                              | -2.283  | 4.95E-61    |
| SPSB1     | splA/ryanodine receptor domain and SOCS box containing 1               | 3.28    | 1.33E-51    |
| SRSF1     | serine and arginine rich splicing factor 1                             | 1.82    | 6.91E-08    |
| ST8SIA4   | ST8 alpha-N-acetyl-neuraminide alpha-2,8-sialyltransferase 4           | 2.396   | 0.000125    |
| STC1      | stanniocalcin 1                                                        | 1.966   | 1.43E-40    |
| STMN3     | stathmin 3                                                             | 2.641   | 1.76E-25    |
| SULF1     | sulfatase 1                                                            | -6.024  | 7.78E-106   |
| TACR1     | tachykinin receptor 1                                                  | 1.902   | 4.9E-14     |
| TFAP2C    | transcription factor AP-2 gamma                                        | -1.655  | 7.95E-28    |
| TFPI      | tissue factor pathway inhibitor                                        | 1.613   | 3.24E-13    |
| TGFB2     | transforming growth factor beta 2                                      | 1.642   | 2.78E-14    |
| TGFB3     | transforming growth factor beta 3                                      | 2.487   | 3E-27       |
| TGFBR3    | transforming growth factor beta receptor 3                             | 2.115   | 0.00228     |
| TGM2      | transglutaminase 2                                                     | -1.531  | 9.53E-13    |
| TIAM1     | T cell lymphoma invasion and metastasis 1                              | 1.752   | 3.87E-16    |
| TIMP3     | TIMP metalloproteinase inhibitor 3                                     | 1.564   | 1.79E-11    |
| TLR3      | toll like receptor 3                                                   | 2.388   | 0.000318    |
| TLR4      | toll like receptor 4                                                   | -1.777  | 9.19E-29    |
| TMEFF2    | transmembrane protein with EGF like and two follistatin like domains 2 | 1.873   | 8.99E-08    |
| TNC       | tenascin C                                                             | 1.697   | 6.6E-25     |
| TNFAIP3   | TNF alpha induced protein 3                                            | 1.55    | 5.86E-10    |
| TNFAIP6   | TNF alpha induced protein 6                                            | 3.289   | 0.000000937 |
| TNFRSF21  | TNF receptor superfamily member 21                                     | 3.604   | 2.06E-118   |
| TNFRSF11B | TNF receptor superfamily member 11b                                    | 222.216 | 5.42E-18    |
| TNFSF4    | TNF superfamily member 4                                               | -11.65  | 3.61E-140   |
| TNFSF10   | TNF superfamily member 10                                              | 3.24    | 2.4E-41     |
| TUBB2B    | tubulin beta 2B class IIb                                              | -2.6    | 4.38E-27    |
| TXK       | TXK tyrosine kinase                                                    | -3.695  | 6.4E-16     |
| UCP2      | uncoupling protein 2                                                   | 1.622   | 2.21E-11    |
| UNC5B     | unc-5 netrin receptor B                                                | 2.1     | 0.000144    |
| VCAM1     | vascular cell adhesion molecule 1                                      | -2.68   | 9.51E-08    |
| VCAN      | versican                                                               | -1.625  | 1.96E-19    |
| VDR       | vitamin D receptor                                                     | 2.198   | 1.79E-21    |
| VEGFA     | vascular endothelial growth factor A                                   | 2.153   | 9.84E-61    |
| VEGFC     | vascular endothelial growth factor C                                   | 1.619   | 1.88E-17    |
| VSNL1     | visinin like 1                                                         | -1.793  | 3.62E-12    |
| WNT5B     | Wnt family member 5B                                                   | 2.005   | 8.21E-23    |

|      |                                      |       |          |
|------|--------------------------------------|-------|----------|
| XDH  | xanthine dehydrogenase               | 4.296 | 3.26E-65 |
| ZEB1 | zinc finger E-box binding homeobox 1 | 1.534 | 1.12E-14 |
