# Supplementary material for: mTORC2/Rac1 Pathway Predisposes Cancer Aggressiveness in IDH1-Mutated Glioma
Source: MDPI journal article supplement (doi:10.3390/cancers12040787), 2020-03-26
Supplement: s1 [file s1]

Supplementary Table 1. List of differentially expressed genes in U251 IDH1 R132C compared with U251 IDH1 WT

| Gene Symbol | Entrez Gene Name                                           | Fold Change | FDR         |
|-------------|------------------------------------------------------------|-------------|-------------|
| A2M         | alpha-2-macroglobulin                                      | 1.621       | 3.04E-19    |
| ABCA1       | ATP binding cassette subfamily A member 1                  | 1.726       | 3.22E-27    |
| ABCA4       | ATP binding cassette subfamily A member 4                  | 3.462       | 0.000074    |
| ABCB11      | ATP binding cassette subfamily B member 11                 | -4.134      | 0.000181    |
| ABHD8       | abhydrolase domain containing 8                            | -1.612      | 0.0000783   |
| ABI3BP      | ABI family member 3 binding protein                        | -2.057      | 1.87E-43    |
| AC0030921   |                                                            | 20.264      | 1.2E-17     |
| AC0051501   |                                                            | -37.495     | 1.53E-64    |
| AC0091206   |                                                            | 3.231       | 0.0000404   |
| AC092675.1  |                                                            | 2.126       | 0.00122     |
| AC0937871   |                                                            | -2.012      | 0.00000462  |
| ACKR3       | atypical chemokine receptor 3                              | 6.536       | 5.38E-09    |
| ACP6        | acid phosphatase 6, lysophosphatidic                       | -1.788      | 1.27E-15    |
| ACSL5       | acyl-CoA synthetase long chain family member 5             | 4.655       | 1.02E-17    |
| ACSS3       | acyl-CoA synthetase short chain family member 3            | -1.608      | 0.0000237   |
| ACTA2       | actin alpha 2, smooth muscle                               | 1.674       | 7.62E-10    |
| ACTG1       | actin gamma 1                                              | -1.573      | 1.34E-10    |
| ACTG2       | actin gamma 2, smooth muscle                               | -7.099      | 5.8E-12     |
| ADAMTS12    | ADAM metalloproteinase with thrombospondin type 1 motif 12 | 2.154       | 2.45E-21    |
| ADAMTS14    | ADAM metalloproteinase with thrombospondin type 1 motif 14 | 4.551       | 0.000000828 |
| ADAMTS2     | ADAM metalloproteinase with thrombospondin type 1 motif 2  | 21.161      | 1.09E-18    |
| ADGRL2      | adhesion G protein-coupled receptor L2                     | 3.343       | 0.000104    |
| ADORA2B     | adenosine A2b receptor                                     | 1.569       | 4.84E-19    |
| ADRA1B      | adrenoceptor alpha 1B                                      | -1.635      | 4.3E-09     |
| ADRA1D      | adrenoceptor alpha 1D                                      | -3.074      | 6.95E-27    |
| ADRB2       | adrenoceptor beta 2                                        | 2.406       | 0.0000882   |
| AFAP1L2     | actin filament associated protein 1 like 2                 | 3.997       | 2.52E-23    |
| AFF2        | AF4/FMR2 family member 2                                   | -2.446      | 0.000444    |
| AGMAT       | agmatinase                                                 | -11.047     | 0.0000023   |
| AGT         | angiotensinogen                                            | 1.879       | 0.00902     |
| AGTRAP      | angiotensin II receptor associated protein                 | 2.086       | 7.32E-20    |
| AHNAK       | AHNAK nucleoprotein                                        | 1.722       | 6.65E-19    |
| AHNAK2      | AHNAK nucleoprotein 2                                      | 1.919       | 3.61E-26    |
| AJAP1       | adherens junctions associated protein 1                    | -3.059      | 3.31E-09    |
| AJUBA       | ajuba LIM protein                                          | -1.552      | 1.95E-12    |

|               |                                                             |        |             |
|---------------|-------------------------------------------------------------|--------|-------------|
| AK4           | adenylate kinase 4                                          | -1.777 | 6.69E-16    |
| AK5           | adenylate kinase 5                                          | -3.429 | 3.38E-44    |
| AKAP6         | A-kinase anchoring protein 6                                | -2.435 | 1.63E-39    |
| AKR1C1/AKR1C2 | aldo-keto reductase family 1 member C2                      | 2.292  | 2.82E-14    |
| AKR1C3        | aldo-keto reductase family 1 member C3                      | 1.804  | 6.08E-10    |
| ALDH1A3       | aldehyde dehydrogenase 1 family member A3                   | -1.817 | 1.01E-41    |
| ALK           | ALK receptor tyrosine kinase                                | -3.854 | 2.99E-16    |
| ALKBH7        | alkB homolog 7                                              | -1.792 | 0.0000143   |
| ALX4          | ALX homeobox 4                                              | 7.554  | 1.11E-19    |
| AMH           | anti-Mullerian hormone                                      | -2.013 | 0.000222    |
| AMOT          | angiomotin                                                  | -1.603 | 1.86E-15    |
| AMOTL2        | angiomotin like 2                                           | -2.205 | 5.37E-42    |
| ANGPTL4       | angiopoietin like 4                                         | 7.751  | 2.5E-24     |
| ANK1          | ankyrin 1                                                   | -4.559 | 1.11E-39    |
| ANKRD1        | ankyrin repeat domain 1                                     | -2.487 | 1.34E-30    |
| ANKS1B        | ankyrin repeat and sterile alpha motif domain containing 1B | -4.897 | 2.4E-23     |
| ANO1          | anoctamin 1                                                 | -2.805 | 0.000262    |
| ANTXR2        | ANTXR cell adhesion molecule 2                              | 1.541  | 3.04E-14    |
| ANXA6         | annexin A6                                                  | -1.626 | 4.79E-12    |
| AOX1          | aldehyde oxidase 1                                          | 2.013  | 3.8E-13     |
| AP3B2         | adaptor related protein complex 3 subunit beta 2            | 2.06   | 0.0000113   |
| APCDD1        | APC down-regulated 1                                        | -1.647 | 0.00000618  |
| APCDD1L       | APC down-regulated 1 like                                   | 2.379  | 3.65E-54    |
| APLN          | apelin                                                      | -1.833 | 0.00000355  |
| APOL1         | apolipoprotein L1                                           | 2.137  | 3.67E-23    |
| APOL6         | apolipoprotein L6                                           | 1.974  | 9.21E-27    |
| ARG2          | arginase 2                                                  | 2.331  | 7.75E-10    |
| ARHGAP24      | Rho GTPase activating protein 24                            | 13.636 | 1.6E-19     |
| ARHGAP25      | Rho GTPase activating protein 25                            | 2.342  | 0.000000891 |
| ARHGAP33      | Rho GTPase activating protein 33                            | -1.702 | 2.58E-12    |
| ARHGAP36      | Rho GTPase activating protein 36                            | -5.307 | 3.92E-09    |
| ARHGAP42      | Rho GTPase activating protein 42                            | 1.623  | 0.000000462 |
| ARHGAP45      | Rho GTPase activating protein 45                            | -5.517 | 1.58E-13    |
| ARHGDIA       | Rho GDP dissociation inhibitor alpha                        | -1.633 | 0.000000307 |
| ARMH4         | armadillo like helical domain containing 4                  | 1.808  | 0.000000212 |
| ARNT2         | aryl hydrocarbon receptor nuclear translocator 2            | -1.976 | 5.65E-34    |
| ARRB1         | arrestin beta 1                                             | 1.832  | 0.0000138   |

|            |                                                             |         |             |
|------------|-------------------------------------------------------------|---------|-------------|
| ARRDC4     | arrestin domain containing 4                                | -1.531  | 8.8E-15     |
| ARSL       | arylsulfatase L                                             | -1.741  | 0.00149     |
| ASIC1      | acid sensing ion channel subunit 1                          | 1.862   | 3.01E-09    |
| ASIC3      | acid sensing ion channel subunit 3                          | 2.078   | 0.000000181 |
| ATAD3A     | ATPase family AAA domain containing 3A                      | -1.758  | 0.0000012   |
| ATOH8      | atonal bHLH transcription factor 8                          | -2.78   | 0.000000518 |
| ATP10A     | ATPase phospholipid transporting 10A (putative)             | 2.415   | 3.23E-11    |
| ATP11A     | ATPase phospholipid transporting 11A                        | 2.009   | 1.41E-30    |
| ATP2A1-AS1 | ATP2A1 antisense RNA 1                                      | -1.889  | 0.00135     |
| ATP2B1     | ATPase plasma membrane Ca <sup>2+</sup> transporting 1      | 1.709   | 1.65E-22    |
| ATP6AP1L   | ATPase H <sup>+</sup> transporting accessory protein 1 like | 1.775   | 0.000496    |
| ATP6V1C2   | ATPase H <sup>+</sup> transporting V1 subunit C2            | -2.044  | 0.00000826  |
| AZGP1      | alpha-2-glycoprotein 1, zinc-binding                        | -6.456  | 9.34E-114   |
| B3GALT5    | beta-1,3-galactosyltransferase 5                            | 3.82    | 7.14E-12    |
| B4GALNT3   | beta-1,4-N-acetyl-galactosaminyltransferase 3               | -2.084  | 2.19E-25    |
| BACE2      | beta-secretase 2                                            | 1.634   | 1.31E-24    |
| BASP1      | brain abundant membrane attached signal protein 1           | 16.922  | 1.01E-84    |
| BBOX1-AS1  | BBOX1 antisense RNA 1                                       | 3.404   | 0.000141    |
| BCAR3      | BCAR3 adaptor protein, NSP family member                    | 1.588   | 1.94E-18    |
| BCHE       | butyrylcholinesterase                                       | 2.107   | 0.00165     |
| BCL2L11    | BCL2 like 11                                                | 2.028   | 1.8E-24     |
| BEND4      | BEN domain containing 4                                     | 2.963   | 0.0000687   |
| BEX1       | brain expressed X-linked 1                                  | -3.179  | 0.0021      |
| BHLHE40    | basic helix-loop-helix family member e40                    | 1.776   | 1.65E-29    |
| BHLHE41    | basic helix-loop-helix family member e41                    | 2.669   | 1.57E-51    |
| BIRC3      | baculoviral IAP repeat containing 3                         | 1.93    | 7.93E-23    |
| BMF        | Bcl2 modifying factor                                       | 2.176   | 0.00111     |
| BMP4       | bone morphogenetic protein 4                                | 6.467   | 0.00000848  |
| BOC        | BOC cell adhesion associated, oncogene regulated            | 1.806   | 4.05E-19    |
| BRINP1     | BMP/retinoic acid inducible neural specific 1               | 50.914  | 1.43E-54    |
| BTBD11     | BTB domain containing 11                                    | 9.274   | 3.47E-17    |
| BTBD19     | BTB domain containing 19                                    | 1.765   | 1.52E-09    |
| BTF3L4P4   | basic transcription factor 3 like 4 pseudogene 4            | 156.937 | 2.81E-11    |
| BTN3A1     | butyrophilin subfamily 3 member A1                          | 1.917   | 1.49E-14    |
| BTN3A3     | butyrophilin subfamily 3 member A3                          | 1.88    | 5.72E-10    |
| BTNL8      | butyrophilin like 8                                         | 3.931   | 0.000149    |
| C10orf90   | chromosome 10 open reading frame 90                         | 2.224   | 2.74E-10    |

|          |                                                               |         |             |
|----------|---------------------------------------------------------------|---------|-------------|
| C11orf45 | chromosome 11 open reading frame 45                           | 1.78    | 0.0000054   |
| C11orf74 | chromosome 11 open reading frame 74                           | 1.698   | 0.000000019 |
| C11orf87 | chromosome 11 open reading frame 87                           | -14.963 | 2.97E-08    |
| C16orf74 | chromosome 16 open reading frame 74                           | 1.771   | 0.00000196  |
| C1R      | complement C1r                                                | 2.525   | 2.29E-20    |
| C1RL     | complement C1r subcomponent like                              | 2.17    | 1.01E-11    |
| C1S      | complement C1s                                                | 4.611   | 2.35E-43    |
| C2CD2    | C2 calcium dependent domain containing 2                      | 1.605   | 9.15E-16    |
| C3       | complement C3                                                 | 7.404   | 7.74E-28    |
| C3AR1    | complement C3a receptor 1                                     | 2.566   | 0.000764    |
| C3orf70  | chromosome 3 open reading frame 70                            | 2.651   | 0.00123     |
| C4orf19  | chromosome 4 open reading frame 19                            | 2.394   | 1.07E-21    |
| C5orf46  | chromosome 5 open reading frame 46                            | -4.638  | 9.4E-102    |
| C8orf82  | chromosome 8 open reading frame 82                            | -1.663  | 0.0000541   |
| CA11     | carbonic anhydrase 11                                         | 1.903   | 0.000000957 |
| CA8      | carbonic anhydrase 8                                          | 4.731   | 0.0000324   |
| CA9      | carbonic anhydrase 9                                          | -2.025  | 4.18E-24    |
| CACNA2D3 | calcium voltage-gated channel auxiliary subunit alpha2delta 3 | 2.432   | 0.0000136   |
| CACNG4   | calcium voltage-gated channel auxiliary subunit gamma 4       | 1.879   | 2.96E-13    |
| CAMK2N1  | calcium/calmodulin dependent protein kinase II inhibitor 1    | 2.109   | 8.27E-19    |
| CAND2    | cullin associated and neddylation dissociated 2 (putative)    | -8.848  | 1.25E-16    |
| CAPS     | calcyphosine                                                  | -2.156  | 2.12E-09    |
| CARD10   | caspase recruitment domain family member 10                   | -1.741  | 9.84E-08    |
| CARD6    | caspase recruitment domain family member 6                    | 1.681   | 3.58E-10    |
| CASP1    | caspase 1                                                     | 1.876   | 0.00000248  |
| CASP4    | caspase 4                                                     | 1.593   | 4.23E-15    |
| CAVIN3   | caveolae associated protein 3                                 | -12.059 | 0.00000995  |
| CCDC102B | coiled-coil domain containing 102B                            | -1.831  | 0.000154    |
| CCDC106  | coiled-coil domain containing 106                             | -2.204  | 2.96E-12    |
| CCDC144A | coiled-coil domain containing 144A                            | -2.307  | 0.00000217  |
| CCDC148  | coiled-coil domain containing 148                             | -3.249  | 0.000638    |
| CCDC184  | coiled-coil domain containing 184                             | -2.891  | 1.24E-12    |
| CCDC189  | coiled-coil domain containing 189                             | -1.625  | 0.00000126  |
| CCDC61   | coiled-coil domain containing 61                              | -1.588  | 0.00000185  |
| CCDC80   | coiled-coil domain containing 80                              | 2.013   | 4.83E-50    |
| CCN2     | cellular communication network factor 2                       | -1.86   | 6.31E-54    |
| CD180    | CD180 molecule                                                | 4.372   | 8.6E-76     |

|        |                                                  |        |             |
|--------|--------------------------------------------------|--------|-------------|
| CD200  | CD200 molecule                                   | -2.28  | 3.28E-11    |
| CD274  | CD274 molecule                                   | -1.688 | 3.29E-17    |
| CD300C | CD300c molecule                                  | 30.473 | 0.000000253 |
| CD33   | CD33 molecule                                    | 30.807 | 1.93E-174   |
| CD55   | CD55 molecule (Cromer blood group)               | 3.675  | 1.84E-13    |
| CD82   | CD82 molecule                                    | 2.865  | 2.64E-76    |
| CD93   | CD93 molecule                                    | 3.717  | 0.000000976 |
| CDH6   | cadherin 6                                       | -5.532 | 1.28E-81    |
| CDKN1A | cyclin dependent kinase inhibitor 1A             | 1.706  | 1.94E-17    |
| CDON   | cell adhesion associated, oncogene regulated     | 1.975  | 1.99E-38    |
| CDT1   | chromatin licensing and DNA replication factor 1 | -2.267 | 3.47E-10    |
| CDYL2  | chromodomain Y like 2                            | 3.583  | 2.68E-23    |
| CECR2  | CECR2 histone acetyl-lysine reader               | 17.05  | 2.44E-10    |
| CELSR2 | cadherin EGF LAG seven-pass G-type receptor 2    | -1.586 | 1.36E-13    |
| CEMIP  | cell migration inducing hyaluronidase 1          | 2.334  | 1.54E-20    |
| CEP131 | centrosomal protein 131                          | -1.838 | 0.00000374  |
| CERS4  | ceramide synthase 4                              | -1.63  | 0.0000506   |
| CES1P1 | carboxylesterase 1 pseudogene 1                  | 39.234 | 8.34E-13    |
| CES1P2 | carboxylesterase 1 pseudogene 2                  | 78.379 | 2.58E-24    |
| CFAP45 | cilia and flagella associated protein 45         | 1.733  | 0.000537    |
| CFAP69 | cilia and flagella associated protein 69         | 2.118  | 0.00232     |
| CFI    | complement factor I                              | 1.574  | 9.7E-17     |
| CGA    | glycoprotein hormones, alpha polypeptide         | -3.603 | 8.64E-08    |
| CGNL1  | cingulin like 1                                  | -1.677 | 2.31E-26    |
| CHAF1A | chromatin assembly factor 1 subunit A            | -1.542 | 4.83E-16    |
| CHFR   | checkpoint with forkhead and ring finger domains | -4.147 | 4.13E-36    |
| CHI3L1 | chitinase 3 like 1                               | 38.204 | 7.44E-269   |
| CHI3L2 | chitinase 3 like 2                               | 5.415  | 2.48E-35    |
| CHRD   | chordin                                          | -2.433 | 0.00115     |
| CHST11 | carbohydrate sulfotransferase 11                 | 2.177  | 4.32E-34    |
| CHST15 | carbohydrate sulfotransferase 15                 | 11.452 | 2.92E-107   |
| CHSY3  | chondroitin sulfate synthase 3                   | -3.845 | 8.13E-13    |
| CIART  | circadian associated repressor of transcription  | 2.351  | 3.75E-17    |
| CIB2   | calcium and integrin binding family member 2     | -1.641 | 0.000271    |
| CKB    | creatine kinase B                                | -3.036 | 3.53E-23    |
| CLCA2  | chloride channel accessory 2                     | 3.86   | 0.0000115   |
| CLCN4  | chloride voltage-gated channel 4                 | -1.667 | 1.11E-08    |

|              |                                                          |         |             |
|--------------|----------------------------------------------------------|---------|-------------|
| CLDN1        | claudin 1                                                | 2.003   | 6.6E-11     |
| CLDN12       | claudin 12                                               | 1.691   | 1.84E-19    |
| CLU          | clusterin                                                | 2.442   | 1.98E-35    |
| CMTM8        | CKLF like MARVEL transmembrane domain containing 8       | -1.817  | 2.23E-11    |
| CNIH2        | cornichon family AMPA receptor auxiliary protein 2       | -4.115  | 7.32E-08    |
| CNR1         | cannabinoid receptor 1                                   | -2.776  | 3.45E-65    |
| CNTNAP2      | contactin associated protein like 2                      | 6.052   | 3.32E-31    |
| COBL         | cordon-bleu WH2 repeat protein                           | 8.708   | 1.22E-09    |
| COL11A1      | collagen type XI alpha 1 chain                           | -1.807  | 5.44E-32    |
| COL17A1      | collagen type XVII alpha 1 chain                         | 3.841   | 3.96E-94    |
| COL4A4       | collagen type IV alpha 4 chain                           | 4.124   | 0.000148    |
| COL8A1       | collagen type VIII alpha 1 chain                         | -1.549  | 8.85E-09    |
| COL9A2       | collagen type IX alpha 2 chain                           | -2.299  | 1.63E-11    |
| COL9A3       | collagen type IX alpha 3 chain                           | -10.911 | 1.47E-32    |
| COLEC12      | collectin subfamily member 12                            | 4.862   | 0.00000105  |
| CORO1A       | coronin 1A                                               | -1.667  | 0.000215    |
| CORO1B       | coronin 1B                                               | -1.567  | 0.00000026  |
| CORO2B       | coronin 2B                                               | -1.809  | 5.52E-15    |
| CP           | ceruloplasmin                                            | 2.971   | 3.75E-86    |
| CPA6         | carboxypeptidase A6                                      | -1.663  | 2.23E-10    |
| CPEB1        | cytoplasmic polyadenylation element binding protein 1    | 2.063   | 1.19E-08    |
| CPM          | carboxypeptidase M                                       | -8.602  | 6.04E-10    |
| CPT1C        | carnitine palmitoyltransferase 1C                        | -2.111  | 1.53E-15    |
| CRACD        | capping protein inhibiting regulator of actin dynamics   | -3.27   | 1.67E-24    |
| CRISPLD1     | cysteine rich secretory protein LCCL domain containing 1 | 1.768   | 2.79E-08    |
| CRLF1        | cytokine receptor like factor 1                          | 3.959   | 6.43E-08    |
| CRYAB        | crystallin alpha B                                       | -5.072  | 3.67E-121   |
| CSAG1        | chondrosarcoma associated gene 1                         | 2.614   | 0.00125     |
| CSF1         | colony stimulating factor 1                              | 1.716   | 1.92E-22    |
| CSF2         | colony stimulating factor 2                              | 2.847   | 0.000000504 |
| CTA_384D836  |                                                          | -2.014  | 0.000000307 |
| CTBS         | chitobiase                                               | 1.699   | 2.27E-12    |
| CTD_2017D111 |                                                          | 2.075   | 4.38E-08    |
| CTD_2286N82  |                                                          | 3.611   | 0.0000443   |
| CTNNA2       | catenin alpha 2                                          | -3.667  | 2.02E-42    |
| CTNND2       | catenin delta 2                                          | -1.703  | 1.61E-10    |
| CTSH         | cathepsin H                                              | 1.854   | 3.22E-24    |

|         |                                                |        |             |
|---------|------------------------------------------------|--------|-------------|
| CTSS    | cathepsin S                                    | 3.604  | 5.28E-34    |
| CTSV    | cathepsin V                                    | 1.922  | 1.15E-11    |
| CTSZ    | cathepsin Z                                    | -1.888 | 1.34E-17    |
| CTU2    | cytosolic thiouridylase subunit 2              | -1.646 | 0.0000385   |
| CXADR   | CXADR Ig-like cell adhesion molecule           | 2.294  | 1.04E-29    |
| CXCL12  | C-X-C motif chemokine ligand 12                | 5.381  | 1.91E-28    |
| CYB5R2  | cytochrome b5 reductase 2                      | -1.939 | 1.26E-13    |
| CYBRD1  | cytochrome b reductase 1                       | 1.818  | 1.69E-34    |
| CYP27C1 | cytochrome P450 family 27 subfamily C member 1 | 2.191  | 5.88E-10    |
| CYP46A1 | cytochrome P450 family 46 subfamily A member 1 | -2.366 | 1.16E-09    |
| CYP51A1 | cytochrome P450 family 51 subfamily A member 1 | -2.098 | 0.0000614   |
| CYTL1   | cytokine like 1                                | -4.171 | 2.55E-08    |
| DAB1    | DAB adaptor protein 1                          | -4.372 | 5.76E-09    |
| DAGLA   | diacylglycerol lipase alpha                    | -1.594 | 0.0000149   |
| DBP     | D-box binding PAR bZIP transcription factor    | 1.698  | 0.0000081   |
| DCAF15  | DDB1 and CUL4 associated factor 15             | -1.544 | 0.000000207 |
| DCLK1   | doublecortin like kinase 1                     | 1.64   | 4.03E-11    |
| DENND2C | DENN domain containing 2C                      | 1.678  | 1.55E-08    |
| DENND2D | DENN domain containing 2D                      | -4.852 | 0.0000486   |
| DGAT2   | diacylglycerol O-acyltransferase 2             | 1.798  | 9.1E-10     |
| DGCR5   | DiGeorge syndrome critical region gene 5       | 1.899  | 0.000824    |
| DGKG    | diacylglycerol kinase gamma                    | 1.576  | 2.96E-12    |
| DGKI    | diacylglycerol kinase iota                     | 1.675  | 5.26E-10    |
| DHRS2   | dehydrogenase/reductase 2                      | 2.012  | 0.0000175   |
| DHRS9   | dehydrogenase/reductase 9                      | -4.714 | 1.85E-13    |
| DIO2    | iodothyronine deiodinase 2                     | -4.564 | 6.28E-67    |
| DIPK1A  | divergent protein kinase domain 1A             | 1.659  | 5.8E-13     |
| DIPK2A  | divergent protein kinase domain 2A             | 1.601  | 6.6E-09     |
| DIRAS1  | DIRAS family GTPase 1                          | -5.067 | 2.22E-21    |
| DIRAS3  | DIRAS family GTPase 3                          | -1.552 | 4.68E-12    |
| DISP1   | dispatched RND transporter family member 1     | 1.752  | 0.000000564 |
| DLC1    | DLC1 Rho GTPase activating protein             | 2.1    | 1.49E-21    |
| DLL1    | delta like canonical Notch ligand 1            | 2.146  | 0.0000406   |
| DMBX1   | diencephalon/mesencephalon homeobox 1          | 3.239  | 3.88E-25    |
| DMKN    | dermokine                                      | 6.658  | 0.000121    |
| DNER    | delta/notch like EGF repeat containing         | 1.667  | 7.58E-26    |
| DNM1    | dynamamin 1                                    | 1.656  | 1.05E-20    |

|          |                                                                                |        |             |
|----------|--------------------------------------------------------------------------------|--------|-------------|
| DNM3     | dynamamin 3                                                                    | -1.738 | 6.95E-12    |
| DOCK3    | dedicator of cytokinesis 3                                                     | 2.056  | 3.13E-13    |
| DOCK4    | dedicator of cytokinesis 4                                                     | 1.542  | 4.09E-11    |
| DOK5     | docking protein 5                                                              | -5.466 | 4.15E-35    |
| DOT1L    | DOT1 like histone lysine methyltransferase                                     | -1.874 | 0.000000031 |
| DPM3     | dolichyl-phosphate mannosyltransferase subunit 3, regulatory                   | -1.819 | 0.00000034  |
| DPP7     | dipeptidyl peptidase 7                                                         | -1.772 | 0.00000255  |
| DPYSL5   | dihydropyrimidinase like 5                                                     | 6.085  | 6.83E-100   |
| DRD2     | dopamine receptor D2                                                           | 1.654  | 1.15E-19    |
| DSE      | dermatan sulfate epimerase                                                     | 2.116  | 7.93E-23    |
| DSG2     | desmoglein 2                                                                   | 1.607  | 1.13E-21    |
| DSP      | desmoplakin                                                                    | 4.847  | 6.38E-13    |
| DTX3     | deltex E3 ubiquitin ligase 3                                                   | -1.667 | 7.11E-10    |
| DUS1L    | dihydrouridine synthase 1 like                                                 | -1.591 | 1.06E-09    |
| DUSP10   | dual specificity phosphatase 10                                                | 1.874  | 9.27E-18    |
| DUSP5    | dual specificity phosphatase 5                                                 | 1.85   | 9.58E-18    |
| DUXAP10  | double homeobox A pseudogene 10                                                | 3.135  | 0.00000191  |
| DUXAP8   | double homeobox A pseudogene 8                                                 | 5.412  | 7.23E-09    |
| EDIL3    | EGF like repeats and discoidin domains 3                                       | 2.756  | 3.5E-50     |
| EDN1     | endothelin 1                                                                   | -2.74  | 4.29E-57    |
| EDNRB    | endothelin receptor type B                                                     | -1.729 | 1.44E-11    |
| EEFSEC   | eukaryotic elongation factor, selenocysteine-tRNA specific                     | -1.879 | 4.89E-12    |
| EFEMP2   | EGF containing fibulin extracellular matrix protein 2                          | -3.92  | 2.82E-25    |
| EFNA1    | ephrin A1                                                                      | 2.559  | 2.33E-10    |
| EHD3     | EH domain containing 3                                                         | 1.798  | 8.23E-14    |
| ELFN2    | extracellular leucine rich repeat and fibronectin type III domain containing 2 | 1.925  | 1.03E-20    |
| ELOVL2   | ELOVL fatty acid elongase 2                                                    | -1.929 | 0.0000567   |
| EML2     | EMAP like 2                                                                    | -2.007 | 0.000917    |
| EN1      | engrailed homeobox 1                                                           | -1.639 | 0.000000336 |
| ENG      | endoglin                                                                       | -2.715 | 6.67E-15    |
| ENPP5    | ectonucleotide pyrophosphatase/phosphodiesterase family member 5               | 2.398  | 0.000000219 |
| EPAS1    | endothelial PAS domain protein 1                                               | 2.101  | 1.89E-46    |
| EPB41L4A | erythrocyte membrane protein band 4.1 like 4A                                  | 2.224  | 1E-19       |
| EPB41L4B | erythrocyte membrane protein band 4.1 like 4B                                  | 1.948  | 3.54E-13    |
| EPHA3    | EPH receptor A3                                                                | -1.676 | 1.3E-25     |
| EPHA4    | EPH receptor A4                                                                | -1.628 | 0.00000532  |
| EPHA5    | EPH receptor A5                                                                | 2.213  | 3.34E-17    |



|            |                                                             |         |             |
|------------|-------------------------------------------------------------|---------|-------------|
| EPHB2      | EPH receptor B2                                             | 2.581   | 1.21E-75    |
| EPHX1      | epoxide hydrolase 1                                         | 1.535   | 1.33E-12    |
| EPHX4      | epoxide hydrolase 4                                         | 1.776   | 0.000000622 |
| EPST11     | epithelial stromal interaction 1                            | -1.777  | 0.00000613  |
| ERAP1      | endoplasmic reticulum aminopeptidase 1                      | 1.734   | 4.9E-26     |
| ERAP2      | endoplasmic reticulum aminopeptidase 2                      | 2.334   | 3.94E-61    |
| ERCC2      | ERCC excision repair 2, TFIIH core complex helicase subunit | -1.904  | 3.56E-26    |
| ERICH3     | glutamate rich 3                                            | -3.431  | 0.000185    |
| ERMP1      | endoplasmic reticulum metalloproteinase 1                   | 2.103   | 3.45E-29    |
| ERO1B      | endoplasmic reticulum oxidoreductase 1 beta                 | 1.569   | 0.00000117  |
| ERP29      | endoplasmic reticulum protein 29                            | 1.551   | 6.57E-18    |
| EVI2A      | ecotropic viral integration site 2A                         | 2.237   | 2.79E-13    |
| EXOSC4     | exosome component 4                                         | -1.592  | 0.0000667   |
| EXTL1      | exostosin like glycosyltransferase 1                        | -44.802 | 3.23E-21    |
| F11R       | F11 receptor                                                | -1.762  | 2.76E-09    |
| F2RL2      | coagulation factor II thrombin receptor like 2              | 1.766   | 1.08E-10    |
| F3         | coagulation factor III, tissue factor                       | -2.008  | 1.17E-33    |
| FABP7      | fatty acid binding protein 7                                | -1.819  | 6.11E-27    |
| FAM131A    | family with sequence similarity 131 member A                | -1.839  | 4.63E-12    |
| FAM131B    | family with sequence similarity 131 member B                | 2.488   | 2.38E-08    |
| FAM160A1   | family with sequence similarity 160 member A1               | 1.642   | 0.00000253  |
| FAM171B    | family with sequence similarity 171 member B                | 1.742   | 2.8E-11     |
| FAM189A1   | family with sequence similarity 189 member A1               | 5.16    | 4.98E-20    |
| FAM222A    | family with sequence similarity 222 member A                | -1.738  | 0.00172     |
| FAM227A    | family with sequence similarity 227 member A                | 3.28    | 0.000336    |
| FAM229B    | family with sequence similarity 229 member B                | 1.688   | 0.0000756   |
| FAM43A     | family with sequence similarity 43 member A                 | -1.861  | 0.00000184  |
| FAM89A     | family with sequence similarity 89 member A                 | 2.598   | 1.92E-11    |
| FAP        | fibroblast activation protein alpha                         | 3.686   | 2.29E-34    |
| FAS        | Fas cell surface death receptor                             | 1.641   | 4.42E-13    |
| FAT2       | FAT atypical cadherin 2                                     | 42.889  | 1.61E-40    |
| FAT3       | FAT atypical cadherin 3                                     | -1.612  | 3.57E-12    |
| FBLN1      | fibulin 1                                                   | 1.563   | 4.08E-11    |
| FBLN5      | fibulin 5                                                   | 6.677   | 0.0000003   |
| FBXL19-AS1 | FBXL19 antisense RNA 1                                      | 1.764   | 0.000328    |
| FBXO4      | F-box protein 4                                             | -1.716  | 6.11E-10    |
| FCGRT      | Fc fragment of IgG receptor and transporter                 | -2.014  | 1.45E-09    |

|           |                                                         |        |            |
|-----------|---------------------------------------------------------|--------|------------|
| FER       | FER tyrosine kinase                                     | -1.626 | 2.99E-11   |
| FER1L4    | fer-1 like family member 4 (pseudogene)                 | 2.908  | 1.31E-17   |
| FEZF1     | FEZ family zinc finger 1                                | -3.652 | 0.00000713 |
| FEZF1-AS1 | FEZF1 antisense RNA 1                                   | -3.271 | 4.77E-14   |
| FGD6      | FYVE, RhoGEF and PH domain containing 6                 | 2.109  | 7.13E-11   |
| FIBCD1    | fibrinogen C domain containing 1                        | 1.744  | 0.000357   |
| FILIP1    | filamin A interacting protein 1                         | -1.902 | 0.00000186 |
| FKBP14    | FKBP prolyl isomerase 14                                | 1.559  | 1.82E-12   |
| FLJ22447  | uncharacterized LOC400221                               | 4.067  | 2.05E-28   |
| FLRT2     | fibronectin leucine rich transmembrane protein 2        | 2.135  | 2.88E-30   |
| FLRT3     | fibronectin leucine rich transmembrane protein 3        | -2.322 | 9.72E-31   |
| FMN2      | formin 2                                                | -2.066 | 2.29E-34   |
| FMNL1     | formin like 1                                           | 2.213  | 3.67E-38   |
| FOXA1     | forkhead box A1                                         | -1.89  | 5.44E-12   |
| FOXD3-AS1 | FOXD3 antisense RNA 1                                   | -3.718 | 0.000049   |
| FOXF1     | forkhead box F1                                         | 5.763  | 6.41E-16   |
| FOXF2     | forkhead box F2                                         | 1.672  | 0.0000345  |
| FOXG1     | forkhead box G1                                         | -1.793 | 1.31E-11   |
| FOXO4     | forkhead box O4                                         | 1.869  | 0.0000164  |
| FOXQ1     | forkhead box Q1                                         | 2.579  | 2.64E-08   |
| FOXRED2   | FAD dependent oxidoreductase domain containing 2        | -1.7   | 2.13E-19   |
| FPR1      | formyl peptide receptor 1                               | 7.918  | 7.42E-39   |
| FRAS1     | Fraser extracellular matrix complex subunit 1           | 2.095  | 0.000315   |
| FRMD3     | FERM domain containing 3                                | -1.559 | 1.02E-11   |
| FRZB      | frizzled related protein                                | -2.207 | 0.00000011 |
| FSIP1     | fibrous sheath interacting protein 1                    | -1.858 | 0.000107   |
| FST       | follicle stimulating hormone receptor 1                 | -1.824 | 1.69E-12   |
| GABBR2    | gamma-aminobutyric acid type B receptor subunit 2       | -2.384 | 1.41E-14   |
| GABRE     | gamma-aminobutyric acid type A receptor epsilon subunit | 3.004  | 4.84E-19   |
| GACAT2    | gastric cancer associated transcript 2                  | -3.512 | 0.00000262 |
| GALNT12   | polypeptide N-acetylgalactosaminyltransferase 12        | -3.32  | 0.000615   |
| GALNT18   | polypeptide N-acetylgalactosaminyltransferase 18        | 6.061  | 0.0000114  |
| GALNT6    | polypeptide N-acetylgalactosaminyltransferase 6         | -2.679 | 0.00000794 |
| GAP43     | growth associated protein 43                            | -2.231 | 3.66E-23   |
| GAREM2    | GRB2 associated regulator of MAPK1 subtype 2            | -3.585 | 1.12E-14   |
| GAS1      | growth arrest specific 1                                | 1.877  | 0.00000291 |
| GAS6-DT   | GAS6 divergent transcript                               | 2.71   | 3.51E-08   |

|        |                                                             |         |             |
|--------|-------------------------------------------------------------|---------|-------------|
| GAS7   | growth arrest specific 7                                    | 1.721   | 1.98E-18    |
| GATA2  | GATA binding protein 2                                      | -1.654  | 0.00000449  |
| GATA3  | GATA binding protein 3                                      | -2.292  | 5.88E-29    |
| GBP3   | guanylate binding protein 3                                 | 1.548   | 9.34E-12    |
| GBP4   | guanylate binding protein 4                                 | 4.049   | 1.55E-22    |
| GCNT1  | glucosaminyl (N-acetyl) transferase 1                       | 1.831   | 2.5E-28     |
| GDPD1  | glycerophosphodiester phosphodiesterase domain containing 1 | 2.157   | 0.0000472   |
| GFOD1  | glucose-fructose oxidoreductase domain containing 1         | 1.573   | 0.000000108 |
| GFPT2  | glutamine-fructose-6-phosphate transaminase 2               | 1.962   | 2.7E-46     |
| GIMAP2 | GTPase, IMAP family member 2                                | 3.525   | 2.02E-22    |
| GIMAP5 | GTPase, IMAP family member 5                                | 28.962  | 1.63E-08    |
| GIMAP6 | GTPase, IMAP family member 6                                | 19.018  | 4.42E-70    |
| GJA1   | gap junction protein alpha 1                                | 1.901   | 3.22E-48    |
| GJA3   | gap junction protein alpha 3                                | 2.521   | 2.38E-12    |
| GJB2   | gap junction protein beta 2                                 | 2.304   | 5.34E-61    |
| GLCE   | glucuronic acid epimerase                                   | 1.54    | 3.53E-13    |
| GLDC   | glycine decarboxylase                                       | 2.169   | 2.73E-19    |
| GLDN   | gliomedin                                                   | -2.733  | 0.00000684  |
| GLIS1  | GLIS family zinc finger 1                                   | -2.384  | 3.58E-08    |
| GNAL   | G protein subunit alpha L                                   | 4.213   | 7.05E-16    |
| GNAO1  | G protein subunit alpha o1                                  | 1.872   | 4.29E-09    |
| GNG7   | G protein subunit gamma 7                                   | -12.412 | 3.7E-17     |
| GOPC   | golgi associated PDZ and coiled-coil motif containing       | 1.693   | 2.04E-22    |
| GPC4   | glypican 4                                                  | -1.59   | 1.63E-19    |
| GPM6A  | glycoprotein M6A                                            | -4.538  | 6.82E-135   |
| GPR1   | G protein-coupled receptor 1                                | 3.988   | 0.00000343  |
| GPR156 | G protein-coupled receptor 156                              | -1.975  | 0.000129    |
| GPR160 | G protein-coupled receptor 160                              | 1.926   | 0.00000614  |
| GPR63  | G protein-coupled receptor 63                               | 1.879   | 0.00000134  |
| GPRC5B | G protein-coupled receptor class C group 5 member B         | -1.66   | 1.02E-09    |
| GPX3   | glutathione peroxidase 3                                    | -4.044  | 5.68E-15    |
| GRIN2A | glutamate ionotropic receptor NMDA type subunit 2A          | 3.452   | 3.59E-11    |
| GRIP1  | glutamate receptor interacting protein 1                    | 1.999   | 9.04E-11    |
| GRPR   | gastrin releasing peptide receptor                          | -3.276  | 3.03E-20    |
| GSDMC  | gasdermin C                                                 | 3.291   | 0.0000701   |
| GSN    | gelsolin                                                    | -1.772  | 3.57E-17    |
| GULP1  | GULP PTB domain containing engulfment adaptor 1             | -2.683  | 3.02E-42    |

|                     |                                                                            |        |             |
|---------------------|----------------------------------------------------------------------------|--------|-------------|
| GXYLT2              | glucoside xylosyltransferase 2                                             | 1.804  | 5.69E-14    |
| GYG2                | glycogenin 2                                                               | -3.142 | 8.01E-12    |
| GYPC                | glycophorin C (Gerbich blood group)                                        | -1.707 | 0.000189    |
| H2AC11              | H2A clustered histone 11                                                   | -2.288 | 0.000468    |
| H2AC6               | H2A clustered histone 6                                                    | -1.726 | 7.77E-08    |
| H2AW                | H2A.W histone                                                              | -2.243 | 0.00049     |
| H2BC12              | H2B clustered histone 12                                                   | -1.606 | 0.000000161 |
| HAS3                | hyaluronan synthase 3                                                      | 2.883  | 9.38E-62    |
| HBP1                | HMG-box transcription factor 1                                             | 1.594  | 2.02E-11    |
| HEPH                | hephaestin                                                                 | 2.167  | 4.27E-24    |
| HERC5               | HECT and RLD domain containing E3 ubiquitin protein ligase 5               | 1.996  | 3.98E-21    |
| HERC6               | HECT and RLD domain containing E3 ubiquitin protein ligase family member 6 | 1.753  | 0.000000895 |
| HES4                | hes family bHLH transcription factor 4                                     | -2.972 | 0.00000114  |
| HIVEP2              | HIVEP zinc finger 2                                                        | 1.919  | 4.83E-27    |
| HLA-DPA1            | major histocompatibility complex, class II, DP alpha 1                     | 8      | 8.34E-13    |
| HMCN1               | hemicentin 1                                                               | 2.205  | 1.39E-22    |
| HMGN5               | high mobility group nucleosome binding domain 5                            | 5.282  | 1.41E-25    |
| HMOX1               | heme oxygenase 1                                                           | 1.782  | 4E-27       |
| HNRNPUL2-BSCL2      | HNRNPUL2-BSCL2 readthrough (NMD candidate)                                 | -2.87  | 0.0000957   |
| HOXA6               | homeobox A6                                                                | -1.896 | 0.000797    |
| HOXA7               | homeobox A7                                                                | -4.225 | 3.84E-08    |
| HOXB5               | homeobox B5                                                                | -3.58  | 0.0000473   |
| HOXD13              | homeobox D13                                                               | -1.888 | 0.000264    |
| HPCAL1              | hippocalcin like 1                                                         | -1.599 | 3.99E-11    |
| HPS1                | HPS1 biogenesis of lysosomal organelles complex 3 subunit 1                | -1.624 | 3.27E-09    |
| HR                  | HR lysine demethylase and nuclear receptor corepressor                     | -2.221 | 1.79E-19    |
| HSPA5               | heat shock protein family A (Hsp70) member 5                               | 1.589  | 1.45E-26    |
| ICAM1               | intercellular adhesion molecule 1                                          | -2.088 | 0.000942    |
| ICOSLG/LOC102723996 | inducible T cell costimulator ligand                                       | 1.809  | 9.83E-15    |
| IDO1                | indoleamine 2,3-dioxygenase 1                                              | 6.136  | 9.45E-19    |
| IFI35               | interferon induced protein 35                                              | 1.696  | 0.00000084  |
| IFIT1               | interferon induced protein with tetratricopeptide repeats 1                | 2.071  | 7.93E-10    |
| IFIT3               | interferon induced protein with tetratricopeptide repeats 3                | 1.668  | 1.33E-10    |
| IGFBP2              | insulin like growth factor binding protein 2                               | -1.778 | 2.63E-16    |
| IGFBP3              | insulin like growth factor binding protein 3                               | 2.047  | 1.53E-36    |
| IGFBP4              | insulin like growth factor binding protein 4                               | 7.783  | 8.13E-307   |
| IGFBP5              | insulin like growth factor binding protein 5                               | -4.757 | 6.68E-183   |

|         |                                                                       |        |             |
|---------|-----------------------------------------------------------------------|--------|-------------|
| IGFBP6  | insulin like growth factor binding protein 6                          | 1.592  | 0.00000276  |
| IGSF10  | immunoglobulin superfamily member 10                                  | 3.117  | 5.99E-10    |
| IL11    | interleukin 11                                                        | 2.625  | 5.17E-36    |
| IL13RA2 | interleukin 13 receptor subunit alpha 2                               | 2.404  | 1.93E-46    |
| IL15RA  | interleukin 15 receptor subunit alpha                                 | 2.315  | 5.92E-08    |
| IL17RD  | interleukin 17 receptor D                                             | 1.828  | 1.05E-12    |
| IL24    | interleukin 24                                                        | 9.158  | 0.00000516  |
| IL27RA  | interleukin 27 receptor subunit alpha                                 | 2.194  | 1.98E-20    |
| IL4R    | interleukin 4 receptor                                                | 5.011  | 3.94E-46    |
| IL7     | interleukin 7                                                         | 2.089  | 0.0000152   |
| INAVA   | innate immunity activator                                             | -3.887 | 0.00000521  |
| INHBA   | inhibin subunit beta A                                                | -1.859 | 1.29E-18    |
| IQGAP2  | IQ motif containing GTPase activating protein 2                       | -3.111 | 6.62E-11    |
| IRF1    | interferon regulatory factor 1                                        | 1.931  | 5.18E-19    |
| IRF2BPL | interferon regulatory factor 2 binding protein like                   | -1.769 | 0.0000104   |
| IRX1    | iroquois homeobox 1                                                   | -1.864 | 0.00000975  |
| ISLR    | immunoglobulin superfamily containing leucine rich repeat             | -2.609 | 0.00015     |
| ISYNA1  | inositol-3-phosphate synthase 1                                       | -1.919 | 0.0000164   |
| ITGA1   | integrin subunit alpha 1                                              | 2.135  | 9.01E-21    |
| ITGA11  | integrin subunit alpha 11                                             | 2.101  | 8.91E-08    |
| ITGA2   | integrin subunit alpha 2                                              | 2.682  | 4.09E-73    |
| ITGB3   | integrin subunit beta 3                                               | 2.002  | 1.63E-29    |
| ITGBL1  | integrin subunit beta like 1                                          | -1.701 | 2.03E-10    |
| ITPK1   | inositol-tetrakisphosphate 1-kinase                                   | -1.602 | 1.16E-12    |
| JAG2    | jagged canonical Notch ligand 2                                       | 3.125  | 0.000000149 |
| JUP     | junction plakoglobin                                                  | -2.752 | 8.76E-12    |
| KALRN   | kalirin RhoGEF kinase                                                 | 2.136  | 1.71E-20    |
| KCNAB2  | potassium voltage-gated channel subfamily A regulatory beta subunit 2 | 2.344  | 2.13E-27    |
| KCNB1   | potassium voltage-gated channel subfamily B member 1                  | 16.671 | 6.96E-28    |
| KCND3   | potassium voltage-gated channel subfamily D member 3                  | -6.595 | 4.74E-19    |
| KCNH1   | potassium voltage-gated channel subfamily H member 1                  | -5.907 | 0.0000118   |
| KCNIP3  | potassium voltage-gated channel interacting protein 3                 | 1.965  | 3.09E-08    |
| KCNIP4  | potassium voltage-gated channel interacting protein 4                 | -2.827 | 5.69E-10    |
| KCNK2   | potassium two pore domain channel subfamily K member 2                | 1.803  | 0.000161    |
| KCNK5   | potassium two pore domain channel subfamily K member 5                | 16.382 | 0.000000252 |
| KCNMA1  | potassium calcium-activated channel subfamily M alpha 1               | 3.006  | 4.22E-136   |
| KCNN4   | potassium calcium-activated channel subfamily N member 4              | 1.856  | 1.21E-22    |

|           |                                                             |        |             |
|-----------|-------------------------------------------------------------|--------|-------------|
| KCTD15    | potassium channel tetramerization domain containing 15      | -2.279 | 8.59E-49    |
| KDEL3     | KDEL endoplasmic reticulum protein retention receptor 3     | 1.62   | 3.27E-13    |
| KDM5B     | lysine demethylase 5B                                       | 1.683  | 2.64E-22    |
| KIAA0319  | KIAA0319                                                    | 2.06   | 1.41E-09    |
| KIF17     | kinesin family member 17                                    | -2.713 | 0.0000483   |
| KIRREL3   | kirre like nephrin family adhesion molecule 3               | -1.734 | 7.06E-10    |
| KITLG     | KIT ligand                                                  | 2.576  | 1.83E-43    |
| KLF17     | Kruppel like factor 17                                      | 2.727  | 0.000237    |
| KLHL24    | kelch like family member 24                                 | 1.609  | 0.0000299   |
| KRT13     | keratin 13                                                  | -2.91  | 0.00736     |
| KRT18     | keratin 18                                                  | -1.878 | 1.82E-13    |
| KRT18P17  | keratin 18 pseudogene 17                                    | -6.294 | 0.0000324   |
| KRT81     | keratin 81                                                  | -2.693 | 3.29E-32    |
| KRT87P    | keratin 87 pseudogene                                       | -3.856 | 4.81E-09    |
| KSR1      | kinase suppressor of ras 1                                  | 1.573  | 2.08E-13    |
| L1CAM     | L1 cell adhesion molecule                                   | 2.628  | 2.77E-35    |
| L3HYPDH   | trans-L-3-hydroxyproline dehydratase                        | -1.593 | 0.00000316  |
| LAIR1     | leukocyte associated immunoglobulin like receptor 1         | 4.909  | 0.0000379   |
| LAMC2     | laminin subunit gamma 2                                     | 2.224  | 2.15E-10    |
| LCP1      | lymphocyte cytosolic protein 1                              | 1.668  | 6.12E-13    |
| LDHA      | lactate dehydrogenase A                                     | 1.58   | 2.08E-10    |
| LGR4      | leucine rich repeat containing G protein-coupled receptor 4 | 3.498  | 2.53E-55    |
| LGR5      | leucine rich repeat containing G protein-coupled receptor 5 | -2.778 | 1.09E-14    |
| LIN7B     | lin-7 homolog B, crumbs cell polarity complex component     | -1.754 | 0.000434    |
| LINC00052 | long intergenic non-protein coding RNA 52                   | -2.676 | 0.000315    |
| LINC00327 | long intergenic non-protein coding RNA 327                  | -2.551 | 0.00000035  |
| LINC00460 | long intergenic non-protein coding RNA 460                  | -2.929 | 3.56E-14    |
| LINC00461 | long intergenic non-protein coding RNA 461                  | -1.755 | 1.46E-22    |
| LINC00632 | long intergenic non-protein coding RNA 632                  | -2.521 | 0.000000031 |
| LINC00639 | long intergenic non-protein coding RNA 639                  | -2.195 | 8.01E-12    |
| LINC00665 | long intergenic non-protein coding RNA 665                  | -1.546 | 4.36E-12    |
| LINC00707 | long intergenic non-protein coding RNA 707                  | -1.728 | 6.17E-20    |
| LINC00963 | long intergenic non-protein coding RNA 963                  | 1.558  | 3.78E-12    |
| LINC01111 | long intergenic non-protein coding RNA 1111                 | -3.314 | 2.2E-10     |
| LINC01303 | long intergenic non-protein coding RNA 1303                 | 2.823  | 0.000000974 |
| LINC01503 | long intergenic non-protein coding RNA 1503                 | 2.141  | 0.000028    |
| LINC02593 | long intergenic non-protein coding RNA 2593                 | -1.617 | 4.74E-08    |

|              |                                                          |        |             |
|--------------|----------------------------------------------------------|--------|-------------|
| LINC02732    |                                                          | -2.726 | 9.8E-13     |
| LINGO2       | leucine rich repeat and Ig domain containing 2           | -6.8   | 5.51E-09    |
| LIPE         | lipase E, hormone sensitive type                         | -2.689 | 1.81E-10    |
| LIPG         | lipase G, endothelial type                               | 2.916  | 0.00000647  |
| LLGL2        | LLGL scribble cell polarity complex component 2          | -2.977 | 3.18E-12    |
| LMCD1        | LIM and cysteine rich domains 1                          | -1.97  | 2.54E-18    |
| LMO3         | LIM domain only 3                                        | -2.053 | 1.72E-24    |
| LNCAROD      | lncRNA activating regulator of DKK1                      | -1.714 | 5.18E-16    |
| LOC100129534 | small nuclear ribonucleoprotein polypeptide N pseudogene | 2.464  | 0.000286    |
| LOC100505501 | uncharacterized LOC100505501                             | 1.959  | 0.000295    |
| LOC100507516 | uncharacterized LOC100507516                             | -3.786 | 3.89E-33    |
| LOC101928663 | uncharacterized LOC101928663                             | 1.897  | 4.44E-10    |
| LOC101930370 | uncharacterized LOC101930370                             | 1.947  | 0.0000824   |
| LOC105369203 |                                                          | -2.169 | 2.12E-20    |
| LOC107984948 |                                                          | 2.192  | 0.000000828 |
| LOC339192    | uncharacterized LOC339192                                | 2.341  | 0.000252    |
| LOC643201    | centrosomal protein 192kDa pseudogene                    | 2.403  | 6.2E-19     |
| LOX          | lysyl oxidase                                            | 3.94   | 8.54E-53    |
| LOXL1-AS1    | LOXL1 antisense RNA 1                                    | 3.329  | 4.89E-18    |
| LOXL4        | lysyl oxidase like 4                                     | -2.089 | 3.82E-24    |
| LPL          | lipoprotein lipase                                       | -3.88  | 6.06E-39    |
| LPXN         | leupaxin                                                 | 2.068  | 8.75E-37    |
| LRAT         | lecithin retinol acyltransferase                         | -2.558 | 7.45E-23    |
| LRATD2       | LRAT domain containing 2                                 | -2.089 | 6.57E-34    |
| LRP1         | LDL receptor related protein 1                           | 1.68   | 3.67E-15    |
| LRP1B        | LDL receptor related protein 1B                          | 2.063  | 1.73E-17    |
| LRRC17       | leucine rich repeat containing 17                        | 3.777  | 2.59E-28    |
| LRRC2        | leucine rich repeat containing 2                         | -2.189 | 3.87E-15    |
| LRRC45       | leucine rich repeat containing 45                        | -2.058 | 2.72E-08    |
| LRRC4C       | leucine rich repeat containing 4C                        | 1.572  | 0.000000344 |
| LRRC8B       | leucine rich repeat containing 8 VRAC subunit B          | -2.072 | 3.51E-26    |
| LRRK1        | leucine rich repeat kinase 1                             | 2.038  | 0.0000375   |
| LTBP1        | latent transforming growth factor beta binding protein 1 | 3.274  | 5.01E-85    |
| LYPD1        | LY6/PLAUR domain containing 1                            | -1.574 | 3.95E-25    |
| MAGEH1       | MAGE family member H1                                    | 5.161  | 4.08E-37    |
| MAMDC2       | MAM domain containing 2                                  | 1.936  | 2.56E-39    |
| MAN1A1       | mannosidase alpha class 1A member 1                      | 1.844  | 3.31E-27    |

|            |                                                                |        |            |
|------------|----------------------------------------------------------------|--------|------------|
| MAN1C1     | mannosidase alpha class 1C member 1                            | -2.165 | 0.000509   |
| MAOA       | monoamine oxidase A                                            | 4.633  | 0.0000115  |
| MAP1A      | microtubule associated protein 1A                              | 1.973  | 2.27E-41   |
| MARCHF1    | membrane associated ring-CH-type finger 1                      | -1.947 | 7.08E-13   |
| MARCHF10   | membrane associated ring-CH-type finger 10                     | -6.337 | 1.09E-11   |
| MARCKSL1   | MARCKS like 1                                                  | -1.529 | 3.76E-10   |
| MARVELD1   | MARVEL domain containing 1                                     | -1.626 | 4.29E-14   |
| MAST4      | microtubule associated serine/threonine kinase family member 4 | 1.943  | 8.85E-18   |
| MATN2      | matrilin 2                                                     | 3.829  | 1.51E-147  |
| MATN3      | matrilin 3                                                     | -1.936 | 0.00317    |
| MCM5       | minichromosome maintenance complex component 5                 | -1.878 | 7.76E-29   |
| MCTP1      | multiple C2 and transmembrane domain containing 1              | 2.579  | 1.09E-23   |
| MDGA1      | MAM domain containing glycosylphosphatidylinositol anchor 1    | 2.117  | 5.05E-32   |
| MDK        | midkine                                                        | -4.893 | 1.48E-33   |
| MEF2C      | myocyte enhancer factor 2C                                     | -1.725 | 6.84E-10   |
| MEIS2      | Meis homeobox 2                                                | -1.652 | 5.05E-17   |
| MEIS3P1    | Meis homeobox 3 pseudogene 1                                   | -3.763 | 7.79E-17   |
| MEIS3P2    | Meis homeobox 3 pseudogene 2                                   | -2.98  | 0.000351   |
| MELTF      | melanotransferrin                                              | -2.317 | 3.67E-12   |
| MEST       | mesoderm specific transcript                                   | 2.02   | 7.04E-42   |
| METTL25    | methyltransferase like 25                                      | 1.929  | 0.000338   |
| MFSD3      | major facilitator superfamily domain containing 3              | -1.829 | 0.0000256  |
| MGC12916   | uncharacterized protein MGC12916                               | 2.483  | 1.47E-08   |
| MGLL       | monoglyceride lipase                                           | 1.841  | 7.94E-35   |
| MGP        | matrix Gla protein                                             | 2.134  | 1.13E-36   |
| MGRN1      | mahogunin ring finger 1                                        | -1.626 | 7.7E-09    |
| MGST1      | microsomal glutathione S-transferase 1                         | 1.584  | 6.72E-24   |
| MIR100HG   | mir-100-let-7a-2-mir-125b-1 cluster host gene                  | 1.974  | 4.67E-26   |
| MIRLET7BHG | MIRLET7B host gene                                             | -1.859 | 8.79E-13   |
| MME        | membrane metalloendopeptidase                                  | 2.313  | 6.62E-23   |
| MMP14      | matrix metallopeptidase 14                                     | 2.709  | 3.19E-91   |
| MMP17      | matrix metallopeptidase 17                                     | -6.829 | 1.44E-16   |
| MMP3       | matrix metallopeptidase 3                                      | 5.395  | 4E-16      |
| MMP7       | matrix metallopeptidase 7                                      | 5.167  | 5.19E-106  |
| MMP9       | matrix metallopeptidase 9                                      | 5.757  | 0.00000972 |
| MOXD1      | monooxygenase DBH like 1                                       | -2.058 | 5.13E-53   |
| MPP2       | membrane palmitoylated protein 2                               | -1.777 | 1.72E-10   |



|           |                                                                     |        |             |
|-----------|---------------------------------------------------------------------|--------|-------------|
| MRAP2     | melanocortin 2 receptor accessory protein 2                         | -3.592 | 0.000609    |
| MROCK1    | MARCKS cis regulating lncRNA promoter of cytokines and inflammation | -3.356 | 7.82E-28    |
| MSANTD2   | Myb/SANT DNA binding domain containing 2                            | -1.671 | 4.58E-14    |
| MT-RNR1   | s-rRNA                                                              | 1.844  | 9.25E-21    |
| MT-RNR2   | l-rRNA                                                              | 1.894  | 7.5E-47     |
| MT-TT     | tRNA                                                                | 2.158  | 0.0000935   |
| MT1E      | metallothionein 1E                                                  | -2.022 | 9.21E-16    |
| MTCL1     | microtubule crosslinking factor 1                                   | -1.829 | 9.82E-33    |
| MTFP1     | mitochondrial fission process 1                                     | -2.255 | 0.00654     |
| MTRNR2L1  | MT-RNR2 like 1                                                      | 1.911  | 0.00000686  |
| MTRNR2L10 | MT-RNR2 like 10                                                     | 2.305  | 1.87E-08    |
| MTRNR2L12 | MT-RNR2 like 12                                                     | 1.878  | 1.61E-18    |
| MTRNR2L2  | MT-RNR2 like 2                                                      | 1.763  | 1.44E-10    |
| MTRNR2L8  | MT-RNR2 like 8                                                      | 1.635  | 0.00000394  |
| MTSS1     | MTSS I-BAR domain containing 1                                      | 8.902  | 4.35E-44    |
| MYBL2     | MYB proto-oncogene like 2                                           | -1.766 | 1.48E-22    |
| MYEOV     | myeloma overexpressed                                               | -1.982 | 4.29E-18    |
| MYH15     | myosin heavy chain 15                                               | 2.33   | 4.29E-09    |
| MYH16     | myosin heavy chain 16 pseudogene                                    | 3.334  | 0.000487    |
| MYH3      | myosin heavy chain 3                                                | 2.61   | 0.000000374 |
| MYO5C     | myosin VC                                                           | -1.591 | 0.00000157  |
| MYOM1     | myomesin 1                                                          | -2.883 | 0.00068     |
| MYRF      | myelin regulatory factor                                            | 1.608  | 3.76E-12    |
| NACAD     | NAC alpha domain containing                                         | -1.829 | 0.000000128 |
| NACC2     | NACC family member 2                                                | -1.683 | 1.69E-12    |
| NAP1L2    | nucleosome assembly protein 1 like 2                                | 2.962  | 4.96E-11    |
| NAPA-AS1  | NAPA antisense RNA 1                                                | 2.6    | 0.000106    |
| NCOR2     | nuclear receptor corepressor 2                                      | -1.947 | 0.000000282 |
| NDUFV2    | NADH:ubiquinone oxidoreductase core subunit V2                      | 2.295  | 0.000118    |
| NEAT1     | nuclear paraspeckle assembly transcript 1                           | 1.533  | 1.19E-17    |
| NEDD9     | neural precursor cell expressed, developmentally down-regulated 9   | -1.666 | 1.3E-20     |
| NEGR1     | neuronal growth regulator 1                                         | -1.592 | 5.36E-08    |
| NEO1      | neogenin 1                                                          | 2.024  | 4.28E-29    |
| NES       | nestin                                                              | -2.734 | 8.27E-102   |
| NEUROG2   | neurogenin 2                                                        | -3.742 | 0.0000456   |
| NFASC     | neurofascin                                                         | 2.278  | 1.4E-44     |
| NFIA      | nuclear factor I A                                                  | -2.018 | 0.000511    |

|          |                                               |         |             |
|----------|-----------------------------------------------|---------|-------------|
| NIPAL2   | NIPA like domain containing 2                 | -2.491  | 0.000000257 |
| NIPSNAP1 | nipsnap homolog 1                             | -1.885  | 1.78E-15    |
| NISCH    | nischarin                                     | -1.654  | 1.25E-15    |
| NME3     | NME/NM23 nucleoside diphosphate kinase 3      | -3.916  | 3.12E-09    |
| NNMT     | nicotinamide N-methyltransferase              | 1.776   | 6.46E-19    |
| NOL6     | nucleolar protein 6                           | -1.579  | 4.27E-18    |
| NOTCH1   | notch receptor 1                              | -2.329  | 7.18E-09    |
| NPAS2    | neuronal PAS domain protein 2                 | 2.326   | 5.52E-28    |
| NPEPL1   | aminopeptidase like 1                         | -1.808  | 0.0000105   |
| NPTXR    | neuronal pentraxin receptor                   | 2.752   | 0.000000128 |
| NPY1R    | neuropeptide Y receptor Y1                    | -2.315  | 1.11E-09    |
| NQO2-AS1 |                                               | 4.745   | 0.000535    |
| NR1D2    | nuclear receptor subfamily 1 group D member 2 | 1.569   | 9.45E-19    |
| NR1H4    | nuclear receptor subfamily 1 group H member 4 | -9.412  | 1.25E-32    |
| NRBP2    | nuclear receptor binding protein 2            | -1.542  | 0.000000185 |
| NRG2     | neuregulin 2                                  | -1.935  | 5.9E-15     |
| NRXN3    | neurexin 3                                    | -4.214  | 4.87E-20    |
| NSUN5    | NOP2/Sun RNA methyltransferase 5              | -1.977  | 4.46E-11    |
| NT5C     | 5', 3'-nucleotidase, cytosolic                | -1.692  | 7.49E-08    |
| NT5DC2   | 5'-nucleotidase domain containing 2           | -1.703  | 2.28E-21    |
| NT5M     | 5',3'-nucleotidase, mitochondrial             | -1.872  | 0.0000489   |
| NTN1     | netrin 1                                      | 3.566   | 3.76E-34    |
| NTN4     | netrin 4                                      | 2.923   | 5.76E-59    |
| NTNG1    | netrin G1                                     | 3.57    | 5.48E-42    |
| NTRK3    | neurotrophic receptor tyrosine kinase 3       | -2.437  | 1.3E-25     |
| NUDT11   | nudix hydrolase 11                            | 2.722   | 0.000000978 |
| NUDT16L1 | nudix hydrolase 16 like 1                     | -1.821  | 0.000000155 |
| NUDT4    | nudix hydrolase 4                             | -1.547  | 9.19E-17    |
| NXPH4    | neurexophilin 4                               | 1.98    | 0.000000331 |
| OAS1     | 2'-5'-oligoadenylate synthetase 1             | 3.082   | 0.000462    |
| OCLN     | occludin                                      | 1.854   | 0.000103    |
| OLFML2B  | olfactomedin like 2B                          | 1.971   | 3.4E-24     |
| ONECUT1  | one cut homeobox 1                            | -3.15   | 0.00545     |
| OPLAH    | 5-oxoprolinase, ATP-hydrolysing               | -2.935  | 8.25E-09    |
| OPN3     | opsin 3                                       | -1.589  | 0.00000204  |
| OPRD1    | opioid receptor delta 1                       | -10.386 | 0.000000555 |
| OTOGL    | otogelin like                                 | -1.812  | 4.13E-08    |

|            |                                                         |        |             |
|------------|---------------------------------------------------------|--------|-------------|
| OTULINL    | OTU deubiquitinase with linear linkage specificity like | 1.9    | 0.00000042  |
| P3H2       | prolyl 3-hydroxylase 2                                  | 1.834  | 1.48E-32    |
| P4HA2      | prolyl 4-hydroxylase subunit alpha 2                    | 1.604  | 1.44E-17    |
| P4HTM      | prolyl 4-hydroxylase, transmembrane                     | -1.554 | 0.000000033 |
| PADI2      | peptidyl arginine deiminase 2                           | -8.004 | 0.000000636 |
| PALM2AKAP2 | PALM2 and AKAP2 fusion                                  | -2.798 | 0.00459     |
| PAPLN      | papilin, proteoglycan like sulfated glycoprotein        | 10.178 | 6.17E-09    |
| PAPPA      | pappalysin 1                                            | 2.136  | 2.98E-29    |
| PARM1      | prostate androgen-regulated mucin-like protein 1        | 6.336  | 1.38E-26    |
| PARVB      | parvin beta                                             | -2.785 | 0.000544    |
| PASK       | PAS domain containing serine/threonine kinase           | -1.527 | 8.76E-12    |
| PAX8       | paired box 8                                            | 2.972  | 3.2E-27     |
| PAX8-AS1   | PAX8 antisense RNA 1                                    | 5.236  | 1.02E-17    |
| PBX4       | PBX homeobox 4                                          | -3.157 | 4.52E-11    |
| PBXIP1     | PBX homeobox interacting protein 1                      | 1.704  | 2.23E-16    |
| PCDH10     | protocadherin 10                                        | -4.398 | 1.31E-101   |
| PCDH20     | protocadherin 20                                        | -8.649 | 6.68E-183   |
| PCDH9      | protocadherin 9                                         | -1.62  | 0.00000205  |
| PCDHGC3    | protocadherin gamma subfamily C, 3                      | 1.928  | 1.23E-31    |
| PCDHGC5    | protocadherin gamma subfamily C, 5                      | 2.02   | 1.61E-10    |
| PCSK4      | proprotein convertase subtilisin/kexin type 4           | -2.162 | 0.00117     |
| PDCD1LG2   | programmed cell death 1 ligand 2                        | 1.583  | 0.00000197  |
| PDE2A      | phosphodiesterase 2A                                    | 3.198  | 0.000000547 |
| PDE4A      | phosphodiesterase 4A                                    | -2.182 | 1.33E-20    |
| PDE5A      | phosphodiesterase 5A                                    | 3.097  | 0.00109     |
| PDGFC      | platelet derived growth factor C                        | 1.536  | 1.33E-16    |
| PDGFD      | platelet derived growth factor D                        | 1.646  | 2.45E-13    |
| PDK4       | pyruvate dehydrogenase kinase 4                         | 4.156  | 5.95E-16    |
| PDZD4      | PDZ domain containing 4                                 | 1.928  | 0.00000127  |
| PEAR1      | platelet endothelial aggregation receptor 1             | -2.38  | 7.84E-10    |
| PEG10      | paternally expressed 10                                 | -2.032 | 6.83E-64    |
| PER3       | period circadian regulator 3                            | 1.703  | 4.31E-21    |
| PFKP       | phosphofructokinase, platelet                           | -1.553 | 1.55E-13    |
| PGF        | placental growth factor                                 | -2.295 | 1.9E-16     |
| PHLDA2     | pleckstrin homology like domain family A member 2       | -2.639 | 1.35E-08    |
| PHRF1      | PHD and ring finger domains 1                           | -1.794 | 2.52E-09    |
| PIAS4      | protein inhibitor of activated STAT 4                   | -1.721 | 0.000000184 |

|            |                                                                             |         |             |
|------------|-----------------------------------------------------------------------------|---------|-------------|
| PICK1      | protein interacting with PRKCA 1                                            | -2.398  | 1.41E-26    |
| PIDD1      | p53-induced death domain protein 1                                          | -1.81   | 0.000227    |
| PIEZO2     | piezo type mechanosensitive ion channel component 2                         | -4.77   | 3.59E-28    |
| PIGZ       | phosphatidylinositol glycan anchor biosynthesis class Z                     | 2.09    | 0.00113     |
| PIK3CD-AS2 | PIK3CD antisense RNA 2                                                      | -3.667  | 0.0000832   |
| PITPNM3    | PITPNM family member 3                                                      | 1.664   | 0.000000201 |
| PKD1P5     | polycystin 1, transient receptor potential channel interacting pseudogene 5 | -2.089  | 0.00023     |
| PKMYT1     | protein kinase, membrane associated tyrosine/threonine 1                    | -2.06   | 1.45E-08    |
| PKN1       | protein kinase N1                                                           | -1.569  | 3.95E-11    |
| PKP2       | plakophilin 2                                                               | -1.568  | 3.72E-11    |
| PKP3       | plakophilin 3                                                               | -4.478  | 0.00000174  |
| PLAAT4     | phospholipase A and acyltransferase 4                                       | 2.096   | 8.32E-09    |
| PLAC8      | placenta associated 8                                                       | -14.677 | 1.81E-11    |
| PLAT       | plasminogen activator, tissue type                                          | -2.616  | 2.05E-66    |
| PLAUR      | plasminogen activator, urokinase receptor                                   | 1.671   | 4.6E-21     |
| PLB1       | phospholipase B1                                                            | 1.932   | 0.000249    |
| PLCB4      | phospholipase C beta 4                                                      | 2.068   | 1.02E-11    |
| PLEKHA7    | pleckstrin homology domain containing A7                                    | -1.999  | 2.63E-09    |
| PLEKHG4B   | pleckstrin homology and RhoGEF domain containing G4B                        | 2.195   | 0.000858    |
| PLEKHN1    | pleckstrin homology domain containing N1                                    | -1.794  | 0.0000399   |
| PLP1       | proteolipid protein 1                                                       | -4.355  | 0.000000646 |
| PLS1       | plastin 1                                                                   | 1.601   | 5.06E-13    |
| PLXNA4     | plexin A4                                                                   | 2.804   | 8.09E-10    |
| PLXND1     | plexin D1                                                                   | -1.554  | 1.69E-12    |
| PNMA2      | PNMA family member 2                                                        | 2.557   | 0.000000108 |
| PODXL      | podocalyxin like                                                            | 2.088   | 1.12E-62    |
| PODXL2     | podocalyxin like 2                                                          | 1.895   | 1.08E-11    |
| POSTN      | periostin                                                                   | -34.329 | 3.17E-37    |
| POU2F2     | POU class 2 homeobox 2                                                      | 2.489   | 0.0000765   |
| PPFIA2     | PTPRF interacting protein alpha 2                                           | -2.017  | 0.000000104 |
| PPM1H      | protein phosphatase, Mg2+/Mn2+ dependent 1H                                 | 4.584   | 2.65E-09    |
| PPM1M      | protein phosphatase, Mg2+/Mn2+ dependent 1M                                 | -1.826  | 2.64E-08    |
| PPP1R35    | protein phosphatase 1 regulatory subunit 35                                 | -1.714  | 8.61E-08    |
| PPP1R3B    | protein phosphatase 1 regulatory subunit 3B                                 | 1.654   | 3.2E-10     |
| PPP2R2B    | protein phosphatase 2 regulatory subunit Bbeta                              | -1.91   | 9.16E-36    |
| PPP2R2C    | protein phosphatase 2 regulatory subunit Bgamma                             | 5.685   | 2.19E-13    |
| PPP4R4     | protein phosphatase 4 regulatory subunit 4                                  | 3.351   | 0.0000605   |

|           |                                                                          |        |             |
|-----------|--------------------------------------------------------------------------|--------|-------------|
| PREX1     | phosphatidylinositol-3,4,5-trisphosphate dependent Rac exchange factor 1 | 2.032  | 8.23E-29    |
| PRKAR1B   | protein kinase cAMP-dependent type I regulatory subunit beta             | -1.839 | 1.73E-09    |
| PRKCZ     | protein kinase C zeta                                                    | 1.735  | 0.000000031 |
| PRKG1     | protein kinase cGMP-dependent 1                                          | 6.435  | 1.15E-11    |
| PRLR      | prolactin receptor                                                       | -1.975 | 1.1E-09     |
| PROX1     | prospero homeobox 1                                                      | -1.775 | 6.83E-08    |
| PRR16     | proline rich 16                                                          | 1.873  | 1.81E-09    |
| PRSS23    | serine protease 23                                                       | 1.858  | 1.87E-36    |
| PRSS35    | serine protease 35                                                       | -2.227 | 1.5E-34     |
| PRUNE2    | prune homolog 2 with BCH domain                                          | -1.878 | 1.14E-09    |
| PSD4      | pleckstrin and Sec7 domain containing 4                                  | 2.436  | 1.35E-23    |
| PSG5      | pregnancy specific beta-1-glycoprotein 5                                 | -5.325 | 0.000000773 |
| PSG9      | pregnancy specific beta-1-glycoprotein 9                                 | -3.653 | 0.000000334 |
| PSMB9     | proteasome subunit beta 9                                                | 1.721  | 7.31E-08    |
| PTCH1     | patched 1                                                                | -2.383 | 3.2E-10     |
| PTMAP5    | prothymosin alpha pseudogene 5                                           | -1.583 | 0.000272    |
| PTPRB     | protein tyrosine phosphatase receptor type B                             | -1.667 | 6.46E-18    |
| PTPRE     | protein tyrosine phosphatase receptor type E                             | 2.072  | 1.15E-23    |
| PTPRU     | protein tyrosine phosphatase receptor type U                             | 3.08   | 1.54E-31    |
| PTPRZ1    | protein tyrosine phosphatase receptor type Z1                            | -1.542 | 0.00000163  |
| PTX3      | pentraxin 3                                                              | 1.827  | 2.69E-21    |
| PXMP4     | peroxisomal membrane protein 4                                           | -1.666 | 5.29E-09    |
| PXYLP1    | 2-phosphoxylose phosphatase 1                                            | 1.856  | 3.97E-10    |
| PYCR1     | pyrroline-5-carboxylate reductase 1                                      | -1.716 | 5.82E-13    |
| RAB11FIP4 | RAB11 family interacting protein 4                                       | -2.946 | 1.23E-08    |
| RAB29     | RAB29, member RAS oncogene family                                        | 1.658  | 2.85E-18    |
| RAB6B     | RAB6B, member RAS oncogene family                                        | 1.657  | 5.44E-11    |
| RAET1G    | retinoic acid early transcript 1G                                        | 2.018  | 0.000151    |
| RAMP1     | receptor activity modifying protein 1                                    | -2.432 | 0.000563    |
| RANGRF    | RAN guanine nucleotide release factor                                    | -1.59  | 2.08E-10    |
| RAP1GAP2  | RAP1 GTPase activating protein 2                                         | 1.795  | 0.000000857 |
| RASGRF1   | Ras protein specific guanine nucleotide releasing factor 1               | -2.563 | 0.0000678   |
| RASSF7    | Ras association domain family member 7                                   | -2.182 | 0.0000198   |
| REEP1     | receptor accessory protein 1                                             | 2.295  | 3.11E-08    |
| REXO1     | RNA exonuclease 1 homolog                                                | -1.733 | 0.0000366   |
| RFX8      | RFX family member 8, lacking RFX DNA binding domain                      | 2.236  | 9.37E-23    |
| RGMA      | repulsive guidance molecule BMP co-receptor a                            | -3.126 | 3.6E-24     |

|               |                                                      |        |             |
|---------------|------------------------------------------------------|--------|-------------|
| RGS20         | regulator of G protein signaling 20                  | 2.006  | 1.13E-13    |
| RGS7          | regulator of G protein signaling 7                   | -1.842 | 1.5E-13     |
| RHBDD3        | rhomboid domain containing 3                         | -1.622 | 0.0000409   |
| RHOJ          | ras homolog family member J                          | -2.602 | 3.4E-61     |
| RHOT2         | ras homolog family member T2                         | -1.657 | 0.00000534  |
| RIMBP2        | RIMS binding protein 2                               | 11.445 | 3.17E-55    |
| RIMS3         | regulating synaptic membrane exocytosis 3            | -1.629 | 0.000000345 |
| RIN1          | Ras and Rab interactor 1                             | -1.681 | 0.000105    |
| RIN2          | Ras and Rab interactor 2                             | 1.649  | 5.2E-21     |
| RIPOR2        | RHO family interacting cell polarization regulator 2 | -4.163 | 3.59E-106   |
| RNF112        | ring finger protein 112                              | -4.107 | 1.04E-11    |
| RNF126        | ring finger protein 126                              | -1.985 | 0.0000849   |
| RNF152        | ring finger protein 152                              | 2.231  | 0.000000058 |
| RNF157        | ring finger protein 157                              | -1.702 | 1.49E-13    |
| RNF208        | ring finger protein 208                              | -4.672 | 0.000000355 |
| RNF24         | ring finger protein 24                               | 2.121  | 1.08E-45    |
| ROR1          | receptor tyrosine kinase like orphan receptor 1      | 2.159  | 5.55E-17    |
| RORA          | RAR related orphan receptor A                        | 2.981  | 0.00102     |
| ROS1          | ROS proto-oncogene 1, receptor tyrosine kinase       | 9.447  | 1.19E-90    |
| RP11_134G810  |                                                      | 1.877  | 0.000221    |
| RP11_138I14   |                                                      | 1.851  | 0.000394    |
| RP11_159D122  |                                                      | 1.68   | 0.00000632  |
| RP11_268J155  |                                                      | -2.281 | 7.93E-10    |
| RP11_284F2110 |                                                      | 3.501  | 8.63E-54    |
| RP11_284F217  |                                                      | 2.87   | 0.000000012 |
| RP11_284F219  |                                                      | 4.475  | 3.39E-09    |
| RP11_31F191   |                                                      | 3.343  | 0.000847    |
| RP11_320L112  |                                                      | 2.908  | 0.00000582  |
| RP11_39C101   |                                                      | 1.746  | 0.000000345 |
| RP11_424C202  |                                                      | -1.753 | 0.000189    |
| RP11_888D104  |                                                      | 2.759  | 0.000136    |
| RP1_140K85    |                                                      | 3.168  | 0.0000394   |
| RPS6KA2       | ribosomal protein S6 kinase A2                       | 2.948  | 1.28E-33    |
| RPUSD1        | RNA pseudouridine synthase domain containing 1       | -1.894 | 0.0000292   |
| RTL9          | retrotransposon Gag like 9                           | 2.141  | 2.17E-20    |
| RTN2          | reticulum 2                                          | 2.025  | 3.21E-09    |
| S100A2        | S100 calcium binding protein A2                      | 3.306  | 4.58E-54    |

|             |                                                             |        |             |
|-------------|-------------------------------------------------------------|--------|-------------|
| S100A3      | S100 calcium binding protein A3                             | 2.233  | 0.00000123  |
| S100A4      | S100 calcium binding protein A4                             | 2.146  | 4.67E-11    |
| S100B       | S100 calcium binding protein B                              | -3.455 | 8.68E-72    |
| SAA1        | serum amyloid A1                                            | 6.632  | 0.00000548  |
| SAMD10      | sterile alpha motif domain containing 10                    | -1.849 | 9.35E-08    |
| SAMD11      | sterile alpha motif domain containing 11                    | -2.534 | 2.82E-13    |
| SAMD5       | sterile alpha motif domain containing 5                     | -3.21  | 6.17E-34    |
| SAMD9L      | sterile alpha motif domain containing 9 like                | 1.652  | 6.76E-15    |
| SATB1       | SATB homeobox 1                                             | 1.761  | 0.00000083  |
| SCN4B       | sodium voltage-gated channel beta subunit 4                 | -2.184 | 0.000208    |
| SCNN1A      | sodium channel epithelial 1 alpha subunit                   | 3.974  | 1.61E-18    |
| SCNN1B      | sodium channel epithelial 1 beta subunit                    | 3.38   | 8.23E-08    |
| SCPEP1      | serine carboxypeptidase 1                                   | 1.732  | 2.36E-29    |
| SCUBE3      | signal peptide, CUB domain and EGF like domain containing 3 | 1.573  | 6.28E-12    |
| SDCBP2-AS1  | SDCBP2 antisense RNA 1                                      | 2.239  | 0.000665    |
| SEL1L3      | SEL1L family member 3                                       | 2.174  | 1.44E-50    |
| SELENOP     | selenoprotein P                                             | 2.595  | 0.00000177  |
| SELL        | selectin L                                                  | 3.646  | 3.72E-10    |
| SEMA3B      | semaphorin 3B                                               | -5.78  | 8.11E-48    |
| SEMA3C      | semaphorin 3C                                               | 1.877  | 2.54E-37    |
| SEMA3F      | semaphorin 3F                                               | 6.566  | 1.18E-21    |
| SEMA5A      | semaphorin 5A                                               | -1.636 | 0.0000665   |
| SEMA7A      | semaphorin 7A (John Milton Hagen blood group)               | 1.93   | 8.51E-34    |
| SEPTIN3     | septin 3                                                    | 1.666  | 0.00000365  |
| SEPTIN5     | septin 5                                                    | -1.782 | 5.29E-08    |
| SEPTIN6     | septin 6                                                    | 1.83   | 1.81E-12    |
| SERINC2     | serine incorporator 2                                       | 5.888  | 2.38E-69    |
| SERPINA1    | serpin family A member 1                                    | 2.51   | 1.39E-15    |
| SERPINA5    | serpin family A member 5                                    | 2.157  | 0.0000649   |
| SERPINE1    | serpin family E member 1                                    | 2.024  | 5.43E-41    |
| SERPINE2    | serpin family E member 2                                    | 1.746  | 2.22E-30    |
| SERPINH1    | serpin family H member 1                                    | -3.539 | 8.57E-63    |
| SERTAD4-AS1 | SERTAD4 antisense RNA 1                                     | -1.959 | 0.00000269  |
| SETBP1      | SET binding protein 1                                       | 1.636  | 4.29E-12    |
| SF3A2       | splicing factor 3a subunit 2                                | -1.556 | 0.000000251 |
| SFR1        | SWI5 dependent homologous recombination repair protein 1    | 1.574  | 0.000000892 |
| SFRP1       | secreted frizzled related protein 1                         | 1.742  | 6.69E-16    |

|           |                                                   |        |             |
|-----------|---------------------------------------------------|--------|-------------|
| SGK1      | serum/glucocorticoid regulated kinase 1           | -1.522 | 1.37E-12    |
| SGSH      | N-sulfoglucosamine sulfohydrolase                 | -1.989 | 1.66E-23    |
| SH2D4A    | SH2 domain containing 4A                          | -2.931 | 0.00000128  |
| SH3BGRL2  | SH3 domain binding glutamate rich protein like 2  | 1.972  | 9.96E-09    |
| SH3D21    | SH3 domain containing 21                          | -3.155 | 3.35E-37    |
| SH3PXD2A  | SH3 and PX domains 2A                             | 1.953  | 3.46E-36    |
| SHC2      | SHC adaptor protein 2                             | -2.599 | 0.0000566   |
| SHISAL1   | shisa like 1                                      | 3.754  | 0.00000281  |
| SHROOM2   | shroom family member 2                            | -3.461 | 0.00000742  |
| SIAE      | sialic acid acetyltransferase                     | 1.577  | 4.21E-12    |
| SIGLEC22P | sialic acid binding Ig like lectin 22, pseudogene | 6.637  | 0.00000666  |
| SIGMAR1   | sigma non-opioid intracellular receptor 1         | -1.597 | 0.00000807  |
| SIPA1     | signal-induced proliferation-associated 1         | -1.916 | 0.0000049   |
| SLAIN1    | SLAIN motif family member 1                       | -1.515 | 5.8E-12     |
| SLC12A7   | solute carrier family 12 member 7                 | 3.216  | 9.47E-18    |
| SLC12A8   | solute carrier family 12 member 8                 | -2.564 | 2.59E-08    |
| SLC15A2   | solute carrier family 15 member 2                 | 2.838  | 0.00000304  |
| SLC16A14  | solute carrier family 16 member 14                | -2.161 | 0.0000256   |
| SLC16A2   | solute carrier family 16 member 2                 | 1.568  | 8.78E-20    |
| SLC16A3   | solute carrier family 16 member 3                 | -1.749 | 7.87E-08    |
| SLC16A7   | solute carrier family 16 member 7                 | -3.038 | 0.00000932  |
| SLC16A9   | solute carrier family 16 member 9                 | -2.298 | 3.79E-38    |
| SLC1A3    | solute carrier family 1 member 3                  | 1.898  | 4.43E-34    |
| SLC20A1   | solute carrier family 20 member 1                 | 1.546  | 1.38E-23    |
| SLC22A4   | solute carrier family 22 member 4                 | 1.785  | 0.000000122 |
| SLC25A22  | solute carrier family 25 member 22                | -1.577 | 0.00000705  |
| SLC25A23  | solute carrier family 25 member 23                | 1.94   | 3.47E-30    |
| SLC25A27  | solute carrier family 25 member 27                | 4.028  | 0.000167    |
| SLC25A28  | solute carrier family 25 member 28                | -1.653 | 5.41E-14    |
| SLC26A11  | solute carrier family 26 member 11                | -2.286 | 2.45E-16    |
| SLC27A6   | solute carrier family 27 member 6                 | -3.191 | 0.000262    |
| SLC2A12   | solute carrier family 2 member 12                 | 7.566  | 4.49E-54    |
| SLC2A13   | solute carrier family 2 member 13                 | 3.614  | 4.54E-10    |
| SLC2A8    | solute carrier family 2 member 8                  | -1.562 | 0.000000461 |
| SLC30A3   | solute carrier family 30 member 3                 | 4.183  | 4.06E-08    |
| SLC37A2   | solute carrier family 37 member 2                 | 2.434  | 1.32E-08    |
| SLC38A11  | solute carrier family 38 member 11                | 1.794  | 0.000291    |



|           |                                                                 |        |             |
|-----------|-----------------------------------------------------------------|--------|-------------|
| SLC38A2   | solute carrier family 38 member 2                               | 1.61   | 4.48E-17    |
| SLC38A3   | solute carrier family 38 member 3                               | 4.405  | 3.62E-27    |
| SLC39A8   | solute carrier family 39 member 8                               | 1.56   | 8.59E-10    |
| SLC40A1   | solute carrier family 40 member 1                               | -1.941 | 0.000966    |
| SLC43A1   | solute carrier family 43 member 1                               | 1.773  | 0.000584    |
| SLC43A2   | solute carrier family 43 member 2                               | -1.715 | 4.38E-08    |
| SLC43A3   | solute carrier family 43 member 3                               | -1.602 | 2.75E-11    |
| SLC44A5   | solute carrier family 44 member 5                               | -5.212 | 7.04E-18    |
| SLC7A11   | solute carrier family 7 member 11                               | -1.683 | 2.2E-14     |
| SLC8A1    | solute carrier family 8 member A1                               | 3.513  | 5.44E-67    |
| SLCO4A1   | solute carrier organic anion transporter family member 4A1      | 3.202  | 9.96E-41    |
| SLCO5A1   | solute carrier organic anion transporter family member 5A1      | -2.19  | 4.33E-16    |
| SLPI      | secretory leukocyte peptidase inhibitor                         | 22.511 | 9.14E-25    |
| SMIM25    | small integral membrane protein 25                              | 2.019  | 0.000217    |
| SMPDL3B   | sphingomyelin phosphodiesterase acid like 3B                    | 4.235  | 2.16E-08    |
| SMTN      | smoothelin                                                      | -1.94  | 1.51E-14    |
| SNHG11    | small nucleolar RNA host gene 11                                | -1.98  | 0.0000312   |
| SNHG19    | small nucleolar RNA host gene 19                                | -1.71  | 0.00000497  |
| SNHG25    |                                                                 | -1.944 | 0.000315    |
| SNHG9     | small nucleolar RNA host gene 9                                 | -2.093 | 1.83E-08    |
| SOCS2     | suppressor of cytokine signaling 2                              | -1.678 | 9.35E-17    |
| SOCS2-AS1 | SOCS2 antisense RNA 1                                           | -1.749 | 7.81E-08    |
| SOCS5     | suppressor of cytokine signaling 5                              | 1.559  | 1.5E-15     |
| SORBS3    | sorbin and SH3 domain containing 3                              | -1.679 | 8.28E-20    |
| SORCS2    | sortilin related VPS10 domain containing receptor 2             | 6.164  | 5.14E-37    |
| SOX13     | SRY-box transcription factor 13                                 | -1.704 | 2.64E-22    |
| SOX2      | SRY-box transcription factor 2                                  | -1.525 | 7.59E-11    |
| SOX2-OT   | SOX2 overlapping transcript                                     | -3.73  | 5.66E-109   |
| SOX6      | SRY-box transcription factor 6                                  | -2.499 | 0.00000727  |
| SP140     | SP140 nuclear body protein                                      | 2.572  | 0.000751    |
| SPA17     | sperm autoantigenic protein 17                                  | 1.621  | 2.25E-09    |
| SPAAR     | small regulatory polypeptide of amino acid response             | -1.663 | 0.000000206 |
| SPATC1L   | spermatogenesis and centriole associated 1 like                 | -2.338 | 3.2E-09     |
| SPINT1    | serine peptidase inhibitor, Kunitz type 1                       | -2.504 | 0.00000219  |
| SPOCK1    | SPARC (osteonectin), cwcw and kazal like domains proteoglycan 1 | -1.666 | 1.14E-25    |
| SPP1      | secreted phosphoprotein 1                                       | -2.433 | 1.05E-69    |
| SPSB1     | splA/ryanodine receptor domain and SOCS box containing 1        | 2.68   | 3.87E-33    |

|         |                                                              |        |            |
|---------|--------------------------------------------------------------|--------|------------|
| SQOR    | sulfide quinone oxidoreductase                               | 2.022  | 7.05E-18   |
| SSBP4   | single stranded DNA binding protein 4                        | -2.007 | 0.0000353  |
| ST8SIA1 | ST8 alpha-N-acetyl-neuraminide alpha-2,8-sialyltransferase 1 | 3.017  | 0.0000345  |
| STAT5A  | signal transducer and activator of transcription 5A          | -2.034 | 0.00000742 |
| STC1    | stanniocalcin 1                                              | 1.818  | 1.41E-31   |
| STC2    | stanniocalcin 2                                              | -1.564 | 8.02E-13   |
| STEAP1  | STEAP family member 1                                        | 5.707  | 5.36E-28   |
| STEAP2  | STEAP2 metalloredutase                                       | 2.567  | 0.00000907 |
| STK17A  | serine/threonine kinase 17a                                  | 1.586  | 2.32E-18   |
| STK32B  | serine/threonine kinase 32B                                  | -1.811 | 2.5E-09    |
| STMN3   | stathmin 3                                                   | 1.949  | 2.63E-11   |
| STOM    | stomatin                                                     | -2.093 | 7.3E-44    |
| STON2   | stonin 2                                                     | 1.784  | 2.29E-12   |
| STRA6   | stimulated by retinoic acid 6                                | -3.206 | 1.29E-36   |
| STRN4   | striatin 4                                                   | -1.539 | 2.79E-08   |
| STXBP6  | syntaxin binding protein 6                                   | 1.633  | 0.0000141  |
| SUGT1P1 | SUGT1 pseudogene 1                                           | -1.982 | 0.00052    |
| SULF1   | sulfatase 1                                                  | -4.301 | 1.86E-71   |
| SULF2   | sulfatase 2                                                  | 1.66   | 1.48E-22   |
| SURF2   | surfeit 2                                                    | -1.821 | 0.000171   |
| SUSD1   | sushi domain containing 1                                    | -1.961 | 0.00000171 |
| SUSD2   | sushi domain containing 2                                    | 2.146  | 0.000666   |
| SYDE1   | synapse defective Rho GTPase homolog 1                       | -1.649 | 5.22E-08   |
| SYNC    | syncoilin, intermediate filament protein                     | 1.675  | 6.72E-17   |
| SYNE3   | spectrin repeat containing nuclear envelope family member 3  | -2.206 | 0.000166   |
| SYNGR1  | synaptogyrin 1                                               | -2.983 | 7.61E-11   |
| SYNPO   | synaptopodin                                                 | 1.865  | 1.86E-26   |
| SYTL2   | synaptotagmin like 2                                         | 1.587  | 0.00000715 |
| TACR1   | tachykinin receptor 1                                        | 2.171  | 5.41E-20   |
| TAGLN   | transgelin                                                   | -2.988 | 4.33E-18   |
| TAGLN3  | transgelin 3                                                 | 1.867  | 0.00101    |
| TBC1D4  | TBC1 domain family member 4                                  | 2.36   | 4.63E-40   |
| TBC1D8  | TBC1 domain family member 8                                  | 1.591  | 0.00000019 |
| TBC1D8B | TBC1 domain family member 8B                                 | 1.705  | 0.0000138  |
| TBX2    | T-box transcription factor 2                                 | -1.638 | 0.0000118  |
| TCN1    | transcobalamin 1                                             | 3.125  | 4.9E-26    |
| TCN2    | transcobalamin 2                                             | 1.702  | 0.000373   |

|           |                                                      |        |             |
|-----------|------------------------------------------------------|--------|-------------|
| TEAD4     | TEA domain transcription factor 4                    | -1.594 | 0.00000185  |
| TEF       | TEF transcription factor, PAR bZIP family member     | 2.241  | 4.61E-36    |
| TELO2     | telomere maintenance 2                               | -1.809 | 0.000074    |
| TENM2     | teneurin transmembrane protein 2                     | 1.623  | 1.28E-24    |
| TENM4     | teneurin transmembrane protein 4                     | 1.626  | 7.98E-16    |
| TEX15     | testis expressed 15, meiosis and synapsis associated | 4.88   | 2.81E-08    |
| TEX9      | testis expressed 9                                   | 1.612  | 0.0000127   |
| TFAP2B    | transcription factor AP-2 beta                       | -2.125 | 0.00461     |
| TFAP2C    | transcription factor AP-2 gamma                      | -1.613 | 9.24E-25    |
| TFCP2L1   | transcription factor CP2 like 1                      | 2.093  | 0.000299    |
| TFEB      | transcription factor EB                              | 1.69   | 9.51E-08    |
| TGFB2     | transforming growth factor beta 2                    | 1.628  | 1.51E-13    |
| TGFB3     | transforming growth factor beta 3                    | 2.337  | 5.3E-23     |
| TGFB1     | transforming growth factor beta induced              | 1.536  | 4.69E-18    |
| TGM2      | transglutaminase 2                                   | -1.903 | 2.09E-27    |
| THEMIS2   | thymocyte selection associated family member 2       | -3.696 | 0.0000227   |
| THNSL2    | threonine synthase like 2                            | -4.932 | 8.36E-13    |
| THSD1     | thrombospondin type 1 domain containing 1            | 2.273  | 7.58E-26    |
| TIAM1     | T cell lymphoma invasion and metastasis 1            | 1.762  | 4.6E-16     |
| TIGD5     | tigger transposable element derived 5                | -1.801 | 0.000122    |
| TIMP4     | TIMP metalloproteinase inhibitor 4                   | 2.156  | 6.17E-13    |
| TKTL1     | transketolase like 1                                 | 3.465  | 2.62E-29    |
| TLCD4     | TLC domain containing 4                              | 1.559  | 0.000000404 |
| TLR1      | toll like receptor 1                                 | 2.271  | 1.34E-08    |
| TLR3      | toll like receptor 3                                 | 2.517  | 0.000153    |
| TLR6      | toll like receptor 6                                 | 1.788  | 7E-14       |
| TLX2      | T cell leukemia homeobox 2                           | -2.376 | 0.00102     |
| TM4SF18   | transmembrane 4 L six family member 18               | 1.686  | 0.0000123   |
| TMC7      | transmembrane channel like 7                         | 1.702  | 0.0000635   |
| TMCC1-AS1 | TMCC1 antisense RNA 1 (head to head)                 | 1.86   | 0.000136    |
| TMCO6     | transmembrane and coiled-coil domains 6              | -2.356 | 0.000338    |
| TMEM100   | transmembrane protein 100                            | -2.676 | 0.00000698  |
| TMEM140   | transmembrane protein 140                            | 1.862  | 0.0000508   |
| TMEM158   | transmembrane protein 158 (gene/pseudogene)          | 3.105  | 1.66E-79    |
| TMEM171   | transmembrane protein 171                            | -3.343 | 0.000000208 |
| TMEM179   | transmembrane protein 179                            | 2.938  | 0.00000903  |
| TMEM200A  | transmembrane protein 200A                           | -4.624 | 1.21E-08    |

|          |                                                                  |        |             |
|----------|------------------------------------------------------------------|--------|-------------|
| TMEM200B | transmembrane protein 200B                                       | -1.787 | 7.24E-09    |
| TMEM200C | transmembrane protein 200C                                       | -1.871 | 4.42E-16    |
| TMEM201  | transmembrane protein 201                                        | -1.73  | 2.33E-08    |
| TMEM220  | transmembrane protein 220                                        | -3.503 | 5.44E-11    |
| TMEM229B | transmembrane protein 229B                                       | -4.131 | 1.47E-08    |
| TMEM25   | transmembrane protein 25                                         | -2.872 | 4.55E-11    |
| TMEM255A | transmembrane protein 255A                                       | 3.066  | 3.47E-14    |
| TMEM255B | transmembrane protein 255B                                       | 6.102  | 4.14E-14    |
| TMEM38A  | transmembrane protein 38A                                        | 1.794  | 0.000000163 |
| TMEM40   | transmembrane protein 40                                         | -3.112 | 0.000275    |
| TMEM71   | transmembrane protein 71                                         | 2.654  | 3.32E-20    |
| TMSB15A  | thymosin beta 15a                                                | 4.206  | 7.84E-16    |
| TMTC1    | transmembrane O-mannosyltransferase targeting cadherins 1        | 2.252  | 4.12E-39    |
| TMUB1    | transmembrane and ubiquitin like domain containing 1             | -1.898 | 0.000000759 |
| TNC      | tenascin C                                                       | 1.842  | 8.79E-33    |
| TNFAIP6  | TNF alpha induced protein 6                                      | 2.475  | 0.00101     |
| TNFRSF21 | TNF receptor superfamily member 21                               | 2.926  | 3.63E-80    |
| TNFSF10  | TNF superfamily member 10                                        | 3.003  | 1.67E-34    |
| TNFSF4   | TNF superfamily member 4                                         | -9.034 | 1.31E-115   |
| TNNT1    | troponin T1, slow skeletal type                                  | 2.322  | 3.53E-14    |
| TOR4A    | torsin family 4 member A                                         | -3.395 | 1.53E-18    |
| TOX      | thymocyte selection associated high mobility group box           | 2.217  | 2.73E-13    |
| TP53I11  | tumor protein p53 inducible protein 11                           | 2.87   | 2.66E-53    |
| TPPP     | tubulin polymerization promoting protein                         | 2.821  | 1.99E-10    |
| TPRG1    | tumor protein p63 regulated 1                                    | 3.157  | 5.13E-09    |
| TRABD    | TraB domain containing                                           | -1.829 | 0.0000723   |
| TRABD2A  | TraB domain containing 2A                                        | 3.873  | 1.37E-39    |
| TRAF1    | TNF receptor associated factor 1                                 | 2.083  | 1.82E-27    |
| TRANK1   | tetratricopeptide repeat and ankyrin repeat containing 1         | 1.752  | 6.78E-09    |
| TRAPPC9  | trafficking protein particle complex 9                           | -1.673 | 2.07E-13    |
| TRIM38   | tripartite motif containing 38                                   | -3.059 | 1.19E-25    |
| TRIM6    | tripartite motif containing 6                                    | 2.945  | 2.14E-10    |
| TRPC3    | transient receptor potential cation channel subfamily C member 3 | -3.484 | 1.05E-10    |
| TRPM3    | transient receptor potential cation channel subfamily M member 3 | -3.026 | 1.28E-16    |
| TSEN54   | tRNA splicing endonuclease subunit 54                            | -1.637 | 5.56E-13    |
| TSHZ2    | teashirt zinc finger homeobox 2                                  | 4.002  | 0.000000171 |
| TSPAN1   | tetraspanin 1                                                    | 2.23   | 0.000975    |

|           |                                                        |        |             |
|-----------|--------------------------------------------------------|--------|-------------|
| TSPAN12   | tetraspanin 12                                         | 5.181  | 0.000000453 |
| TSTD1     | thiosulfate sulfurtransferase like domain containing 1 | -2.131 | 7.03E-10    |
| TTBK1     | tau tubulin kinase 1                                   | -4.738 | 2.46E-28    |
| TTC39A    | tetratricopeptide repeat domain 39A                    | -3.43  | 0.0000647   |
| TTC3P1    | tetratricopeptide repeat domain 3 pseudogene 1         | 2.038  | 1.23E-20    |
| TTYH2     | tweety family member 2                                 | 2.043  | 0.000202    |
| TUBA4A    | tubulin alpha 4a                                       | 1.557  | 1.71E-08    |
| TUBB2A    | tubulin beta 2A class IIa                              | -1.552 | 9.53E-09    |
| TUBB2B    | tubulin beta 2B class IIb                              | -2.648 | 5.58E-27    |
| TUBB4A    | tubulin beta 4A class IVa                              | 2.204  | 0.000000241 |
| TXK       | TXK tyrosine kinase                                    | -2.777 | 4.86E-10    |
| TYMSOS    | TYMS opposite strand                                   | -2.557 | 0.000000211 |
| UBE2L6    | ubiquitin conjugating enzyme E2 L6                     | 1.645  | 2.21E-09    |
| UCA1      | urothelial cancer associated 1                         | 82.794 | 2.51E-26    |
| UCN2      | urocortin 2                                            | 1.718  | 3.51E-11    |
| UFSP1     | UFM1 specific peptidase 1 (inactive)                   | -2.448 | 0.000819    |
| UNC5B     | unc-5 netrin receptor B                                | 2.051  | 0.000389    |
| USP46-AS1 | USP46 antisense RNA 1                                  | 2.025  | 0.00153     |
| UST       | uronyl 2-sulfotransferase                              | 1.823  | 1.17E-24    |
| VAC14-AS1 | VAC14 antisense RNA 1                                  | 3.205  | 0.000657    |
| VAT1L     | vesicle amine transport 1 like                         | -8.944 | 1.45E-22    |
| VDR       | vitamin D receptor                                     | 1.862  | 1.33E-12    |
| VEGFA     | vascular endothelial growth factor A                   | 1.849  | 2.71E-38    |
| VGLL3     | vestigial like family member 3                         | -2.457 | 3.48E-09    |
| VIT       | vitrin                                                 | -2.857 | 7.08E-24    |
| VPS35L    | VPS35 endosomal protein sorting factor like            | -1.643 | 1.38E-08    |
| VSNL1     | visinin like 1                                         | -1.622 | 2.33E-08    |
| VSTM4     | V-set and transmembrane domain containing 4            | 4.949  | 0.0000156   |
| VWA5A     | von Willebrand factor A domain containing 5A           | 2.461  | 2.68E-10    |
| VWCE      | von Willebrand factor C and EGF domains                | 3.092  | 0.0000605   |
| VWDE      | von Willebrand factor D and EGF domains                | -1.831 | 1.58E-11    |
| WDR34     | WD repeat domain 34                                    | -1.538 | 0.000000881 |
| WDR90     | WD repeat domain 90                                    | -1.819 | 0.0000016   |
| WIPI1     | WD repeat domain, phosphoinositide interacting 1       | 1.811  | 7.36E-12    |
| WNK2      | WNK lysine deficient protein kinase 2                  | -4.518 | 2.56E-08    |
| WNT5B     | Wnt family member 5B                                   | 1.808  | 1.01E-15    |
| WSCD1     | WSC domain containing 1                                | -1.62  | 5.15E-09    |

|           |                                                        |        |             |
|-----------|--------------------------------------------------------|--------|-------------|
| WT1       | WT1 transcription factor                               | -1.812 | 0.00003     |
| WWC1      | WW and C2 domain containing 1                          | 1.735  | 2.5E-15     |
| WWC3      | WWC family member 3                                    | -1.548 | 6.04E-15    |
| XDH       | xanthine dehydrogenase                                 | 3.199  | 9.22E-39    |
| YDJC      | YdjC chitooligosaccharide deacetylase homolog          | -1.947 | 0.0000335   |
| YPEL2     | yippee like 2                                          | 1.844  | 0.000753    |
| YPEL3     | yippee like 3                                          | -1.991 | 0.0000834   |
| ZADH2     | zinc binding alcohol dehydrogenase domain containing 2 | 1.691  | 1.46E-16    |
| ZBTB38    | zinc finger and BTB domain containing 38               | 1.538  | 2.13E-18    |
| ZBTB47    | zinc finger and BTB domain containing 47               | -1.742 | 0.000000457 |
| ZC3H12B   | zinc finger CCCH-type containing 12B                   | 2.212  | 0.000175    |
| ZCWPW1    | zinc finger CW-type and PWWP domain containing 1       | 1.972  | 0.00000614  |
| ZDHHC12   | zinc finger DHHC-type containing 12                    | -1.574 | 0.00000499  |
| ZFHX2     | zinc finger homeobox 2                                 | 2.231  | 0.00000794  |
| ZFHX4-AS1 | ZFHX4 antisense RNA 1                                  | -2.962 | 7.07E-17    |
| ZFP82     | ZFP82 zinc finger protein                              | -1.648 | 0.000000607 |
| ZFPM2-AS1 | ZFPM2 antisense RNA 1                                  | -2.319 | 1.82E-08    |
| ZFYVE28   | zinc finger FYVE-type containing 28                    | 2.075  | 0.00012     |
| ZGPAT     | zinc finger CCCH-type and G-patch domain containing    | -1.793 | 0.000444    |
| ZIC2      | Zic family member 2                                    | 5.998  | 0.00000023  |
| ZMIZ1     | zinc finger MIZ-type containing 1                      | 1.588  | 8.14E-17    |
| ZMIZ1-AS1 | ZMIZ1 antisense RNA 1                                  | 2.43   | 2.95E-12    |
| ZNF239    | zinc finger protein 239                                | -1.624 | 0.0000191   |
| ZNF415    | zinc finger protein 415                                | -1.61  | 0.00000191  |
| ZNF469    | zinc finger protein 469                                | -1.59  | 0.000142    |
| ZNF506    | zinc finger protein 506                                | -2.186 | 4.32E-14    |
| ZNF542P   | zinc finger protein 542, pseudogene                    | -1.717 | 1.01E-13    |
| ZNF593    | zinc finger protein 593                                | -1.584 | 0.000157    |
| ZNF598    | zinc finger protein 598                                | -1.745 | 0.0000243   |
| ZNF620    | zinc finger protein 620                                | -1.861 | 1.47E-08    |
| ZNF660    | zinc finger protein 660                                | -4.087 | 0.000000461 |
| ZNF677    | zinc finger protein 677                                | -1.755 | 2.56E-10    |
| ZNF688    | zinc finger protein 688                                | -1.903 | 0.00276     |
| ZNF69     | zinc finger protein 69                                 | -1.934 | 0.00000147  |
| ZNF702P   | zinc finger protein 702, pseudogene                    | -2.676 | 2.46E-08    |
| ZNF730    | zinc finger protein 730                                | -2.211 | 0.0000413   |
| ZNF771    | zinc finger protein 771                                | -1.837 | 0.00104     |

|         |                                           |        |             |
|---------|-------------------------------------------|--------|-------------|
| ZNF793  | zinc finger protein 793                   | -3.166 | 3.9E-13     |
| ZNF853  | zinc finger protein 853                   | -2.96  | 8.99E-21    |
| ZSCAN5A | zinc finger and SCAN domain containing 5A | 1.949  | 0.000000794 |
| ZSWIM5  | zinc finger SWIM-type containing 5        | -1.652 | 0.000000167 |
