# Supplementary material for: mTORC2/Rac1 Pathway Predisposes Cancer Aggressiveness in IDH1-Mutated Glioma
Source: MDPI journal article supplement (doi:10.3390/cancers12040787), 2020-03-26
Supplement: s1 [file s1]

Supplementary Table 2. List of differentially expressed cell movement related genes in U251 IDH1 R132H compared with U251 IDH1 WT

| Gene Symbol | Entrez Gene Name                                 | Fold Change | FDR         |
|-------------|--------------------------------------------------|-------------|-------------|
| A2M         | alpha-2-macroglobulin                            | 1.621       | 3.04E-19    |
| ABCA1       | ATP binding cassette subfamily A member 1        | 1.726       | 3.22E-27    |
| ABCA4       | ATP binding cassette subfamily A member 4        | 3.462       | 0.000074    |
| ACKR3       | atypical chemokine receptor 3                    | 6.536       | 5.38E-09    |
| ACTA2       | actin alpha 2, smooth muscle                     | 1.674       | 7.62E-10    |
| ADORA2B     | adenosine A2b receptor                           | 1.569       | 4.84E-19    |
| ADRB2       | adrenoceptor beta 2                              | 2.406       | 0.0000882   |
| AGT         | angiotensinogen                                  | 1.879       | 0.00902     |
| AHNAK       | AHNAK nucleoprotein                              | 1.722       | 6.65E-19    |
| AJAP1       | adherens junctions associated protein 1          | -3.059      | 3.31E-09    |
| AJUBA       | ajuba LIM protein                                | -1.552      | 1.95E-12    |
| ALK         | ALK receptor tyrosine kinase                     | -3.854      | 2.99E-16    |
| AMOT        | angiomotin                                       | -1.603      | 1.86E-15    |
| ANGPTL4     | angiopoietin like 4                              | 7.751       | 2.5E-24     |
| APLN        | apelin                                           | -1.833      | 0.00000355  |
| ARHGAP24    | Rho GTPase activating protein 24                 | 13.636      | 1.6E-19     |
| ARHGDIA     | Rho GDP dissociation inhibitor alpha             | -1.633      | 0.000000307 |
| ARRB1       | arrestin beta 1                                  | 1.832       | 0.0000138   |
| ASIC1       | acid sensing ion channel subunit 1               | 1.862       | 3.01E-09    |
| ATOH8       | atonal bHLH transcription factor 8               | -2.78       | 0.000000518 |
| AZGP1       | alpha-2-glycoprotein 1, zinc-binding             | -6.456      | 9.34E-114   |
| BCAN        | brevican                                         | 3.501       | 8.63E-54    |
| BCAR3       | BCAR3 adaptor protein, NSP family member         | 1.588       | 1.94E-18    |
| BHLHE40     | basic helix-loop-helix family member e40         | 1.776       | 1.65E-29    |
| BHLHE41     | basic helix-loop-helix family member e41         | 2.669       | 1.57E-51    |
| BMP4        | bone morphogenetic protein 4                     | 6.467       | 0.00000848  |
| BOC         | BOC cell adhesion associated, oncogene regulated | 1.806       | 4.05E-19    |
| C3          | complement C3                                    | 7.404       | 7.74E-28    |
| C3AR1       | complement C3a receptor 1                        | 2.566       | 0.000764    |
| CA9         | carbonic anhydrase 9                             | -2.025      | 4.18E-24    |
| CARD10      | caspase recruitment domain family member 10      | -1.741      | 9.84E-08    |
| CASP1       | caspase 1                                        | 1.876       | 0.00000248  |
| CCN2        | cellular communication network factor 2          | -1.86       | 6.31E-54    |
| CD55        | CD55 molecule (Cromer blood group)               | 3.675       | 1.84E-13    |
| CD82        | CD82 molecule                                    | 2.865       | 2.64E-76    |

|         |                                                       |        |             |
|---------|-------------------------------------------------------|--------|-------------|
| CD93    | CD93 molecule                                         | 3.717  | 0.000000976 |
| CD200   | CD200 molecule                                        | -2.28  | 3.28E-11    |
| CD274   | CD274 molecule                                        | -1.688 | 3.29E-17    |
| CDKN1A  | cyclin dependent kinase inhibitor 1A                  | 1.706  | 1.94E-17    |
| CELSR2  | cadherin EGF LAG seven-pass G-type receptor 2         | -1.586 | 1.36E-13    |
| CEMIP   | cell migration inducing hyaluronidase 1               | 2.334  | 1.54E-20    |
| CGA     | glycoprotein hormones, alpha polypeptide              | -3.603 | 8.64E-08    |
| CHFR    | checkpoint with forkhead and ring finger domains      | -4.147 | 4.13E-36    |
| CHI3L1  | chitinase 3 like 1                                    | 38.204 | 7.44E-269   |
| CHRD    | chordin                                               | -2.433 | 0.00115     |
| CLCA2   | chloride channel accessory 2                          | 3.86   | 0.0000115   |
| CLCN4   | chloride voltage-gated channel 4                      | -1.667 | 1.11E-08    |
| CLDN1   | claudin 1                                             | 2.003  | 6.6E-11     |
| CLU     | clusterin                                             | 2.442  | 1.98E-35    |
| CMTM8   | CKLF like MARVEL transmembrane domain containing 8    | -1.817 | 2.23E-11    |
| CNR1    | cannabinoid receptor 1                                | -2.776 | 3.45E-65    |
| CNTNAP2 | contactin associated protein like 2                   | 6.052  | 3.32E-31    |
| COL11A1 | collagen type XI alpha 1 chain                        | -1.807 | 5.44E-32    |
| COL17A1 | collagen type XVII alpha 1 chain                      | 3.841  | 3.96E-94    |
| CORO1A  | coronin 1A                                            | -1.667 | 0.000215    |
| CORO1B  | coronin 1B                                            | -1.567 | 0.00000026  |
| CPEB1   | cytoplasmic polyadenylation element binding protein 1 | 2.063  | 1.19E-08    |
| CRYAB   | crystallin alpha B                                    | -5.072 | 3.67E-121   |
| CSF1    | colony stimulating factor 1                           | 1.716  | 1.92E-22    |
| CSF2    | colony stimulating factor 2                           | 2.847  | 0.000000504 |
| CTNNA2  | catenin alpha 2                                       | -3.667 | 2.02E-42    |
| CTNND2  | catenin delta 2                                       | -1.703 | 1.61E-10    |
| CTSH    | cathepsin H                                           | 1.854  | 3.22E-24    |
| CTSS    | cathepsin S                                           | 3.604  | 5.28E-34    |
| CTSV    | cathepsin V                                           | 1.922  | 1.15E-11    |
| CTSZ    | cathepsin Z                                           | -1.888 | 1.34E-17    |
| CXADR   | CXADR Ig-like cell adhesion molecule                  | 2.294  | 1.04E-29    |
| CXCL12  | C-X-C motif chemokine ligand 12                       | 5.381  | 1.91E-28    |
| DAB1    | DAB adaptor protein 1                                 | -4.372 | 5.76E-09    |
| DCLK1   | doublecortin like kinase 1                            | 1.64   | 4.03E-11    |
| DIO2    | iodothyronine deiodinase 2                            | -4.564 | 6.28E-67    |
| DIRAS3  | DIRAS family GTPase 3                                 | -1.552 | 4.68E-12    |

|          |                                                  |        |             |
|----------|--------------------------------------------------|--------|-------------|
| DLC1     | DLC1 Rho GTPase activating protein               | 2.1    | 1.49E-21    |
| DLL1     | delta like canonical Notch ligand 1              | 2.146  | 0.0000406   |
| DNM1     | dynamin 1                                        | 1.656  | 1.05E-20    |
| DOCK3    | dedicator of cytokinesis 3                       | 2.056  | 3.13E-13    |
| DOCK4    | dedicator of cytokinesis 4                       | 1.542  | 4.09E-11    |
| DPYSL5   | dihydropyrimidinase like 5                       | 6.085  | 6.83E-100   |
| DRD2     | dopamine receptor D2                             | 1.654  | 1.15E-19    |
| DSE      | dermatan sulfate epimerase                       | 2.116  | 7.93E-23    |
| DSG2     | desmoglein 2                                     | 1.607  | 1.13E-21    |
| DUSP10   | dual specificity phosphatase 10                  | 1.874  | 9.27E-18    |
| EDIL3    | EGF like repeats and discoidin domains 3         | 2.756  | 3.5E-50     |
| EDN1     | endothelin 1                                     | -2.74  | 4.29E-57    |
| EDNRB    | endothelin receptor type B                       | -1.729 | 1.44E-11    |
| EFNA1    | ephrin A1                                        | 2.559  | 2.33E-10    |
| EN1      | engrailed homeobox 1                             | -1.639 | 0.000000336 |
| ENG      | endoglin                                         | -2.715 | 6.67E-15    |
| EPAS1    | endothelial PAS domain protein 1                 | 2.101  | 1.89E-46    |
| EPB41L4B | erythrocyte membrane protein band 4.1 like 4B    | 1.948  | 3.54E-13    |
| EPHA3    | EPH receptor A3                                  | -1.676 | 1.3E-25     |
| EPHA4    | EPH receptor A4                                  | -1.628 | 0.00000532  |
| EPHA5    | EPH receptor A5                                  | 2.213  | 3.34E-17    |
| EPHB2    | EPH receptor B2                                  | 2.581  | 1.21E-75    |
| ERAP1    | endoplasmic reticulum aminopeptidase 1           | 1.734  | 4.9E-26     |
| F3       | coagulation factor III, tissue factor            | -2.008 | 1.17E-33    |
| F11R     | F11 receptor                                     | -1.762 | 2.76E-09    |
| FABP7    | fatty acid binding protein 7                     | -1.819 | 6.11E-27    |
| FAM43A   | family with sequence similarity 43 member A      | -1.861 | 0.00000184  |
| FAP      | fibroblast activation protein alpha              | 3.686  | 2.29E-34    |
| FAS      | Fas cell surface death receptor                  | 1.641  | 4.42E-13    |
| FAT3     | FAT atypical cadherin 3                          | -1.612 | 3.57E-12    |
| FBLN1    | fibulin 1                                        | 1.563  | 4.08E-11    |
| FBLN5    | fibulin 5                                        | 6.677  | 0.0000003   |
| FBXO4    | F-box protein 4                                  | -1.716 | 6.11E-10    |
| FER      | FER tyrosine kinase                              | -1.626 | 2.99E-11    |
| FEZF1    | FEZ family zinc finger 1                         | -3.652 | 0.00000713  |
| FLRT2    | fibronectin leucine rich transmembrane protein 2 | 2.135  | 2.88E-30    |
| FLRT3    | fibronectin leucine rich transmembrane protein 3 | -2.322 | 9.72E-31    |

|                     |                                              |        |            |
|---------------------|----------------------------------------------|--------|------------|
| FOXA1               | forkhead box A1                              | -1.89  | 5.44E-12   |
| FOXF1               | forkhead box F1                              | 5.763  | 6.41E-16   |
| FOXF2               | forkhead box F2                              | 1.672  | 0.0000345  |
| FOXG1               | forkhead box G1                              | -1.793 | 1.31E-11   |
| FOXO4               | forkhead box O4                              | 1.869  | 0.0000164  |
| FOXQ1               | forkhead box Q1                              | 2.579  | 2.64E-08   |
| FPR1                | formyl peptide receptor 1                    | 7.918  | 7.42E-39   |
| FST                 | follistatin                                  | -1.824 | 1.69E-12   |
| GAP43               | growth associated protein 43                 | -2.231 | 3.66E-23   |
| GAS1                | growth arrest specific 1                     | 1.877  | 0.00000291 |
| GATA2               | GATA binding protein 2                       | -1.654 | 0.00000449 |
| GATA3               | GATA binding protein 3                       | -2.292 | 5.88E-29   |
| GCNT1               | glucosaminyl (N-acetyl) transferase 1        | 1.831  | 2.5E-28    |
| GJA1                | gap junction protein alpha 1                 | 1.901  | 3.22E-48   |
| GJB2                | gap junction protein beta 2                  | 2.304  | 5.34E-61   |
| GNAL                | G protein subunit alpha L                    | 4.213  | 7.05E-16   |
| GNAO1               | G protein subunit alpha o1                   | 1.872  | 4.29E-09   |
| GPM6A               | glycoprotein M6A                             | -4.538 | 6.82E-135  |
| GSN                 | gelsolin                                     | -1.772 | 3.57E-17   |
| HAS3                | hyaluronan synthase 3                        | 2.883  | 9.38E-62   |
| HBP1                | HMG-box transcription factor 1               | 1.594  | 2.02E-11   |
| HMOX1               | heme oxygenase 1                             | 1.782  | 4E-27      |
| HOXA7               | homeobox A7                                  | -4.225 | 3.84E-08   |
| HSPA5               | heat shock protein family A (Hsp70) member 5 | 1.589  | 1.45E-26   |
| ICAM1               | intercellular adhesion molecule 1            | -2.088 | 0.000942   |
| ICOSLG/LOC102723996 | inducible T cell costimulator ligand         | 1.809  | 9.83E-15   |
| IDO1                | indoleamine 2,3-dioxygenase 1                | 6.136  | 9.45E-19   |
| IGFBP2              | insulin like growth factor binding protein 2 | -1.778 | 2.63E-16   |
| IGFBP3              | insulin like growth factor binding protein 3 | 2.047  | 1.53E-36   |
| IGFBP4              | insulin like growth factor binding protein 4 | 7.783  | 8.13E-307  |
| IGFBP5              | insulin like growth factor binding protein 5 | -4.757 | 6.68E-183  |
| IGFBP6              | insulin like growth factor binding protein 6 | 1.592  | 0.00000276 |
| IL7                 | interleukin 7                                | 2.089  | 0.0000152  |
| IL11                | interleukin 11                               | 2.625  | 5.17E-36   |
| IL24                | interleukin 24                               | 9.158  | 0.00000516 |
| IL13RA2             | interleukin 13 receptor subunit alpha 2      | 2.404  | 1.93E-46   |
| IL15RA              | interleukin 15 receptor subunit alpha        | 2.315  | 5.92E-08   |

|          |                                                             |        |             |
|----------|-------------------------------------------------------------|--------|-------------|
| IL27RA   | interleukin 27 receptor subunit alpha                       | 2.194  | 1.98E-20    |
| IL4R     | interleukin 4 receptor                                      | 5.011  | 3.94E-46    |
| INHBA    | inhibin subunit beta A                                      | -1.859 | 1.29E-18    |
| ITGA1    | integrin subunit alpha 1                                    | 2.135  | 9.01E-21    |
| ITGA2    | integrin subunit alpha 2                                    | 2.682  | 4.09E-73    |
| ITGB3    | integrin subunit beta 3                                     | 2.002  | 1.63E-29    |
| ITGBL1   | integrin subunit beta like 1                                | -1.701 | 2.03E-10    |
| JAG2     | jagged canonical Notch ligand 2                             | 3.125  | 0.000000149 |
| JUP      | junction plakoglobin                                        | -2.752 | 8.76E-12    |
| KALRN    | kalirin RhoGEF kinase                                       | 2.136  | 1.71E-20    |
| KCNK2    | potassium two pore domain channel subfamily K member 2      | 1.803  | 0.000161    |
| KCNK5    | potassium two pore domain channel subfamily K member 5      | 16.382 | 0.000000252 |
| KCNMA1   | potassium calcium-activated channel subfamily M alpha 1     | 3.006  | 4.22E-136   |
| KCNN4    | potassium calcium-activated channel subfamily N member 4    | 1.856  | 1.21E-22    |
| KDM5B    | lysine demethylase 5B                                       | 1.683  | 2.64E-22    |
| KIAA0319 | KIAA0319                                                    | 2.06   | 1.41E-09    |
| KIRREL3  | kirre like nephrin family adhesion molecule 3               | -1.734 | 7.06E-10    |
| KITLG    | KIT ligand                                                  | 2.576  | 1.83E-43    |
| KLF17    | Kruppel like factor 17                                      | 2.727  | 0.000237    |
| L1CAM    | L1 cell adhesion molecule                                   | 2.628  | 2.77E-35    |
| LAMC2    | laminin subunit gamma 2                                     | 2.224  | 2.15E-10    |
| LCP1     | lymphocyte cytosolic protein 1                              | 1.668  | 6.12E-13    |
| LDHA     | lactate dehydrogenase A                                     | 1.58   | 2.08E-10    |
| LGR4     | leucine rich repeat containing G protein-coupled receptor 4 | 3.498  | 2.53E-55    |
| LIPE     | lipase E, hormone sensitive type                            | -2.689 | 1.81E-10    |
| LMCD1    | LIM and cysteine rich domains 1                             | -1.97  | 2.54E-18    |
| LOX      | lysyl oxidase                                               | 3.94   | 8.54E-53    |
| LRP1     | LDL receptor related protein 1                              | 1.68   | 3.67E-15    |
| MARCKSL1 | MARCKS like 1                                               | -1.529 | 3.76E-10    |
| MATN2    | matrilin 2                                                  | 3.829  | 1.51E-147   |
| MDGA1    | MAM domain containing glycosylphosphatidylinositol anchor 1 | 2.117  | 5.05E-32    |
| MDK      | midkine                                                     | -4.893 | 1.48E-33    |
| MEF2C    | myocyte enhancer factor 2C                                  | -1.725 | 6.84E-10    |
| MELTF    | melanotransferrin                                           | -2.317 | 3.67E-12    |
| MGLL     | monoglyceride lipase                                        | 1.841  | 7.94E-35    |
| MGP      | matrix Gla protein                                          | 2.134  | 1.13E-36    |
| MME      | membrane metalloendopeptidase                               | 2.313  | 6.62E-23    |

|          |                                                                   |         |             |
|----------|-------------------------------------------------------------------|---------|-------------|
| MMP3     | matrix metalloproteinase 3                                        | 5.395   | 4E-16       |
| MMP7     | matrix metalloproteinase 7                                        | 5.167   | 5.19E-106   |
| MMP9     | matrix metalloproteinase 9                                        | 5.757   | 0.00000972  |
| MMP14    | matrix metalloproteinase 14                                       | 2.709   | 3.19E-91    |
| MTSS1    | MTSS I-BAR domain containing 1                                    | 8.902   | 4.35E-44    |
| MYRF     | myelin regulatory factor                                          | 1.608   | 3.76E-12    |
| NEDD9    | neural precursor cell expressed, developmentally down-regulated 9 | -1.666  | 1.3E-20     |
| NEO1     | neogenin 1                                                        | 2.024   | 4.28E-29    |
| NES      | nestin                                                            | -2.734  | 8.27E-102   |
| NEUROG2  | neurogenin 2                                                      | -3.742  | 0.0000456   |
| NFASC    | neurofascin                                                       | 2.278   | 1.4E-44     |
| NFIA     | nuclear factor I A                                                | -2.018  | 0.000511    |
| NISCH    | nischarin                                                         | -1.654  | 1.25E-15    |
| NOTCH1   | notch receptor 1                                                  | -2.329  | 7.18E-09    |
| NR1H4    | nuclear receptor subfamily 1 group H member 4                     | -9.412  | 1.25E-32    |
| NRXN3    | neurexin 3                                                        | -4.214  | 4.87E-20    |
| NTN1     | netrin 1                                                          | 3.566   | 3.76E-34    |
| NTN4     | netrin 4                                                          | 2.923   | 5.76E-59    |
| NTRK3    | neurotrophic receptor tyrosine kinase 3                           | -2.437  | 1.3E-25     |
| NUDT16L1 | nudix hydrolase 16 like 1                                         | -1.821  | 0.000000155 |
| OCLN     | occludin                                                          | 1.854   | 0.000103    |
| ONECUT1  | one cut homeobox 1                                                | -3.15   | 0.00545     |
| OPRD1    | opioid receptor delta 1                                           | -10.386 | 0.000000555 |
| OTULINL  | OTU deubiquitinase with linear linkage specificity like           | 1.9     | 0.00000042  |
| P4HA2    | prolyl 4-hydroxylase subunit alpha 2                              | 1.604   | 1.44E-17    |
| PAPPA    | pappalysin 1                                                      | 2.136   | 2.98E-29    |
| PARVB    | parvin beta                                                       | -2.785  | 0.000544    |
| PCDH10   | protocadherin 10                                                  | -4.398  | 1.31E-101   |
| PCSK4    | proprotein convertase subtilisin/kexin type 4                     | -2.162  | 0.00117     |
| PDCD1LG2 | programmed cell death 1 ligand 2                                  | 1.583   | 0.00000197  |
| PDE2A    | phosphodiesterase 2A                                              | 3.198   | 0.000000547 |
| PDGFD    | platelet derived growth factor D                                  | 1.646   | 2.45E-13    |
| PGF      | placental growth factor                                           | -2.295  | 1.9E-16     |
| PHLDA2   | pleckstrin homology like domain family A member 2                 | -2.639  | 1.35E-08    |
| PICK1    | protein interacting with PRKCA 1                                  | -2.398  | 1.41E-26    |
| PKN1     | protein kinase N1                                                 | -1.569  | 3.95E-11    |
| PKP2     | plakophilin 2                                                     | -1.568  | 3.72E-11    |

|         |                                                                          |         |             |
|---------|--------------------------------------------------------------------------|---------|-------------|
| PLAT    | plasminogen activator, tissue type                                       | -2.616  | 2.05E-66    |
| PLAUR   | plasminogen activator, urokinase receptor                                | 1.671   | 4.6E-21     |
| PLP1    | proteolipid protein 1                                                    | -4.355  | 0.000000646 |
| PLS1    | plastin 1                                                                | 1.601   | 5.06E-13    |
| PLXNA4  | plexin A4                                                                | 2.804   | 8.09E-10    |
| PLXND1  | plexin D1                                                                | -1.554  | 1.69E-12    |
| PODXL2  | podocalyxin like 2                                                       | 1.895   | 1.08E-11    |
| PODXL   | podocalyxin like                                                         | 2.088   | 1.12E-62    |
| POSTN   | periostin                                                                | -34.329 | 3.17E-37    |
| PREX1   | phosphatidylinositol-3,4,5-trisphosphate dependent Rac exchange factor 1 | 2.032   | 8.23E-29    |
| PRKAR1B | protein kinase cAMP-dependent type I regulatory subunit beta             | -1.839  | 1.73E-09    |
| PRKCZ   | protein kinase C zeta                                                    | 1.735   | 0.000000031 |
| PRKG1   | protein kinase cGMP-dependent 1                                          | 6.435   | 1.15E-11    |
| PRLR    | prolactin receptor                                                       | -1.975  | 1.1E-09     |
| PROX1   | prospero homeobox 1                                                      | -1.775  | 6.83E-08    |
| PTPRU   | protein tyrosine phosphatase receptor type U                             | 3.08    | 1.54E-31    |
| PTPRZ1  | protein tyrosine phosphatase receptor type Z1                            | -1.542  | 0.00000163  |
| PTX3    | pentraxin 3                                                              | 1.827   | 2.69E-21    |
| RAMP1   | receptor activity modifying protein 1                                    | -2.432  | 0.000563    |
| RASGRF1 | Ras protein specific guanine nucleotide releasing factor 1               | -2.563  | 0.0000678   |
| RIN1    | Ras and Rab interactor 1                                                 | -1.681  | 0.000105    |
| RIPOR2  | RHO family interacting cell polarization regulator 2                     | -4.163  | 3.59E-106   |
| ROR1    | receptor tyrosine kinase like orphan receptor 1                          | 2.159   | 5.55E-17    |
| RORA    | RAR related orphan receptor A                                            | 2.981   | 0.00102     |
| S100A2  | S100 calcium binding protein A2                                          | 3.306   | 4.58E-54    |
| S100A4  | S100 calcium binding protein A4                                          | 2.146   | 4.67E-11    |
| S100B   | S100 calcium binding protein B                                           | -3.455  | 8.68E-72    |
| SAA1    | serum amyloid A1                                                         | 6.632   | 0.00000548  |
| SATB1   | SATB homeobox 1                                                          | 1.761   | 0.00000083  |
| SCNN1A  | sodium channel epithelial 1 alpha subunit                                | 3.974   | 1.61E-18    |
| SCPEP1  | serine carboxypeptidase 1                                                | 1.732   | 2.36E-29    |
| SCUBE3  | signal peptide, CUB domain and EGF like domain containing 3              | 1.573   | 6.28E-12    |
| SELL    | selectin L                                                               | 3.646   | 3.72E-10    |
| SEMA3B  | semaphorin 3B                                                            | -5.78   | 8.11E-48    |
| SEMA3C  | semaphorin 3C                                                            | 1.877   | 2.54E-37    |
| SEMA3F  | semaphorin 3F                                                            | 6.566   | 1.18E-21    |
| SEMA5A  | semaphorin 5A                                                            | -1.636  | 0.0000665   |

|          |                                                              |        |             |
|----------|--------------------------------------------------------------|--------|-------------|
| SERPINA1 | serpin family A member 1                                     | 2.51   | 1.39E-15    |
| SERPINA5 | serpin family A member 5                                     | 2.157  | 0.0000649   |
| SERPINE1 | serpin family E member 1                                     | 2.024  | 5.43E-41    |
| SERPINE2 | serpin family E member 2                                     | 1.746  | 2.22E-30    |
| SERPINH1 | serpin family H member 1                                     | -3.539 | 8.57E-63    |
| SFRP1    | secreted frizzled related protein 1                          | 1.742  | 6.69E-16    |
| SGK1     | serum/glucocorticoid regulated kinase 1                      | -1.522 | 1.37E-12    |
| SH3PXD2A | SH3 and PX domains 2A                                        | 1.953  | 3.46E-36    |
| SLC1A3   | solute carrier family 1 member 3                             | 1.898  | 4.43E-34    |
| SLC2A8   | solute carrier family 2 member 8                             | -1.562 | 0.000000461 |
| SLC8A1   | solute carrier family 8 member A1                            | 3.513  | 5.44E-67    |
| SLPI     | secretory leukocyte peptidase inhibitor                      | 22.511 | 9.14E-25    |
| SOCS2    | suppressor of cytokine signaling 2                           | -1.678 | 9.35E-17    |
| SORBS3   | sorbin and SH3 domain containing 3                           | -1.679 | 8.28E-20    |
| SOX2     | SRY-box transcription factor 2                               | -1.525 | 7.59E-11    |
| SPINT1   | serine peptidase inhibitor, Kunitz type 1                    | -2.504 | 0.00000219  |
| SPP1     | secreted phosphoprotein 1                                    | -2.433 | 1.05E-69    |
| SPSB1    | splA/ryanodine receptor domain and SOCS box containing 1     | 2.68   | 3.87E-33    |
| SRSF1    | serine and arginine rich splicing factor 1                   | 1.68   | 0.00000632  |
| ST8SIA1  | ST8 alpha-N-acetyl-neuraminide alpha-2,8-sialyltransferase 1 | 3.017  | 0.0000345   |
| STAT5A   | signal transducer and activator of transcription 5A          | -2.034 | 0.00000742  |
| STC1     | stanniocalcin 1                                              | 1.818  | 1.41E-31    |
| STMN3    | stathmin 3                                                   | 1.949  | 2.63E-11    |
| SULF1    | sulfatase 1                                                  | -4.301 | 1.86E-71    |
| TACR1    | tachykinin receptor 1                                        | 2.171  | 5.41E-20    |
| TAGLN    | transgelin                                                   | -2.988 | 4.33E-18    |
| TBX2     | T-box transcription factor 2                                 | -1.638 | 0.0000118   |
| TEAD4    | TEA domain transcription factor 4                            | -1.594 | 0.00000185  |
| TENM2    | teneurin transmembrane protein 2                             | 1.623  | 1.28E-24    |
| TFAP2C   | transcription factor AP-2 gamma                              | -1.613 | 9.24E-25    |
| TGFB2    | transforming growth factor beta 2                            | 1.628  | 1.51E-13    |
| TGFB3    | transforming growth factor beta 3                            | 2.337  | 5.3E-23     |
| TGFB1    | transforming growth factor beta induced                      | 1.536  | 4.69E-18    |
| TGM2     | transglutaminase 2                                           | -1.903 | 2.09E-27    |
| TIAM1    | T cell lymphoma invasion and metastasis 1                    | 1.762  | 4.6E-16     |
| TIMP4    | TIMP metallopeptidase inhibitor 4                            | 2.156  | 6.17E-13    |
| TLR3     | toll like receptor 3                                         | 2.517  | 0.000153    |



|          |                                      |        |           |
|----------|--------------------------------------|--------|-----------|
| TMEM201  | transmembrane protein 201            | -1.73  | 2.33E-08  |
| TNC      | tenascin C                           | 1.842  | 8.79E-33  |
| TNFAIP6  | TNF alpha induced protein 6          | 2.475  | 0.00101   |
| TNFRSF21 | TNF receptor superfamily member 21   | 2.926  | 3.63E-80  |
| TNFSF4   | TNF superfamily member 4             | -9.034 | 1.31E-115 |
| TNFSF10  | TNF superfamily member 10            | 3.003  | 1.67E-34  |
| TUBB2B   | tubulin beta 2B class IIb            | -2.648 | 5.58E-27  |
| TXK      | TXK tyrosine kinase                  | -2.777 | 4.86E-10  |
| UBE2L6   | ubiquitin conjugating enzyme E2 L6   | 1.645  | 2.21E-09  |
| UNC5B    | unc-5 netrin receptor B              | 2.051  | 0.000389  |
| VDR      | vitamin D receptor                   | 1.862  | 1.33E-12  |
| VEGFA    | vascular endothelial growth factor A | 1.849  | 2.71E-38  |
| VSNL1    | visinin like 1                       | -1.622 | 2.33E-08  |
| WNT5B    | Wnt family member 5B                 | 1.808  | 1.01E-15  |
| WT1      | WT1 transcription factor             | -1.812 | 0.00003   |
| WWC1     | WW and C2 domain containing 1        | 1.735  | 2.5E-15   |
| XDH      | xanthine dehydrogenase               | 3.199  | 9.22E-39  |
